# Supplementary material
Source: ML conference proceedings conference paper supplement (https://openreview.net/forum?id=Qdu92a5DiM)
Supplement: supplementary_material [file top_smiles_cuda:0.pdf › ICLR/plots/tdc/albuterol_similarity/top_smiles_cuda:0.pdf]

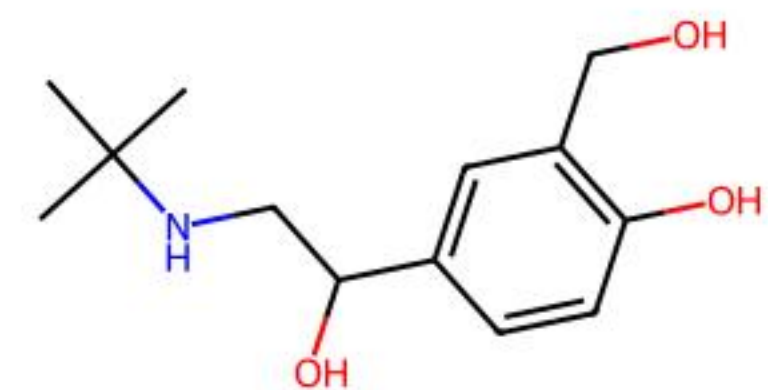

Target  
CC(C)(C)NCC(C1=CC(=C(C=C1)O)CO)O

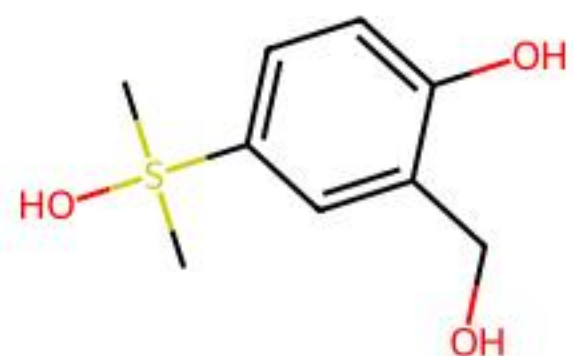

Reward: 0.86  
CS(C)(O)c1ccc(O)c(CO)c1

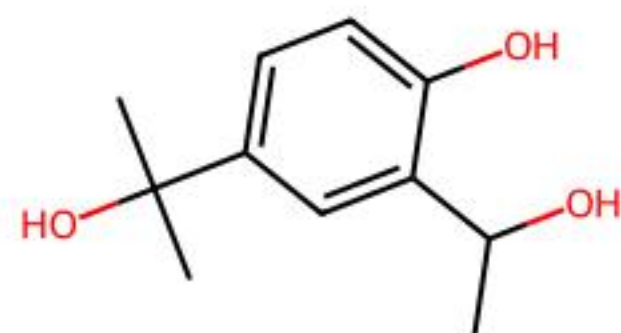

Reward: 0.83  
CC(O)c1cc(C(C)(C)O)ccc1O

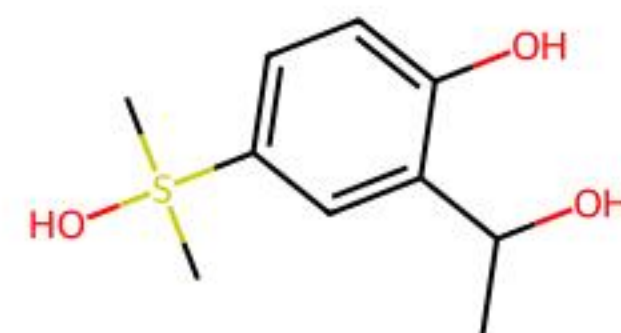

Reward: 0.83  
CC(O)c1cc(S(C)(C)O)ccc1O

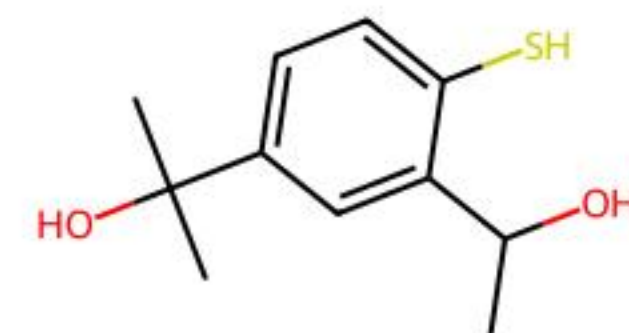

Reward: 0.83  
CC(O)c1cc(C(C)(C)O)ccc1S

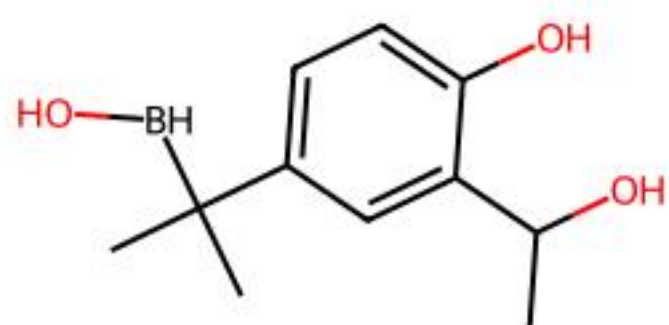

Reward: 0.82  
CC(O)c1cc(C(C)(C)BO)ccc1O

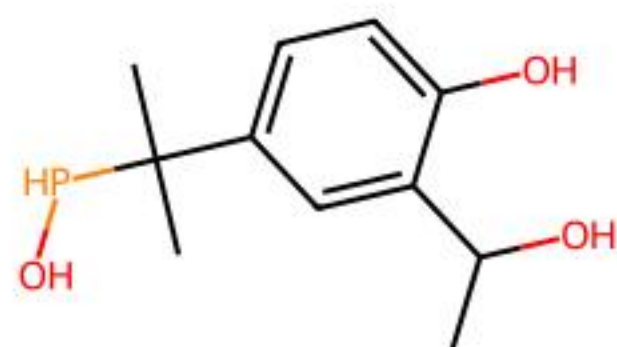

Reward: 0.82  
CC(O)c1cc(C(C)(C)PO)ccc1O

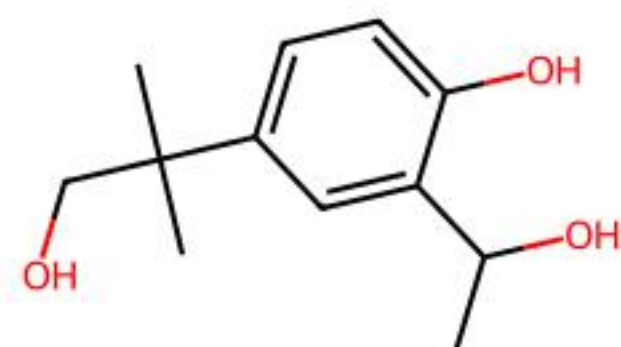

Reward: 0.82  
CC(O)c1cc(C(C)(C)CO)ccc1O

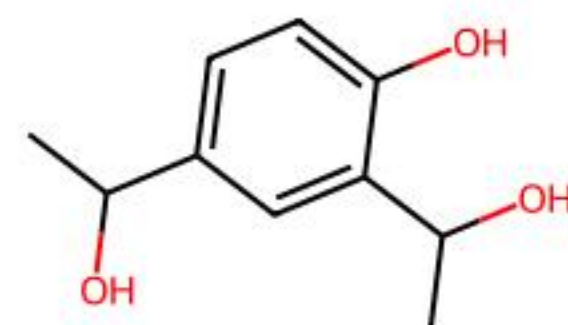

Reward: 0.82  
CC(O)c1ccc(O)c(C(C)O)c1

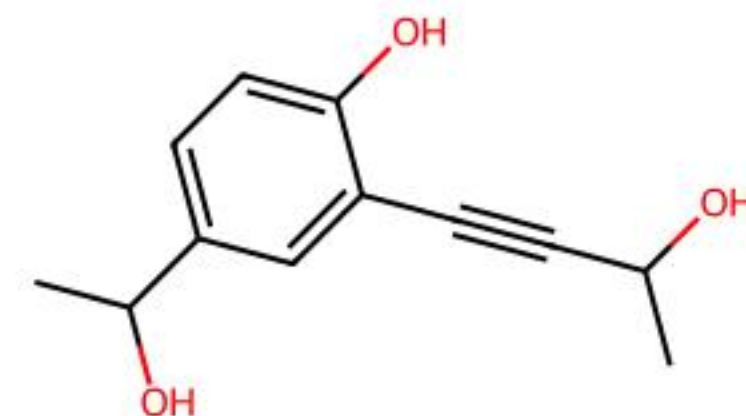

Reward: 0.81  
CC(O)C#Cc1cc(C(C)O)ccc1O

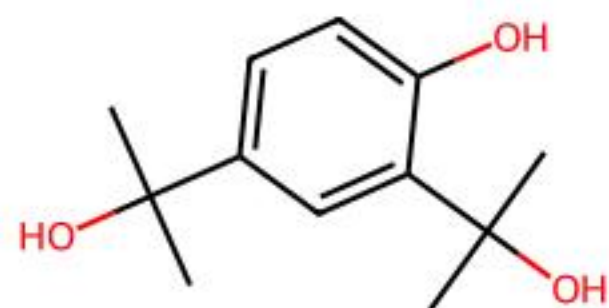

Reward: 0.79  
CC(C)(O)c1ccc(O)c(C(C)(C)O)c1
