# Supplementary material
Source: ML conference proceedings conference paper supplement (https://openreview.net/forum?id=Qdu92a5DiM)
Supplement: supplementary_material [file top_smiles_cuda:0.pdf › ICLR/plots/tdc/amlodipine_mpo/top_smiles_cuda:0.pdf]

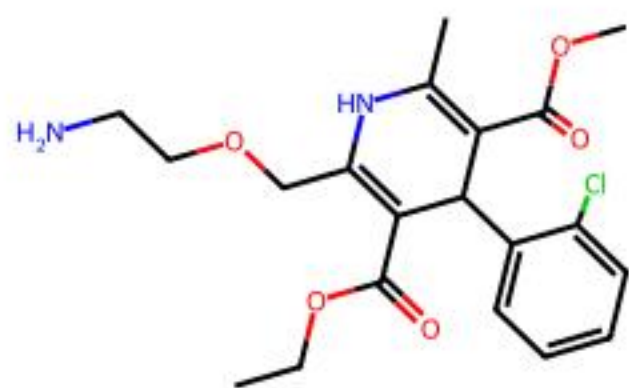

Target  
CCOC(=O)C1=C(NC(=C(C1C2=CC=CC=C2Cl)C(=O)OC)C)COCCN

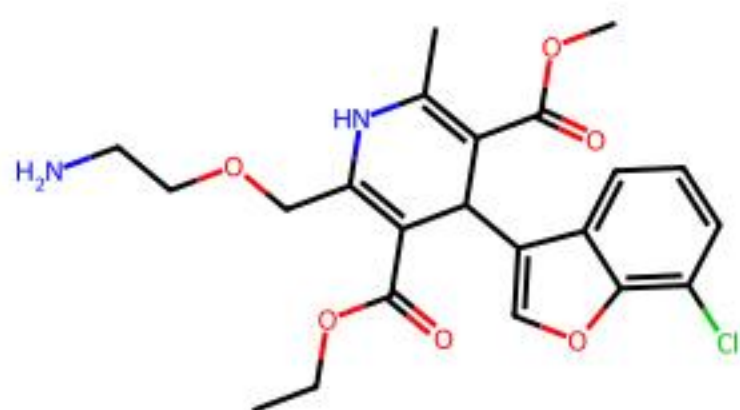

Reward: 0.88  
CCOC(=O)C1=C(COCCN)NC(C)=C(C(=O)OC)C1c1coc2c(Cl)cccc12

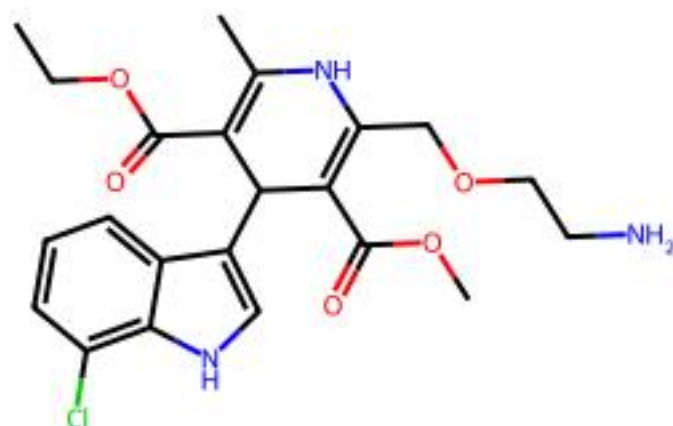

Reward: 0.88  
CCOC(=O)C1=C(C)NC(COCCN)=C(C(=O)OC)C1c1c[nH]c2c(Cl)cccc12

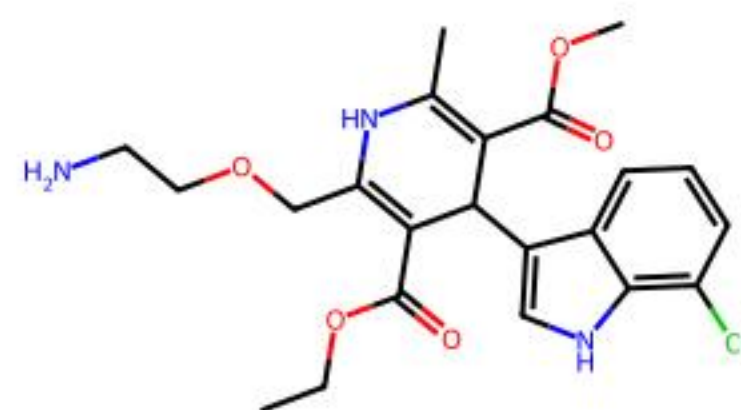

Reward: 0.88  
CCOC(=O)C1=C(COCCN)NC(C)=C(C(=O)OC)C1c1c[nH]c2c(Cl)cccc12

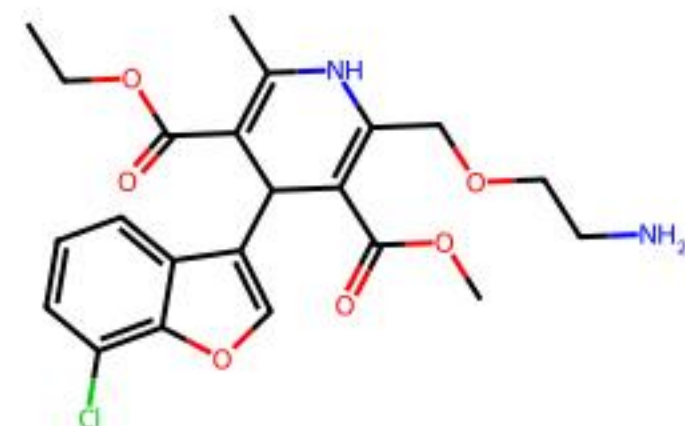

Reward: 0.88  
CCOC(=O)C1=C(C)NC(COCCN)=C(C(=O)OC)C1c1coc2c(Cl)cccc12

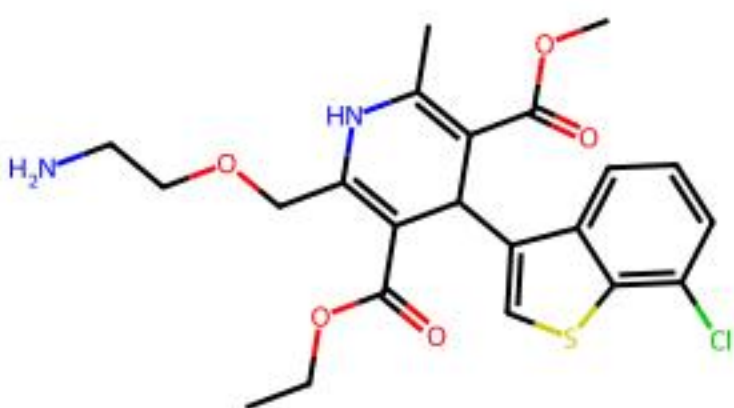

Reward: 0.88  
CCOC(=O)C1=C(COCCN)NC(C)=C(C(=O)OC)C1c1csc2c(Cl)cccc12

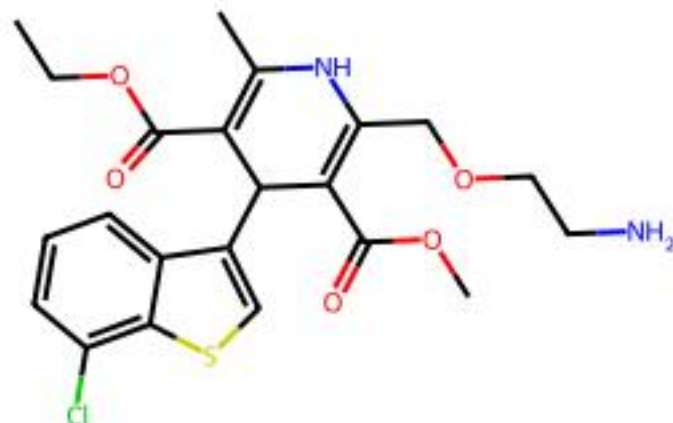

Reward: 0.88  
CCOC(=O)C1=C(C)NC(COCCN)=C(C(=O)OC)C1c1csc2c(Cl)cccc12

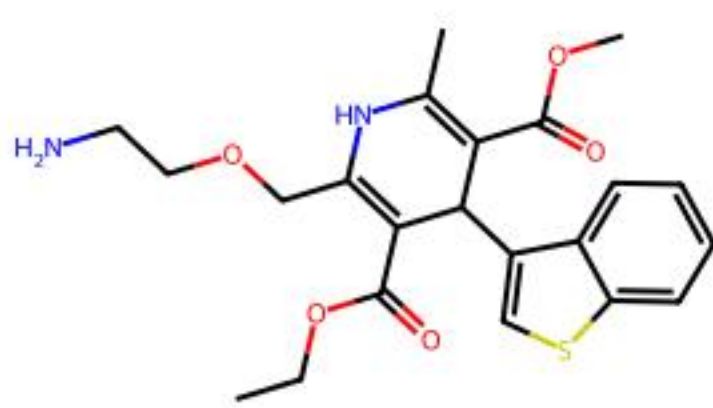

Reward: 0.88  
CCOC(=O)C1=C(COCCN)NC(C)=C(C(=O)OC)C1c1csc2ccccc12

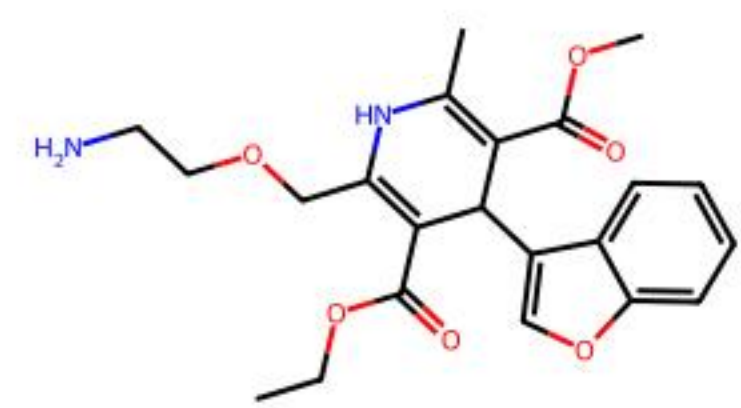

Reward: 0.88  
CCOC(=O)C1=C(COCCN)NC(C)=C(C(=O)OC)C1c1coc2ccccc12

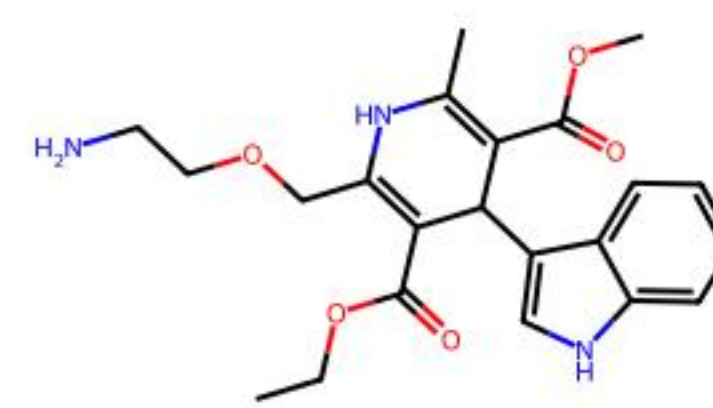

Reward: 0.88  
CCOC(=O)C1=C(COCCN)NC(C)=C(C(=O)OC)C1c1c[nH]c2ccccc12

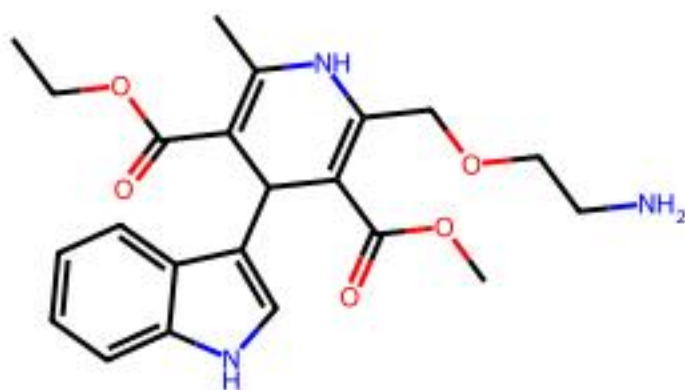

Reward: 0.88  
CCOC(=O)C1=C(C)NC(COCCN)=C(C(=O)OC)C1c1c[nH]c2ccccc12
