# Supplementary material
Source: ML conference proceedings conference paper supplement (https://openreview.net/forum?id=Qdu92a5DiM)
Supplement: supplementary_material [file top_smiles_cuda:0.pdf › ICLR/plots/tdc/celecoxib_rediscovery/top_smiles_cuda:0.pdf]

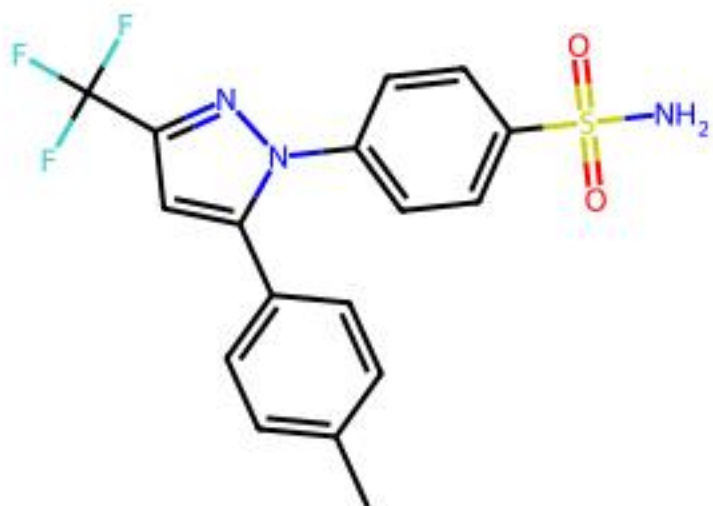

Target  
CC1=CC=C(C(C=C1)C2=CC(=NN2)C3=CC=C(C(C=C3)S(=O)(=O)N)C(F)(F)F)C(F)(F)F

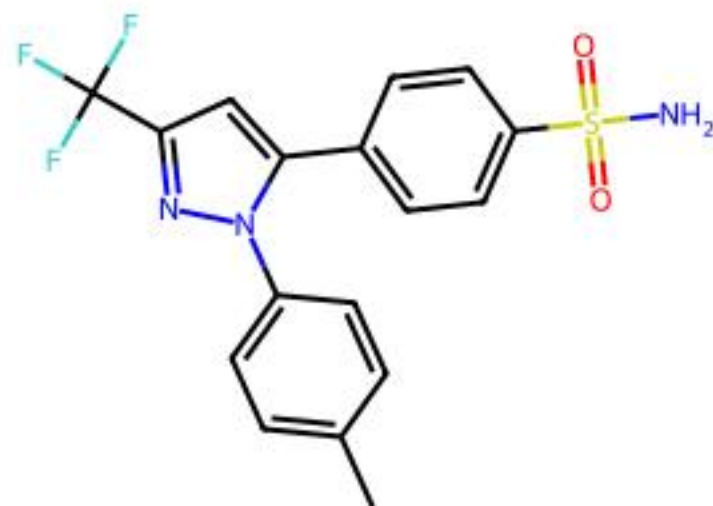

Reward: 1.00  
Cc1ccc(-n2nc(C(F)(F)F)cc2-c2ccc(S(N)(=O)=O)cc2)cc1

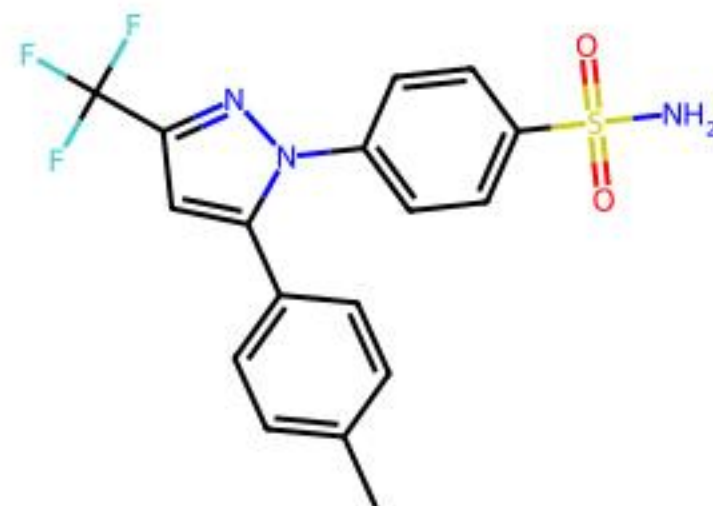

Reward: 1.00  
Cc1ccc(-c2cc(C(F)(F)F)nn2-c2ccc(S(N)(=O)=O)cc2)cc1

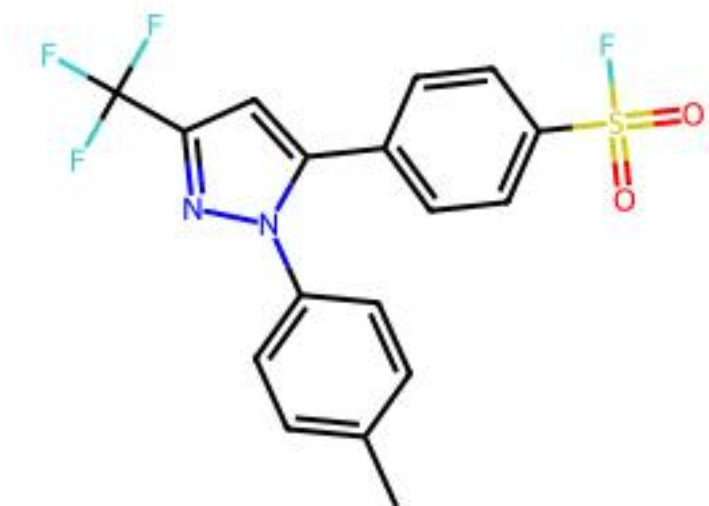

Reward: 0.87  
Cc1ccc(-n2nc(C(F)(F)F)cc2-c2ccc(S(=O)(=O)F)cc2)cc1

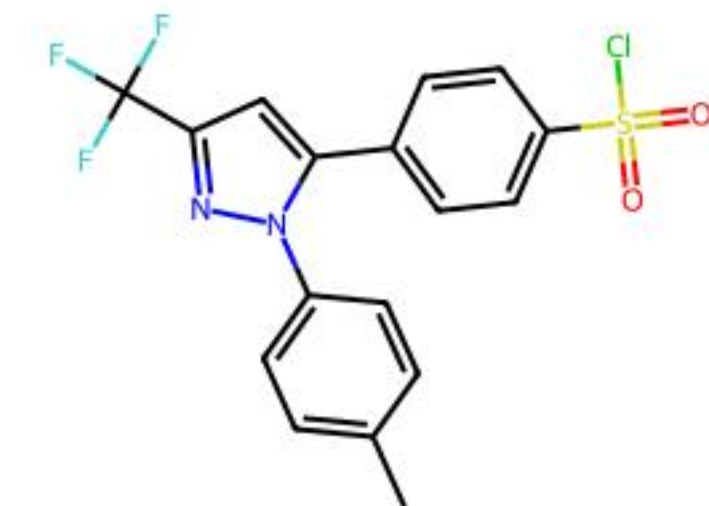

Reward: 0.87  
Cc1ccc(-n2nc(C(F)(F)F)cc2-c2ccc(S(=O)(=O)Cl)cc2)cc1

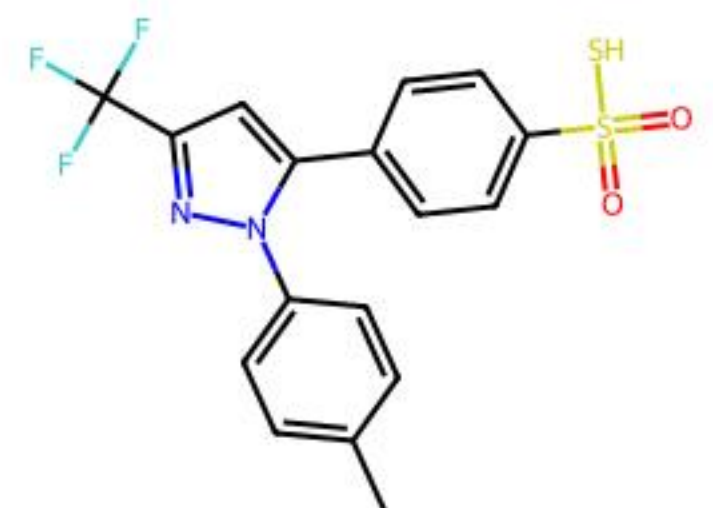

Reward: 0.87  
Cc1ccc(-n2nc(C(F)(F)F)cc2-c2ccc(S(=O)(=O)S)cc2)cc1

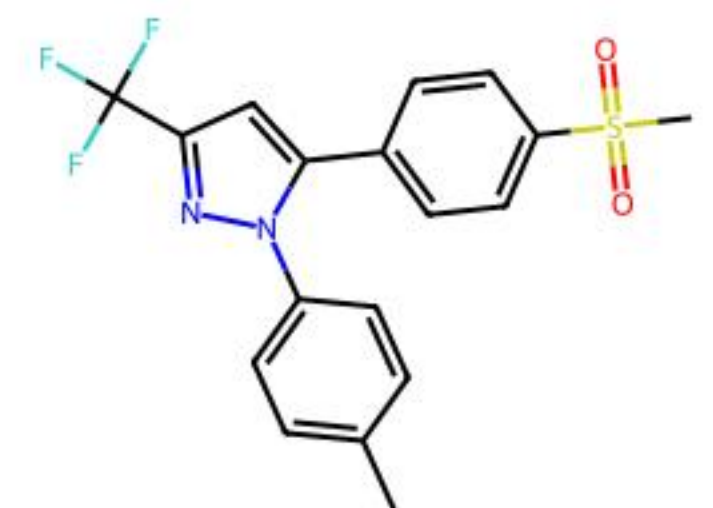

Reward: 0.87  
Cc1ccc(-n2nc(C(F)(F)F)cc2-c2ccc(S(C)(=O)=O)cc2)cc1

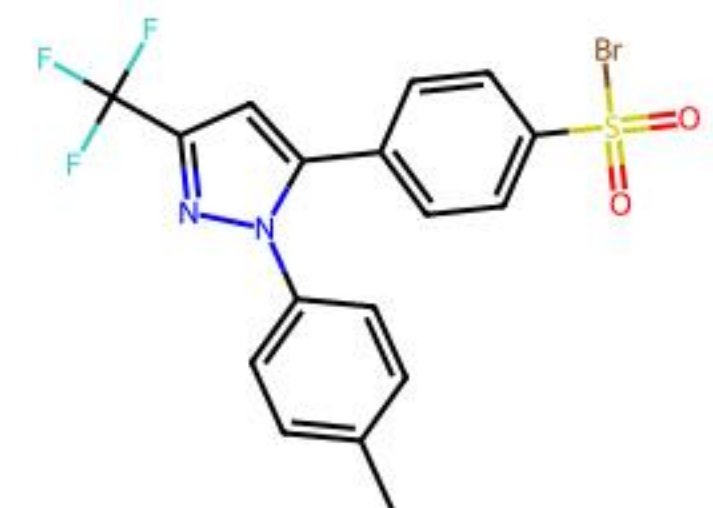

Reward: 0.87  
Cc1ccc(-n2nc(C(F)(F)F)cc2-c2ccc(S(=O)(=O)Br)cc2)cc1

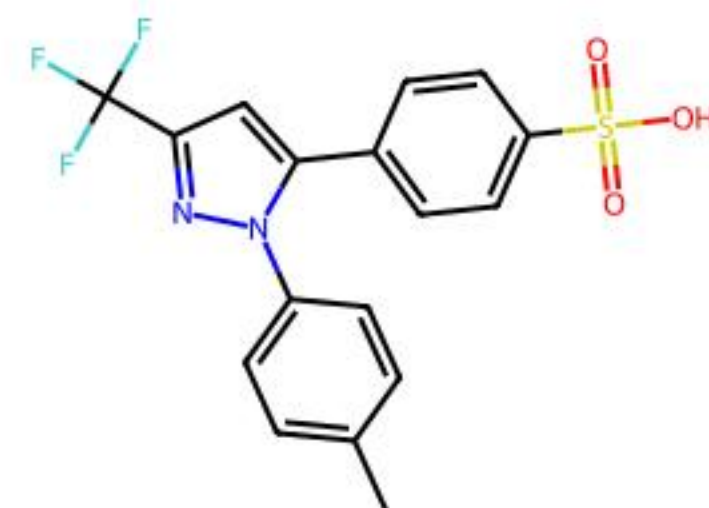

Reward: 0.87  
Cc1ccc(-n2nc(C(F)(F)F)cc2-c2ccc(S(=O)(=O)O)cc2)cc1

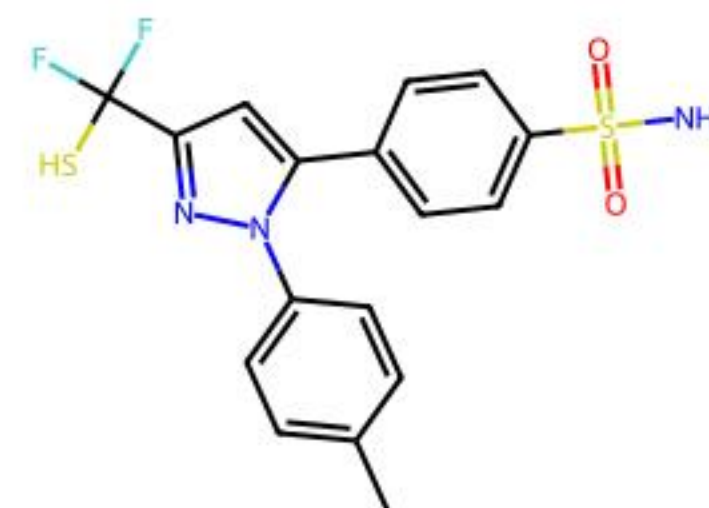

Reward: 0.87  
Cc1ccc(-n2nc(C(F)(F)S)cc2-c2ccc(S(N)(=O)=O)cc2)cc1

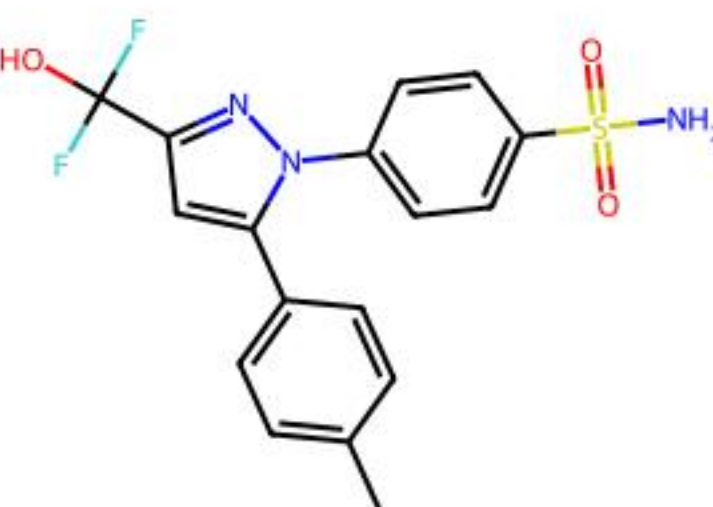

Reward: 0.87  
Cc1ccc(-c2cc(C(O)(F)F)nn2-c2ccc(S(N)(=O)=O)cc2)cc1
