# Supplementary material
Source: ML conference proceedings conference paper supplement (https://openreview.net/forum?id=Qdu92a5DiM)
Supplement: supplementary_material [file top_smiles_cuda:0.pdf › ICLR/plots/tdc/deco_hop/top_smiles_cuda:0.pdf]

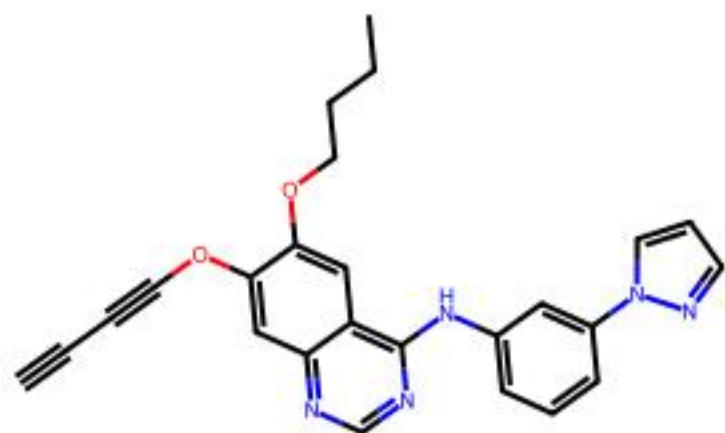

Reward: 0.99  
C#CC#COc1cc2ncnc(Nc3cccc(-n4cccn4)c3)c2cc1OCCCC

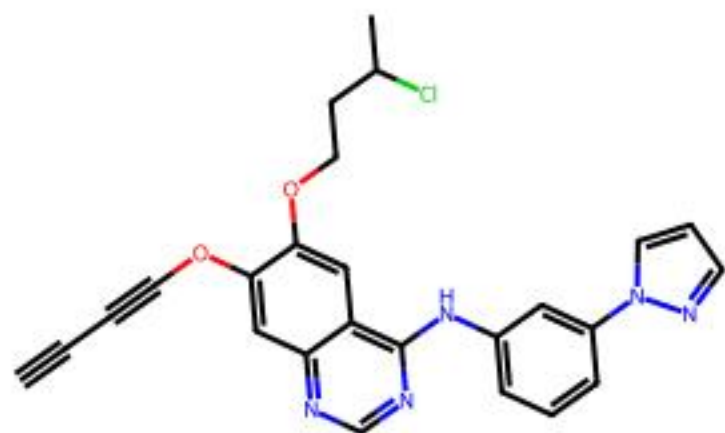

Reward: 0.99  
C#CC#COc1cc2ncnc(Nc3cccc(-n4cccn4)c3)c2cc1OCCC(C)Cl

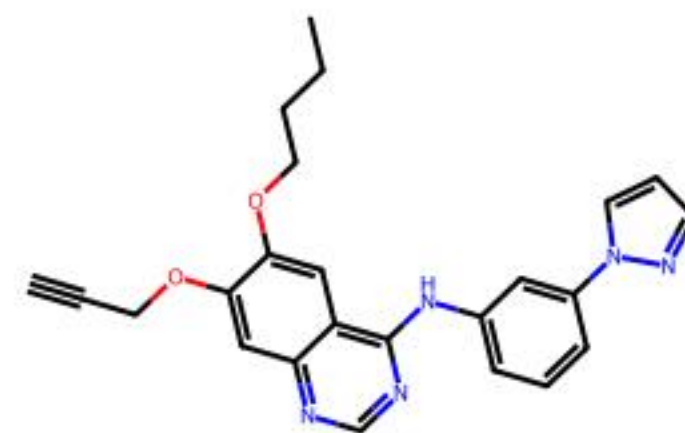

Reward: 0.99  
C#CCOc1cc2ncnc(Nc3cccc(-n4cccn4)c3)c2cc1OCCCC

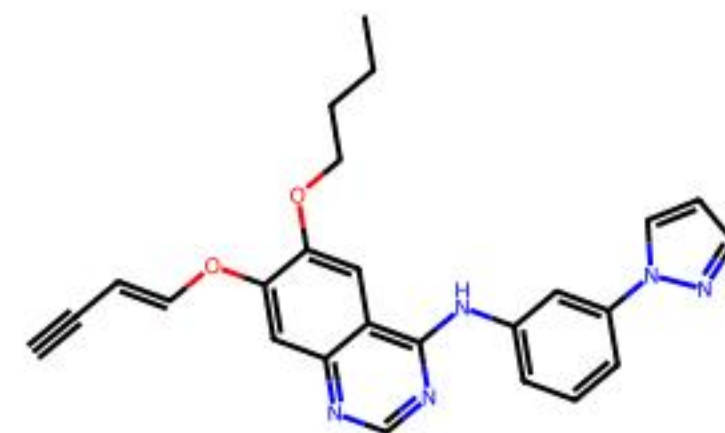

Reward: 0.99  
C#CC=COc1cc2ncnc(Nc3cccc(-n4cccn4)c3)c2cc1OCCCC

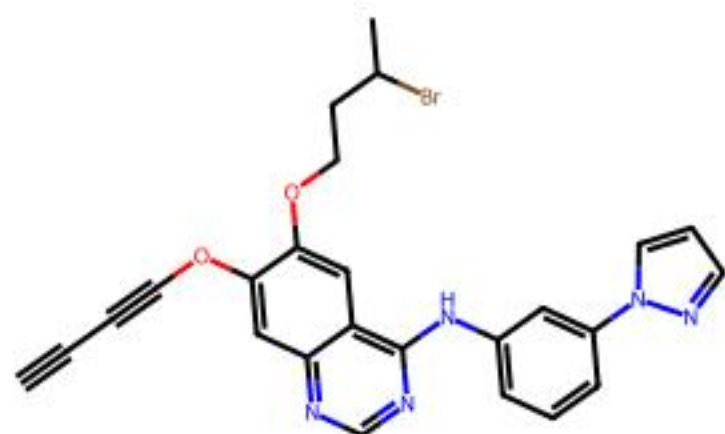

Reward: 0.99  
C#CC#COc1cc2ncnc(Nc3cccc(-n4cccn4)c3)c2cc1OCCC(C)Br

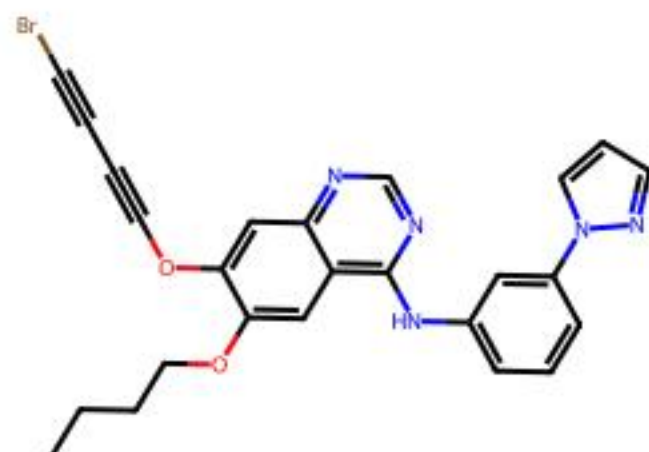

Reward: 0.99  
CCCCOc1cc2c(Nc3cccc(-n4cccn4)c3)ncnc2cc1OC#CC#CBr

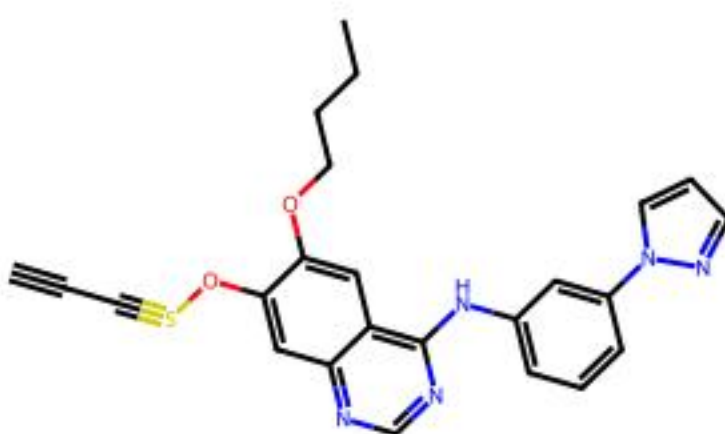

Reward: 0.99  
C#CC#SOc1cc2ncnc(Nc3cccc(-n4cccn4)c3)c2cc1OCCCC

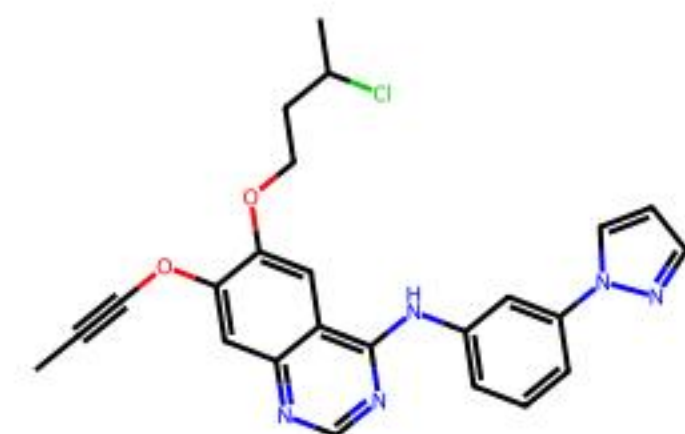

Reward: 0.99  
CC#COc1cc2ncnc(Nc3cccc(-n4cccn4)c3)c2cc1OCCC(C)Cl

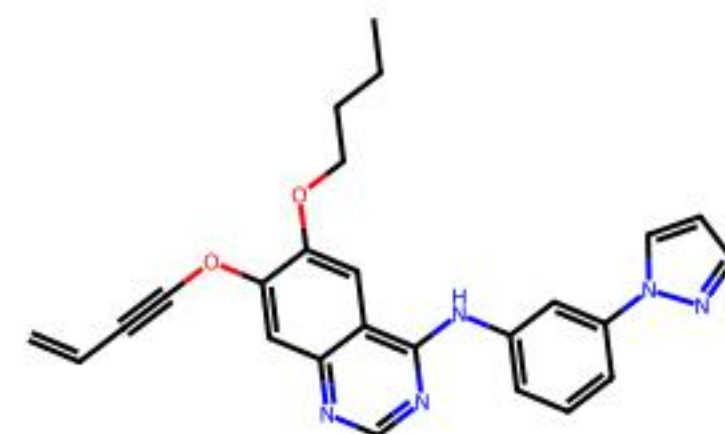

Reward: 0.99  
C=CC#COc1cc2ncnc(Nc3cccc(-n4cccn4)c3)c2cc1OCCCC

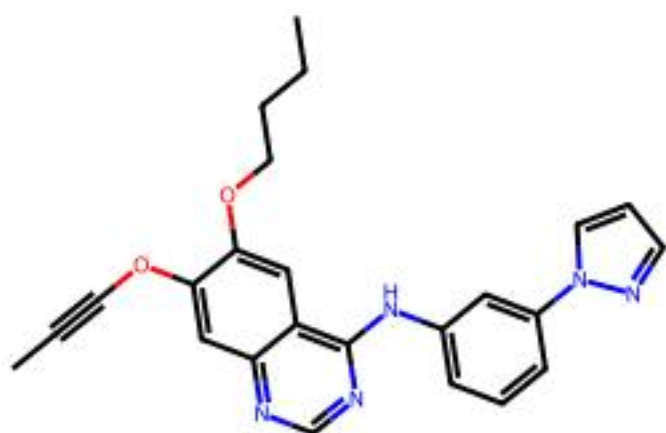

Reward: 0.99  
CC#COc1cc2ncnc(Nc3cccc(-n4cccn4)c3)c2cc1OCCCC
