# Supplementary material
Source: ML conference proceedings conference paper supplement (https://openreview.net/forum?id=Qdu92a5DiM)
Supplement: supplementary_material [file top_smiles_cuda:0.pdf › ICLR/plots/tdc/docking_parp1_idx0_thr4/top_smiles_cuda:0.pdf]

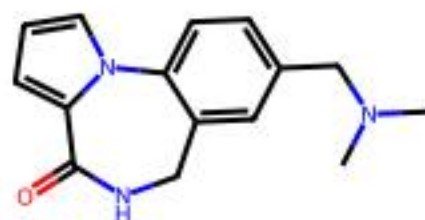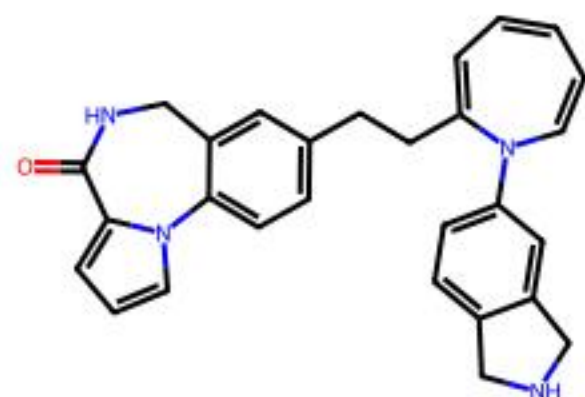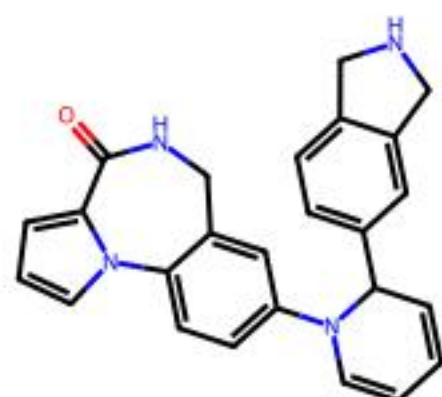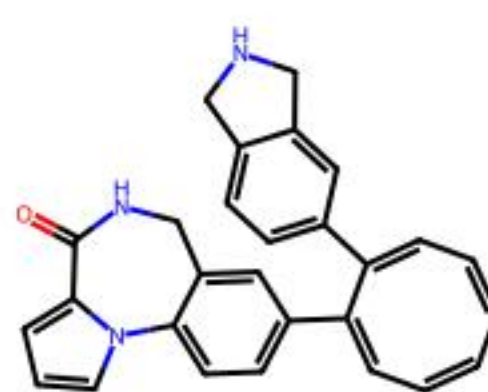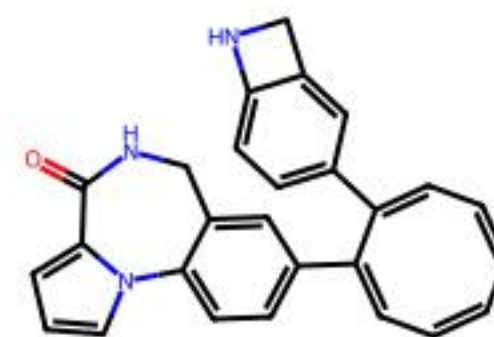

Target  
CN(C)Cc1ccc2c(c1)CNC(=O)c1cccn1-2

Reward: 12.67  
O=C1NCc2cc(CCC3=CC=CC=CN3c3ccc4c(c3)CNC4)ccc2-n2cccc21

Reward: 12.55  
O=C1NCc2cc(N3C=CC=CC3c3ccc4c(c3)CNC4)ccc2-n2cccc21

Reward: 12.53  
O=C1NCc2cc(C3=CC=CC=CC3c3ccc4c(c3)CNC4)ccc2-n2cccc21

Reward: 12.36  
O=C1NCc2cc(C3=CC=CC=CC3c3ccc4c(c3)CN4)ccc2-n2cccc21

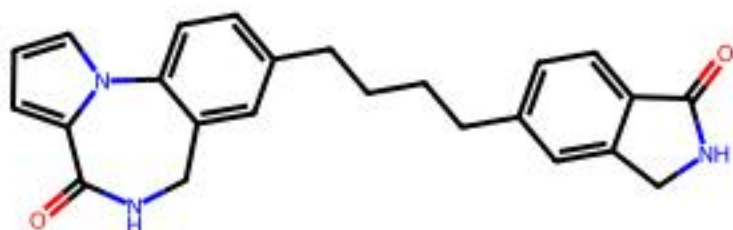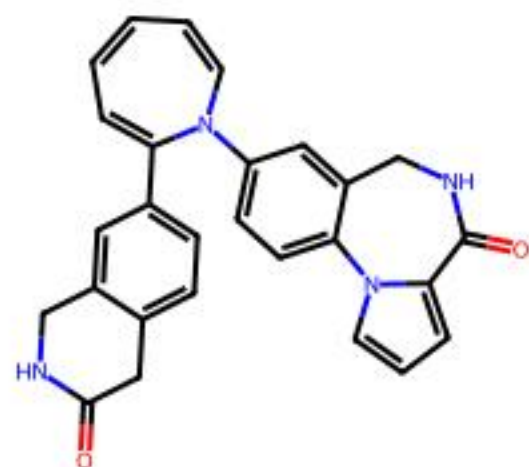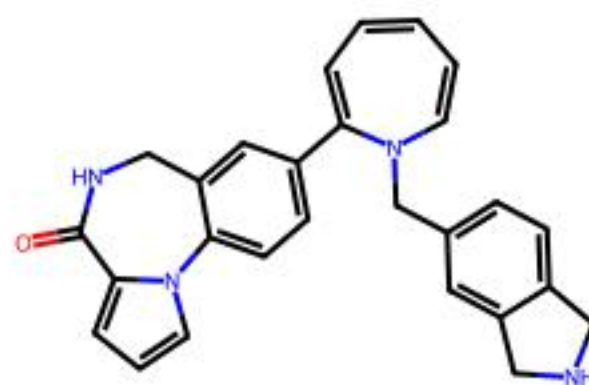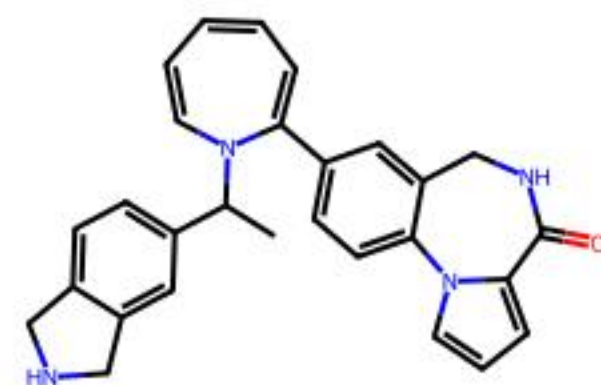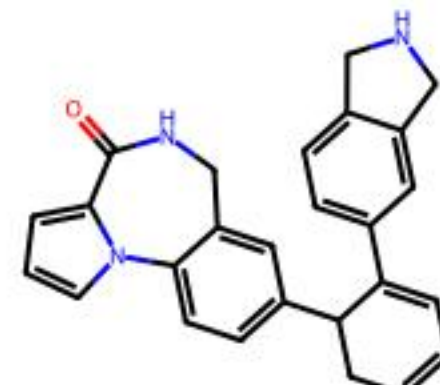

Reward: 12.36  
O=C1NCc2cc(CCCCc3ccc4c(c3)CNC(=O)c3cccn3-4)ccc21

Reward: 12.27  
O=C1Cc2ccc(C3=CC=CC=CN3c3ccc4c(c3)CNC(=O)c3cccn3-4)cc2CN1

Reward: 12.26  
O=C1NCc2cc(C3=CC=CC=CN3Cc3ccc4c(c3)CNC4)ccc2-n2cccc21

Reward: 12.23  
CC(c1ccc2c(c1)CNC2)N1C=CC=CC=C1c1ccc2c(c1)CNC(=O)c1cccn1-2

Reward: 12.14  
O=C1NCc2cc(C3CC=CC=C3c3ccc4c(c3)CNC4)ccc2-n2cccc21

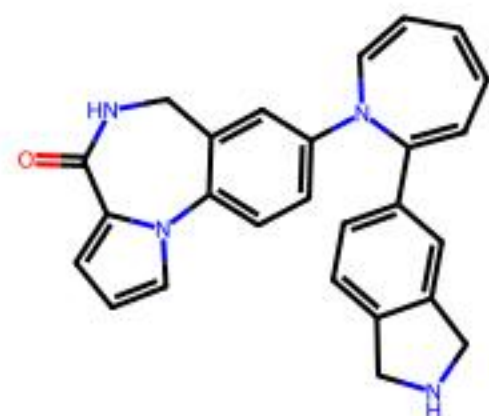

Reward: 12.10  
O=C1NCc2cc(N3C=CC=CC3c3ccc4c(c3)CNC4)ccc2-n2cccc21
