# Supplementary material
Source: ML conference proceedings conference paper supplement (https://openreview.net/forum?id=Qdu92a5DiM)
Supplement: supplementary_material [file top_smiles_cuda:0.pdf › ICLR/plots/tdc/drd2/top_smiles_cuda:0.pdf]

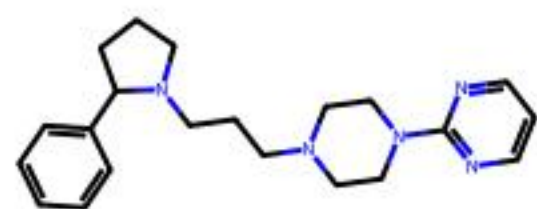

Reward: 1.00  
c1ccc(C2CCCN2CCCN2CCN(c3ncccc3)CC2)cc1

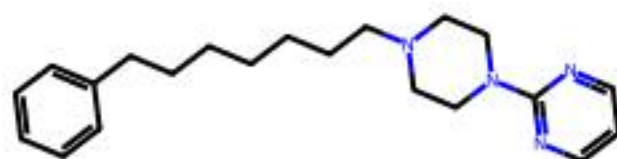

Reward: 1.00  
c1ccc(CCCCCCN2CCN(c3ncccc3)CC2)cc1

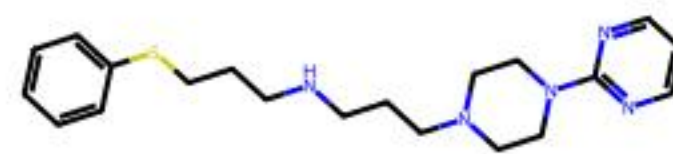

Reward: 1.00  
c1ccc(SCCCNCCCN2CCN(c3ncccc3)CC2)cc1

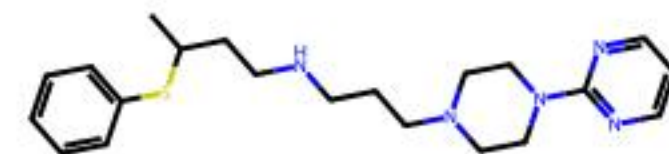

Reward: 1.00  
CC(CCNCCCN1CCN(c2ncccc2)CC1)Sc1ccccc1

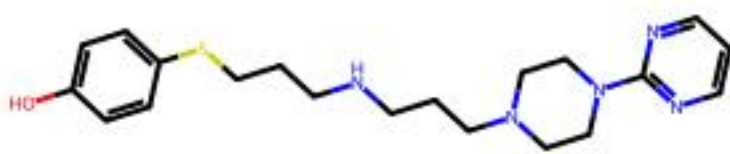

Reward: 1.00  
Oc1ccc(SCCCNCCCN2CCN(c3ncccc3)CC2)cc1

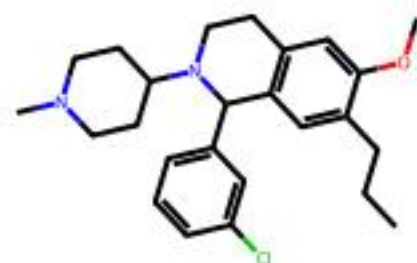

Reward: 1.00  
CCCc1cc2c(cc1OC)CCN(C1CCN(C)CC1)C2c1cccc(Cl)c1

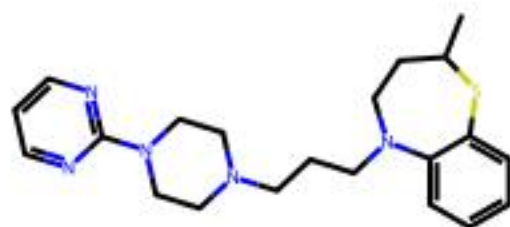

Reward: 0.99  
CC1CCN(CCCN2CCN(c3ncccc3)CC2)c2ccccc2S1

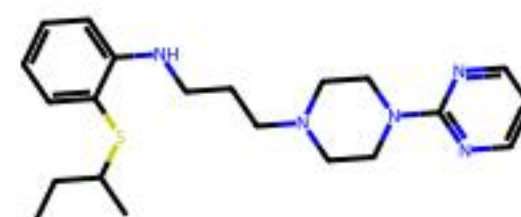

Reward: 0.99  
CCC(C)Sc1ccccc1NCCCN1CCN(c2ncccc2)CC1

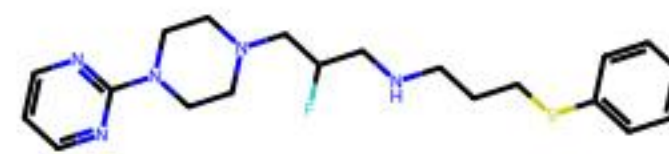

Reward: 0.99  
FC(CNCCCS1CCCCC1)CN1CCN(c2ncccc2)CC1

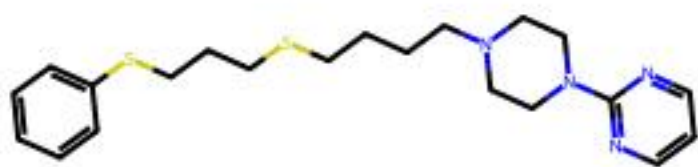

Reward: 0.99  
c1ccc(SCCCSCCCCN2CCN(c3ncccc3)CC2)cc1
