# Supplementary material
Source: ML conference proceedings conference paper supplement (https://openreview.net/forum?id=Qdu92a5DiM)
Supplement: supplementary_material [file top_smiles_cuda:0.pdf › ICLR/plots/tdc/fexofenadine_mpo/top_smiles_cuda:0.pdf]

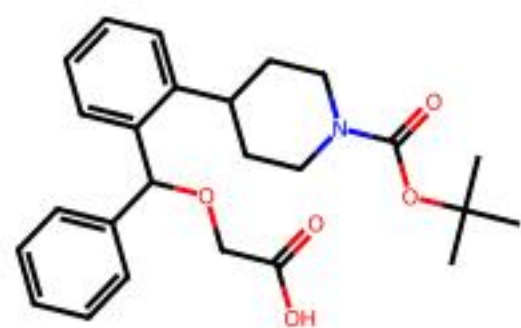

Target  
CC(C)(C)OC(=O)N1CCC(CC1)C2=CC=CC=C2C(C3=CC=CC=C3)OCC(=O)O

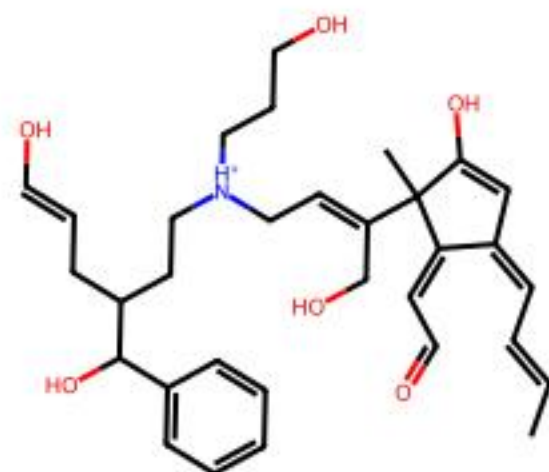

Reward: 0.88  
CC=CC=C1C=C(O)C(C)(C)=CC[NH+](CCCC)CCC(CC=CO)C(O)c2ccccc2CO)C1=CC=O

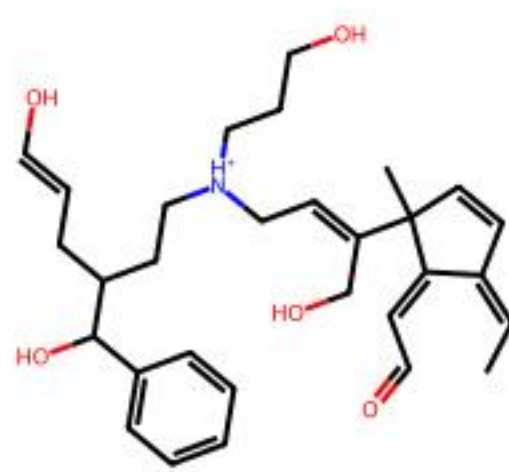

Reward: 0.88  
CC=C1C=CC(C)(C)=CC[NH+](CCCC)CCC(CC=CO)C(O)c2ccccc2CO)C1=CC=O

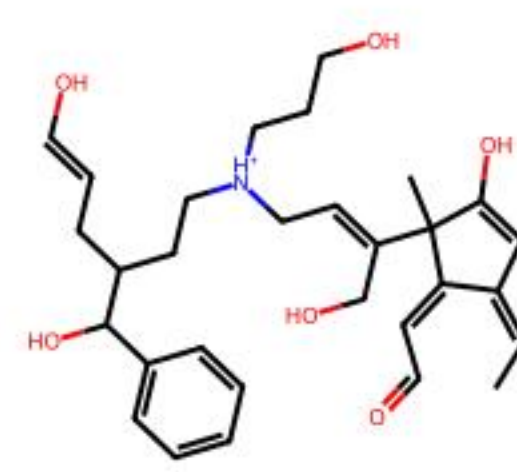

Reward: 0.88  
CC=C1C=C(O)C(C)(C)=CC[NH+](CCCC)CCC(CC=CO)C(O)c2ccccc2CO)C1=CC=O

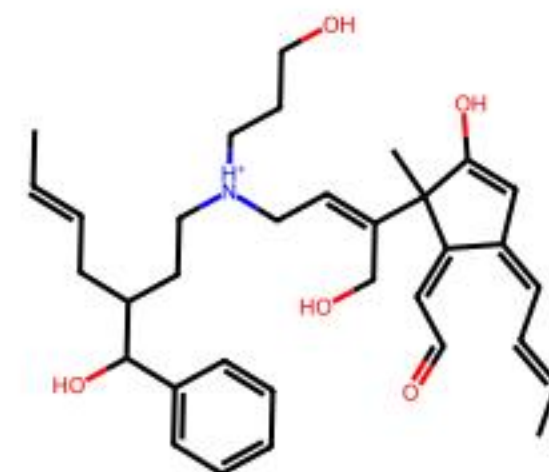

Reward: 0.88  
CC=CC=C1C=C(O)C(C)(C)=CC[NH+](CCCC)CCC(CC=CC)C(O)c2ccccc2CO)C1=CC=O

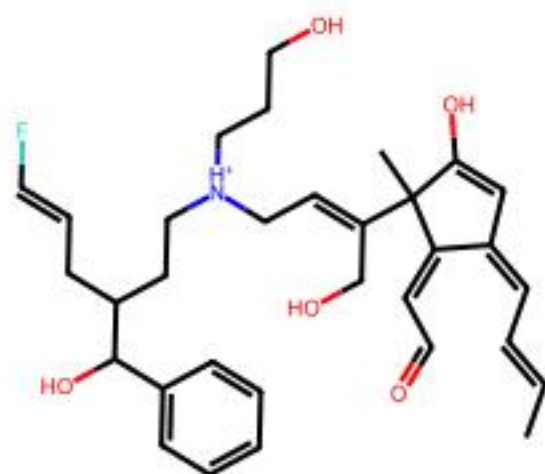

Reward: 0.88  
CC=CC=C1C=C(O)C(C)(C)=CC[NH+](CCCC)CCC(CC=CF)C(O)c2ccccc2CO)C1=CC=O

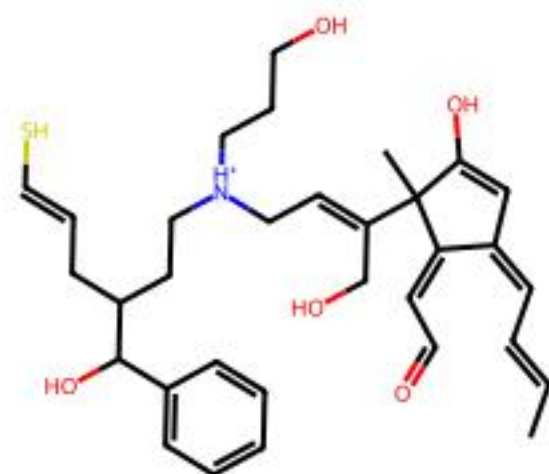

Reward: 0.88  
CC=CC=C1C=C(O)C(C)(C)=CC[NH+](CCCC)CCC(CC=C5)C(O)c2ccccc2CO)C1=CC=O

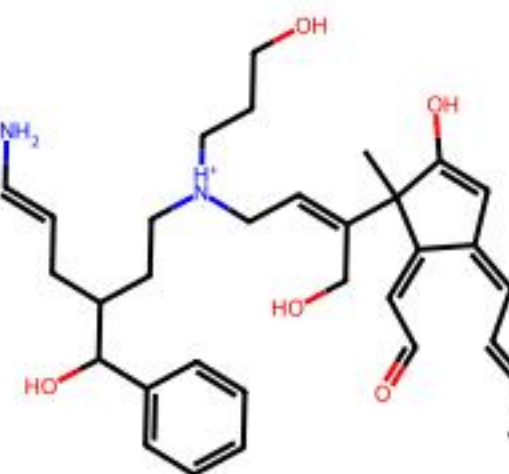

Reward: 0.88  
CC=CC=C1C=C(O)C(C)(C)=CC[NH+](CCCC)CCC(CC=CN)C(O)c2ccccc2CO)C1=CC=O

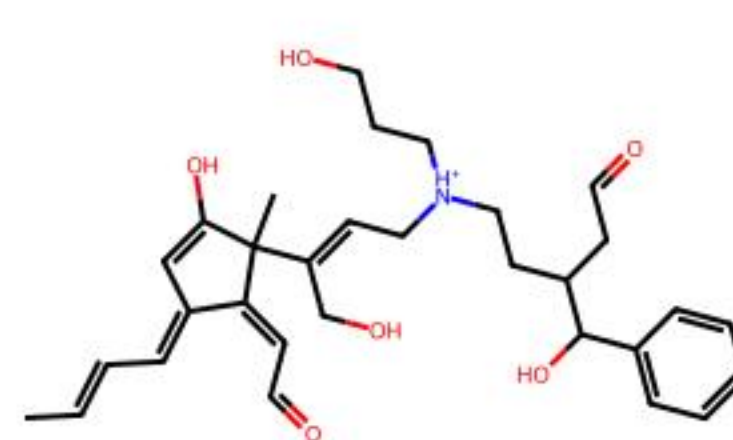

Reward: 0.88  
CC=CC=C1C=C(O)C(C)(C)=CC[NH+](CCCC)CCC(CC=O)C(O)c2ccccc2CO)C1=CC=O

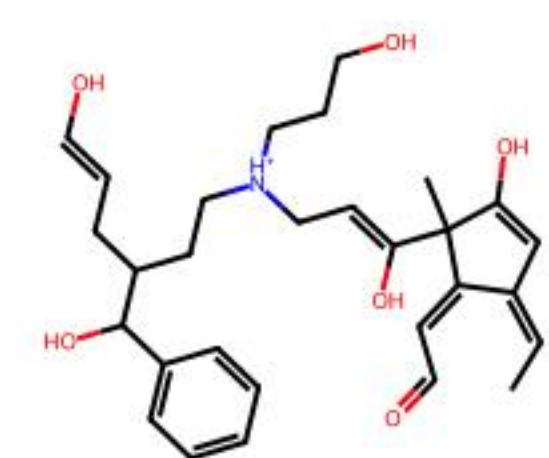

Reward: 0.88  
CC=C1C=C(O)C(C)(C)=CC[NH+](CCCC)CCC(CC=CO)C(O)c2ccccc2C1=CC=O

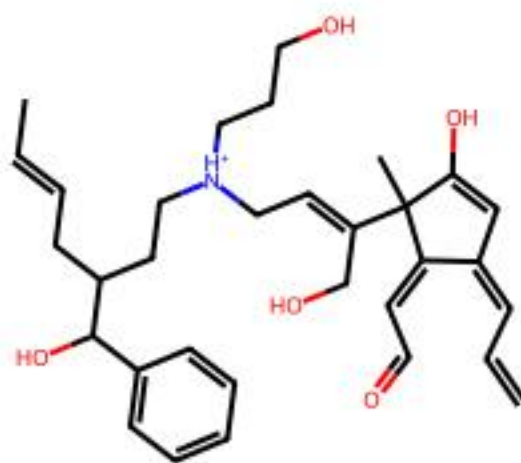

Reward: 0.88  
C=CC=C1C=C(O)C(C)(C)=CC[NH+](CCCC)CCC(CC=CC)C(O)c2ccccc2CO)C1=CC=O
