# Supplementary material
Source: ML conference proceedings conference paper supplement (https://openreview.net/forum?id=Qdu92a5DiM)
Supplement: supplementary_material [file top_smiles_cuda:0.pdf › ICLR/plots/tdc/gsk3b/top_smiles_cuda:0.pdf]

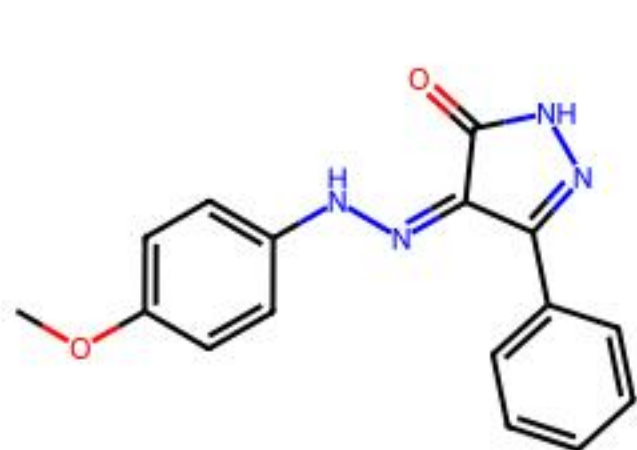

Reward: 1.00  
COc1ccc(NN=C2C(=O)NN=C2c2ccccc2)cc1

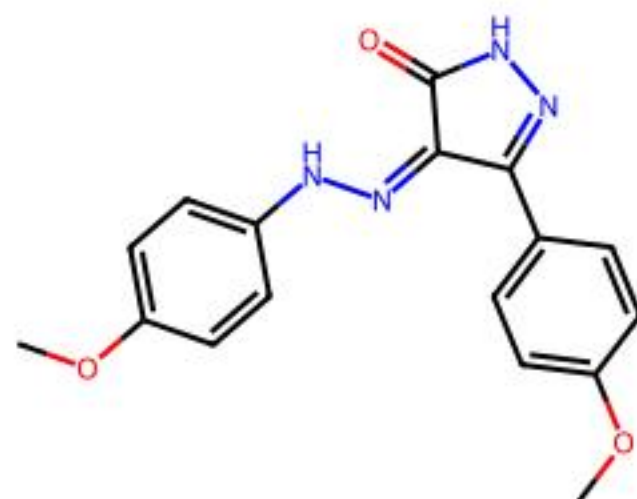

Reward: 1.00  
COc1ccc(NN=C2C(=O)NN=C2c2ccc(OC)cc2)cc1

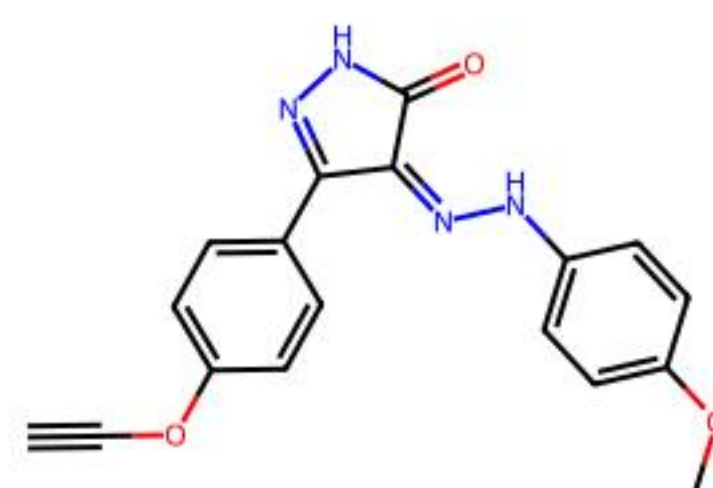

Reward: 1.00  
C#COc1ccc(C2=NNC(=O)C2=NNc2ccc(OC)cc2)cc1

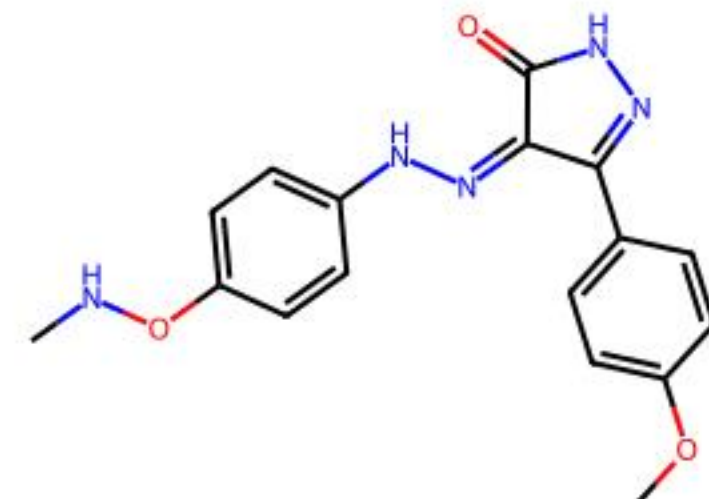

Reward: 1.00  
CNOc1ccc(NN=C2C(=O)NN=C2c2ccc(OC)cc2)cc1

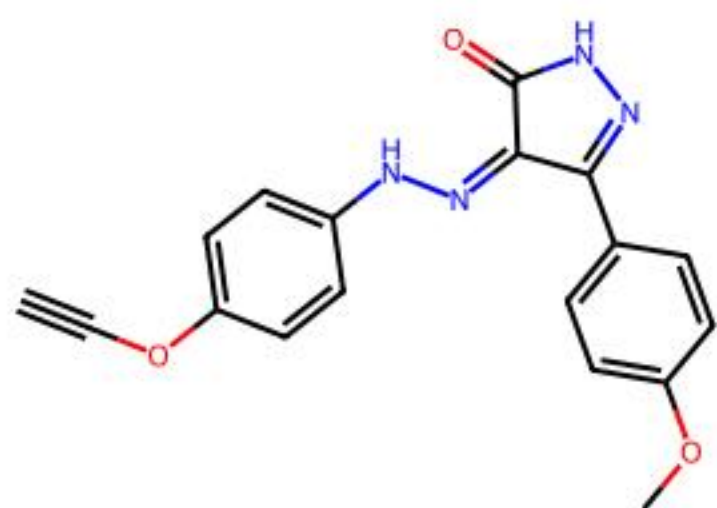

Reward: 1.00  
C#COc1ccc(NN=C2C(=O)NN=C2c2ccc(OC)cc2)cc1

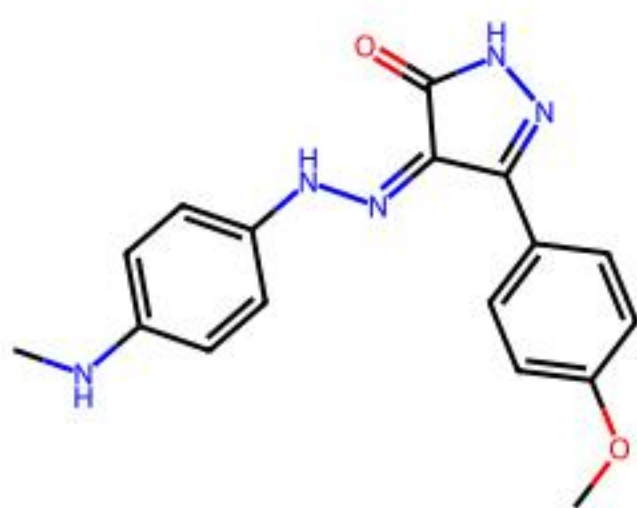

Reward: 1.00  
CNc1ccc(NN=C2C(=O)NN=C2c2ccc(OC)cc2)cc1

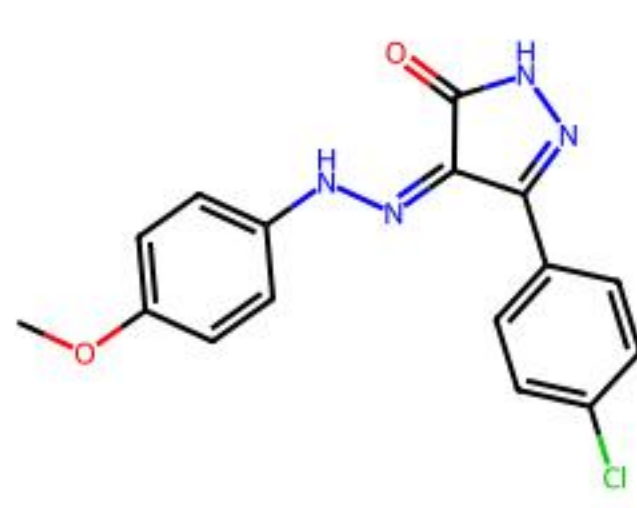

Reward: 1.00  
COc1ccc(NN=C2C(=O)NN=C2c2ccc(Cl)cc2)cc1

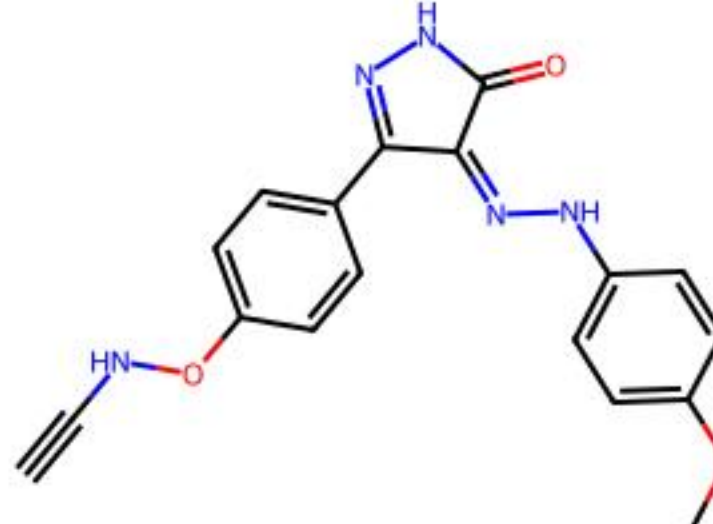

Reward: 1.00  
C#CNOc1ccc(C2=NNC(=O)C2=NNc2ccc(OC)cc2)cc1

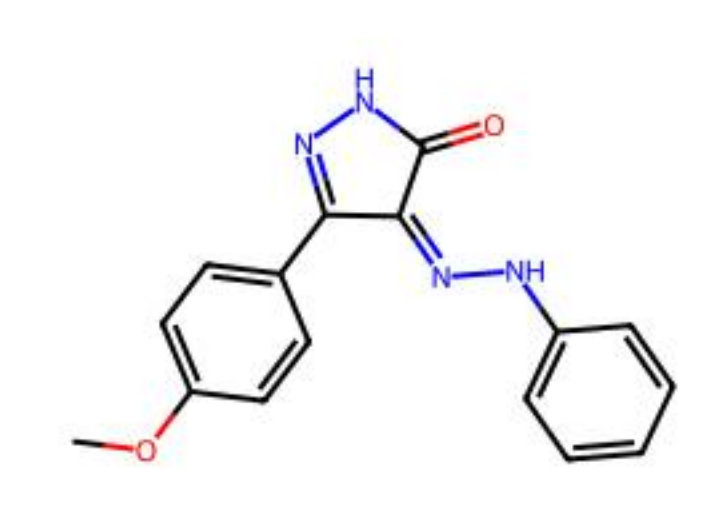

Reward: 0.99  
COc1ccc(C2=NNC(=O)C2=NNc2ccccc2)cc1

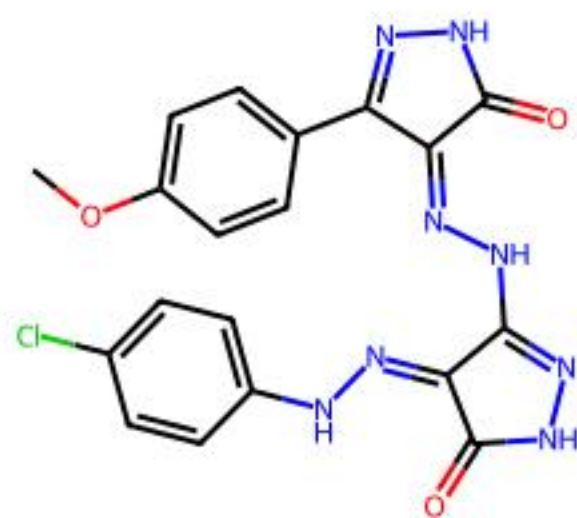

Reward: 0.99  
COc1ccc(C2=NNC(=O)C2=NNC2=NNC(=O)C2=NNc2ccc(Cl)cc2)cc1
