# Supplementary material
Source: ML conference proceedings conference paper supplement (https://openreview.net/forum?id=Qdu92a5DiM)
Supplement: supplementary_material [file top_smiles_cuda:0.pdf › ICLR/plots/tdc/isomers_c7h8n2o2/top_smiles_cuda:0.pdf]

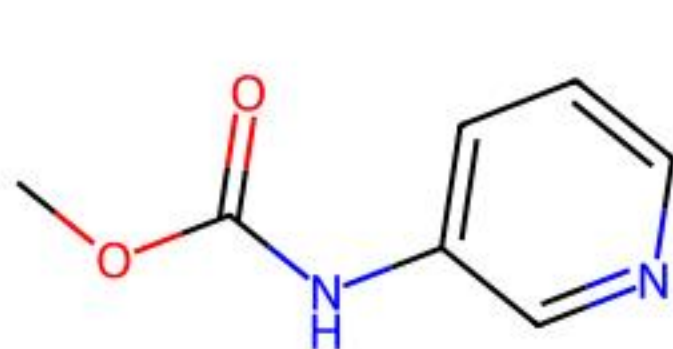

Reward: 1.00  
COC(=O)Nc1cccnc1

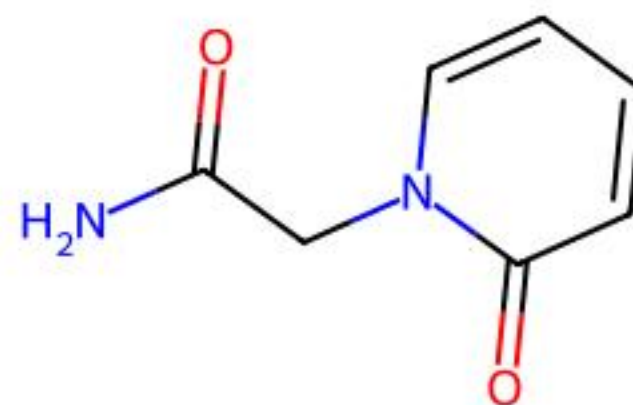

Reward: 1.00  
NC(=O)Cn1cccc1=O

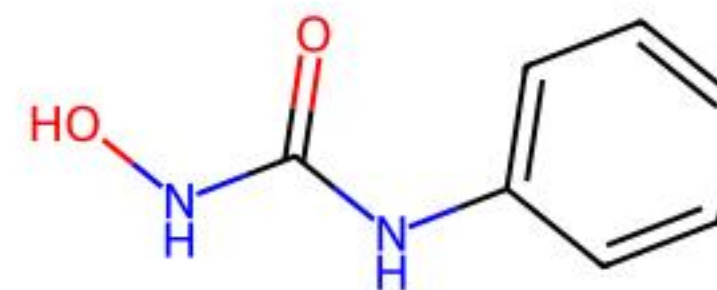

Reward: 1.00  
O=C(NO)Nc1cccc1

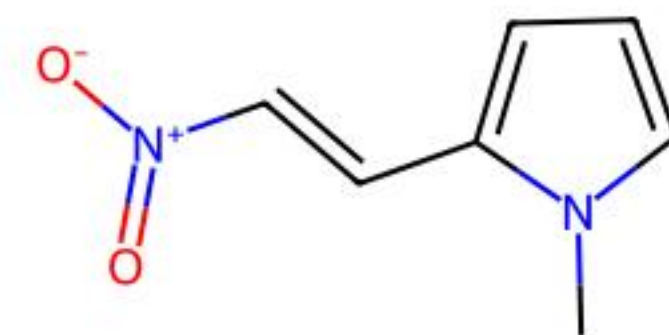

Reward: 1.00  
Cn1cccc1C=C[N+](=O)[O-]

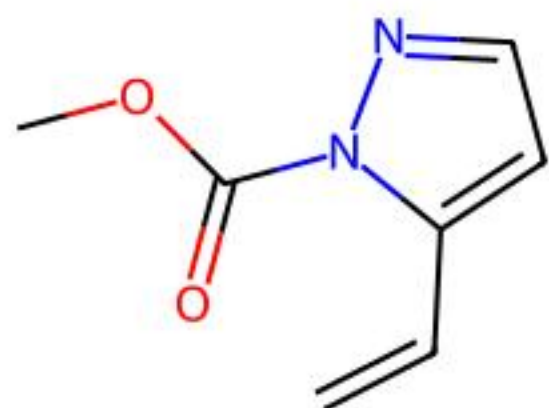

Reward: 1.00  
C=Cc1ccnn1C(=O)OC

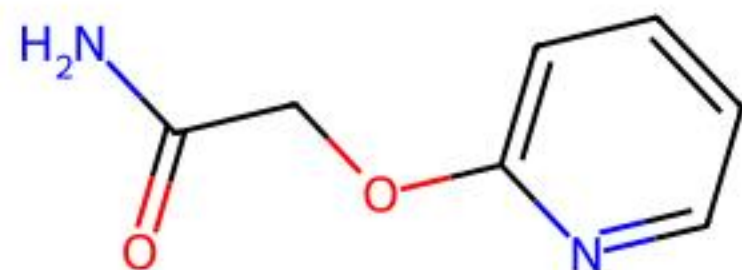

Reward: 1.00  
NC(=O)COC1CCCCN1

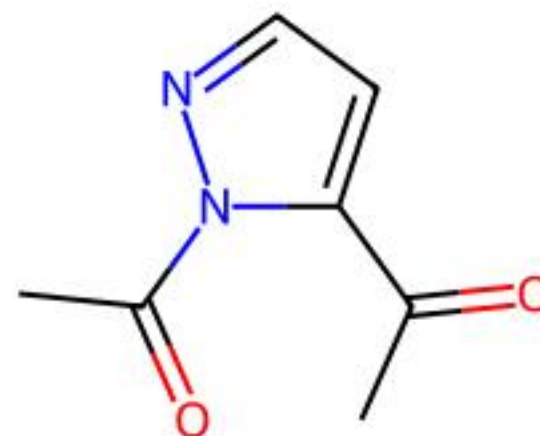

Reward: 1.00  
CC(=O)c1ccnn1C(C)=O

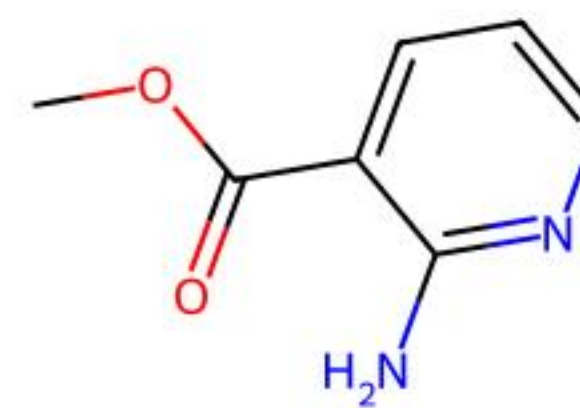

Reward: 1.00  
COC(=O)c1cccnc1N

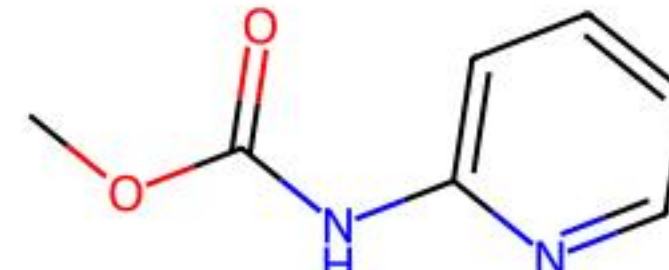

Reward: 1.00  
COC(=O)Nc1ccccn1

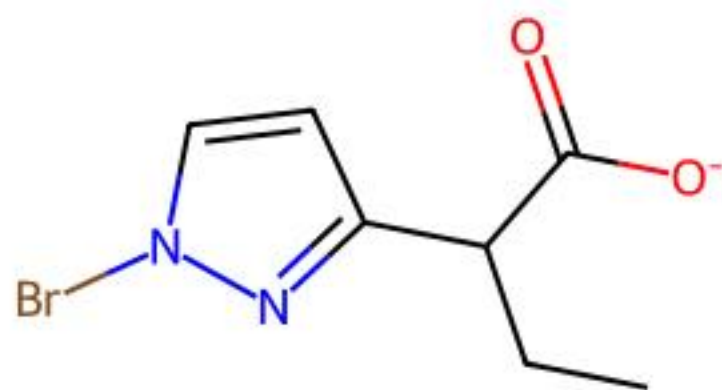

Reward: 0.98  
CCC(C(=O)[O-])c1ccn(Br)n1
