# Supplementary material
Source: ML conference proceedings conference paper supplement (https://openreview.net/forum?id=Qdu92a5DiM)
Supplement: supplementary_material [file top_smiles_cuda:0.pdf › ICLR/plots/tdc/isomers_c9h10n2o2pf2cl/top_smiles_cuda:0.pdf]

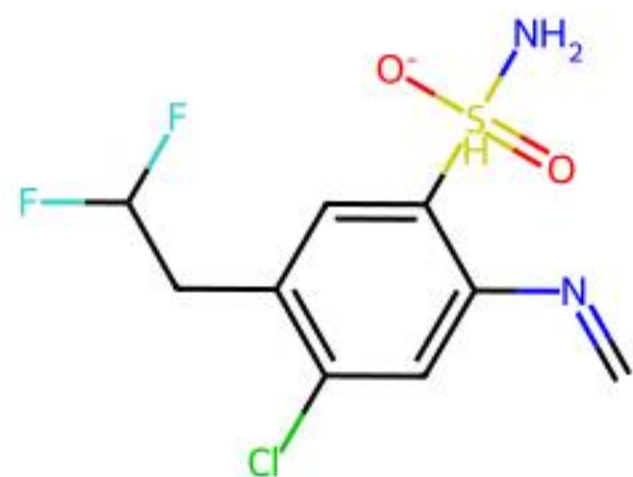

Reward: 0.94  
C=Nc1cc(Cl)c(CC(F)F)cc1[SH](N)(=O)[O-]

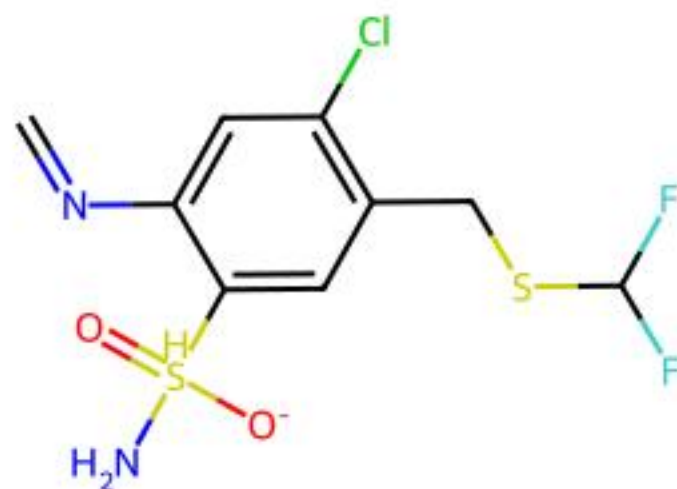

Reward: 0.92  
C=Nc1cc(Cl)c(CSC(F)F)cc1[SH](N)(=O)[O-]

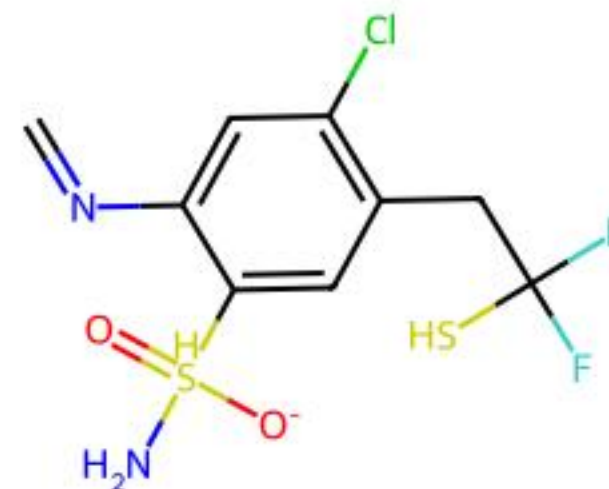

Reward: 0.92  
C=Nc1cc(Cl)c(CC(F)(F)S)cc1[SH](N)(=O)[O-]

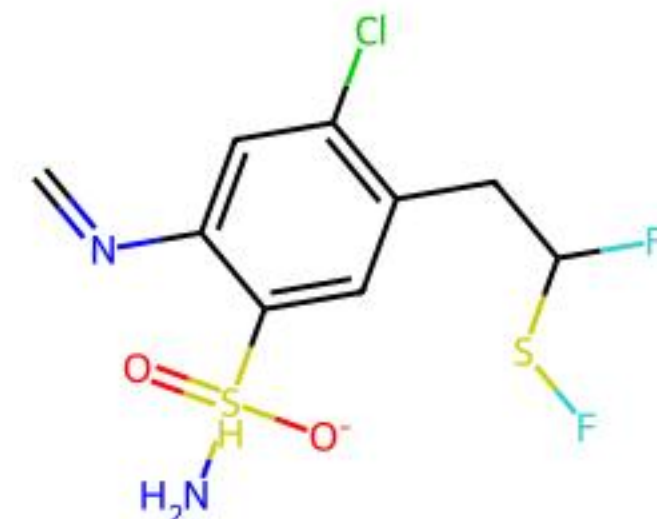

Reward: 0.92  
C=Nc1cc(Cl)c(CC(F)SF)cc1[SH](N)(=O)[O-]

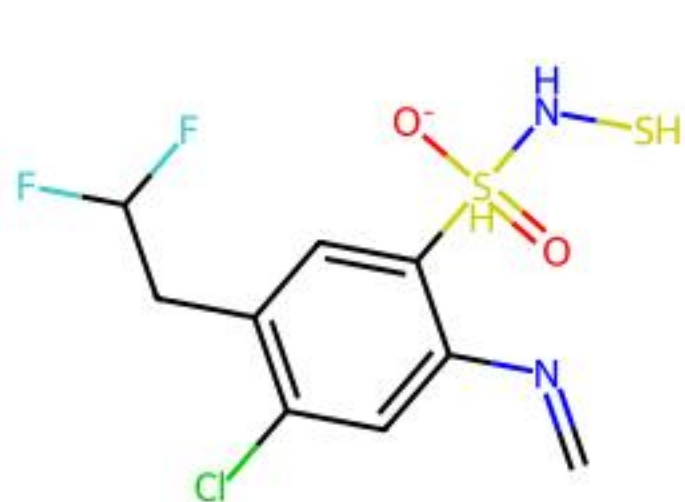

Reward: 0.92  
C=Nc1cc(Cl)c(CC(F)F)cc1[SH](=O)([O-])NS

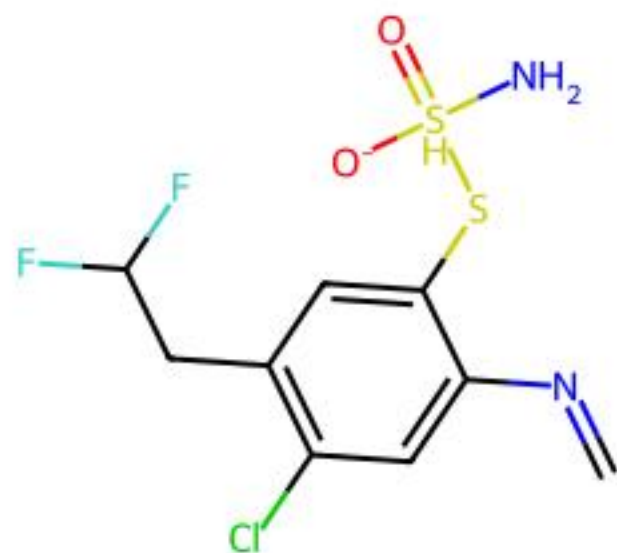

Reward: 0.92  
C=Nc1cc(Cl)c(CC(F)F)cc1S[SH](N)(=O)[O-]

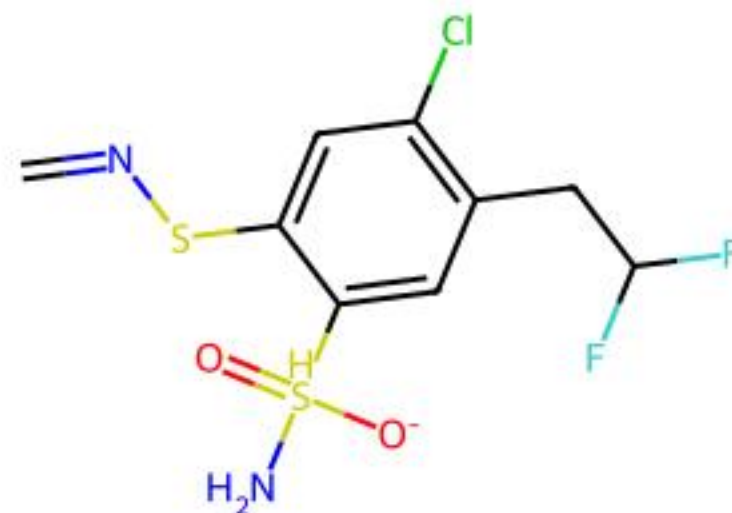

Reward: 0.92  
C=NSc1cc(Cl)c(CC(F)F)cc1[SH](N)(=O)[O-]

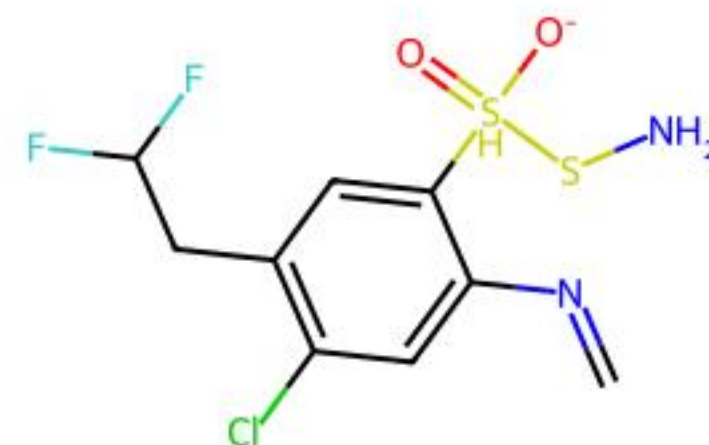

Reward: 0.92  
C=Nc1cc(Cl)c(CC(F)F)cc1[SH](=O)([O-])SN

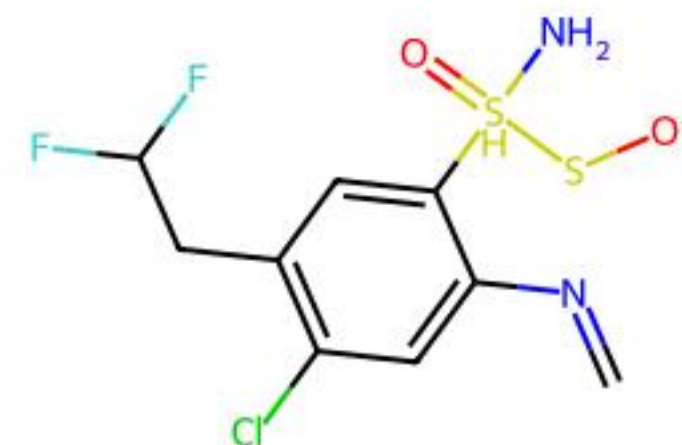

Reward: 0.92  
C=Nc1cc(Cl)c(CC(F)F)cc1[SH](N)(=O)S[O-]

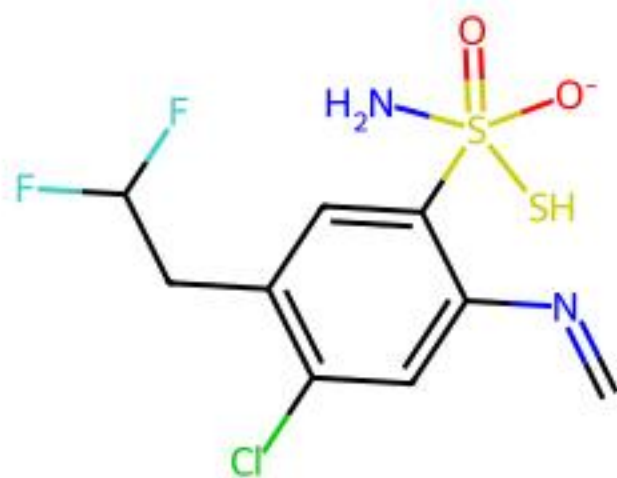

Reward: 0.92  
C=Nc1cc(Cl)c(CC(F)F)cc1S(N)(=O)([O-])S
