# Supplementary material
Source: ML conference proceedings conference paper supplement (https://openreview.net/forum?id=Qdu92a5DiM)
Supplement: supplementary_material [file top_smiles_cuda:0.pdf › ICLR/plots/tdc/jnk3/top_smiles_cuda:0.pdf]

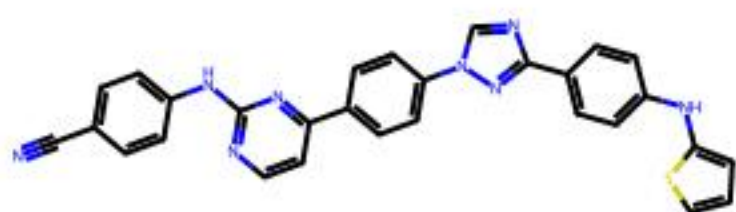

Reward: 0.98  
N#Cc1ccc(Nc2nccc(-c3ccc(-n4cnc(-c5ccc(Nc6cccs6)cc5)n4)cc3)n2)cc1

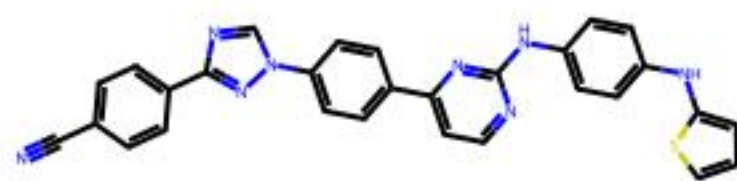

Reward: 0.98  
N#Cc1ccc(-c2nnc(-c3ccc(-c4ccnc(Nc5ccc(Nc6cccs6)cc5)n4)cc3)n2)cc1

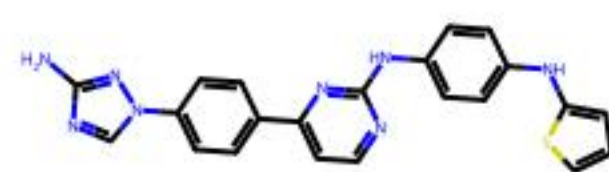

Reward: 0.97  
Nc1ncn(-c2ccc(-c3ccnc(Nc4ccc(Nc5cccs5)cc4)n3)cc2)n1

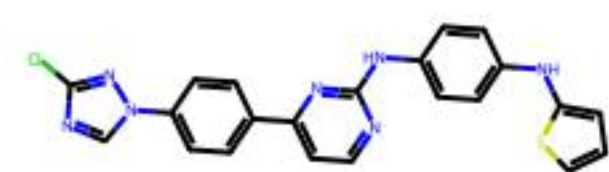

Reward: 0.97  
Clc1ncn(-c2ccc(-c3ccnc(Nc4ccc(Nc5cccs5)cc4)n3)cc2)n1

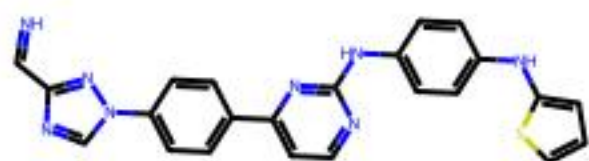

Reward: 0.97  
N=Cc1ncn(-c2ccc(-c3ccnc(Nc4ccc(Nc5cccs5)cc4)n3)cc2)n1

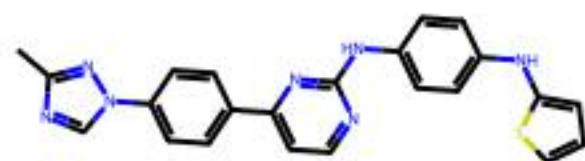

Reward: 0.97  
Cc1ncn(-c2ccc(-c3ccnc(Nc4ccc(Nc5cccs5)cc4)n3)cc2)n1

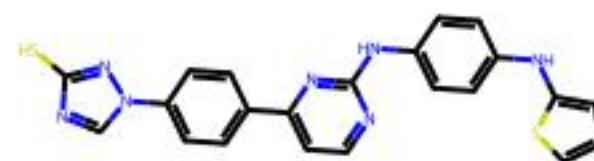

Reward: 0.97  
Fc1ncn(-c2ccc(-c3ccnc(Nc4ccc(Nc5cccs5)cc4)n3)cc2)n1

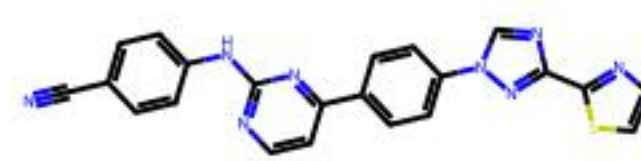

Reward: 0.97  
N#Cc1ccc(Nc2nccc(-c3ccc(-n4cnc(-c5nccs5)n4)cc3)n2)cc1

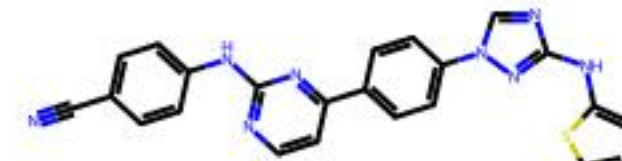

Reward: 0.97  
N#Cc1ccc(Nc2nccc(-c3ccc(-n4cnc(Nc5cccs5)n4)cc3)n2)cc1

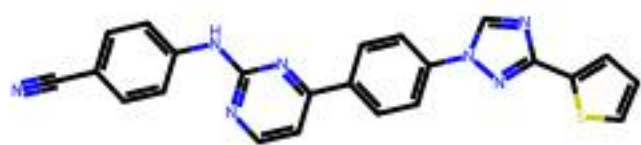

Reward: 0.97  
N#Cc1ccc(Nc2nccc(-c3ccc(-n4cnc(-c5cccs5)n4)cc3)n2)cc1
