# Supplementary material
Source: ML conference proceedings conference paper supplement (https://openreview.net/forum?id=Qdu92a5DiM)
Supplement: supplementary_material [file top_smiles_cuda:0.pdf › ICLR/plots/tdc/median1/top_smiles_cuda:0.pdf]

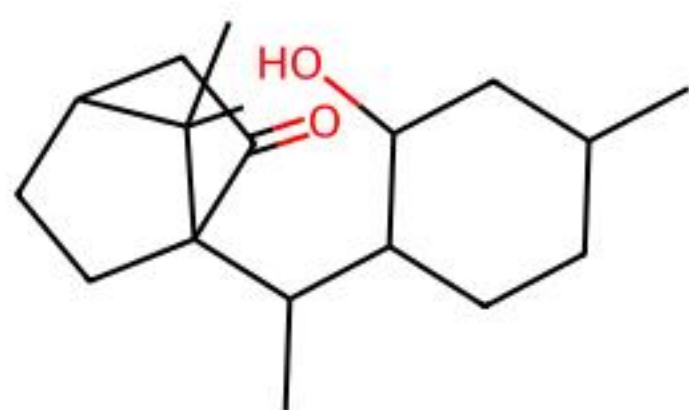

Reward: 0.41  
CC1CCC(C(C)C23CCC(CC2=O)C3(C)C)C(O)C1

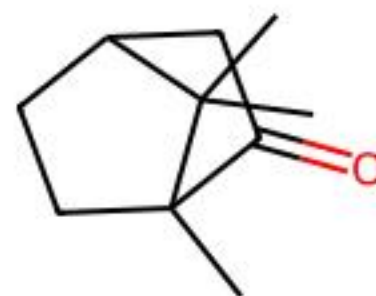

Reward: 0.40  
CC12CCC(CC1=O)C2(C)C

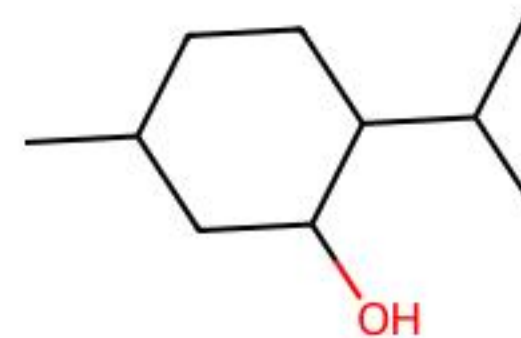

Reward: 0.40  
CC1CCC(C(C)C)C(O)C1

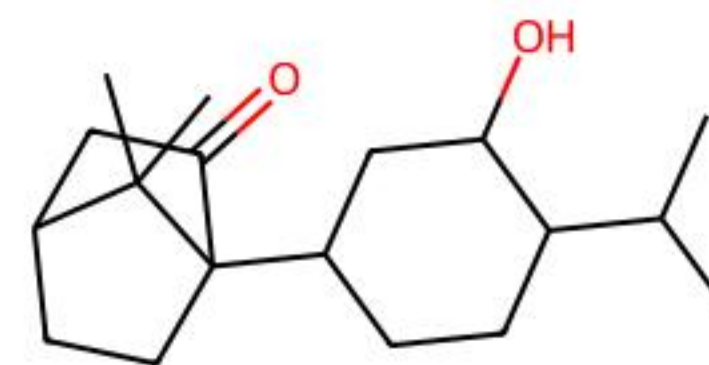

Reward: 0.39  
CC(C)C1CCC(C23CCC(CC2=O)C3(C)C)CC1O

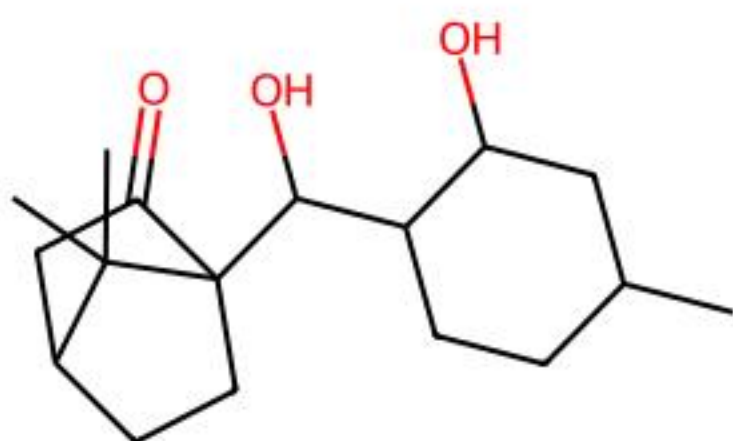

Reward: 0.39  
CC1CCC(C(O)C23CCC(CC2=O)C3(C)C)C(O)C1

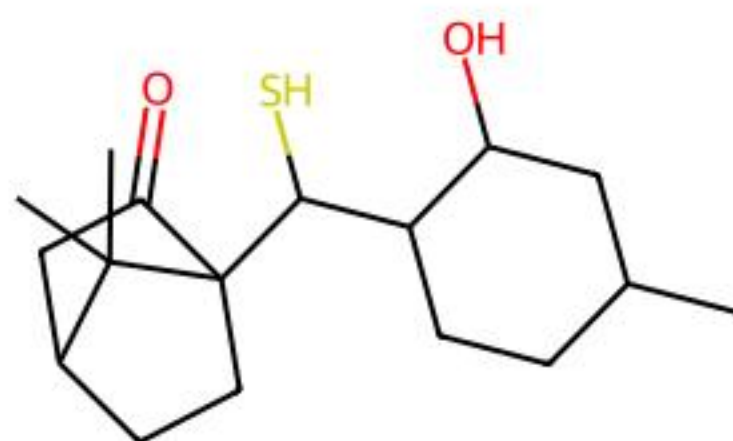

Reward: 0.39  
CC1CCC(C(S)C23CCC(CC2=O)C3(C)C)C(O)C1

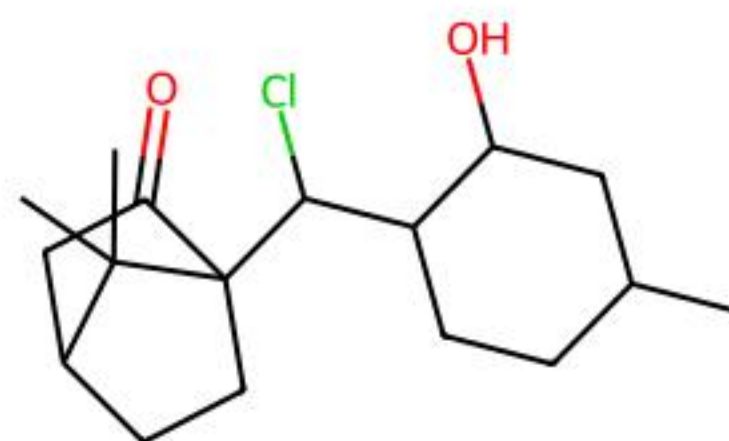

Reward: 0.39  
CC1CCC(C(Cl)C23CCC(CC2=O)C3(C)C)C(O)C1

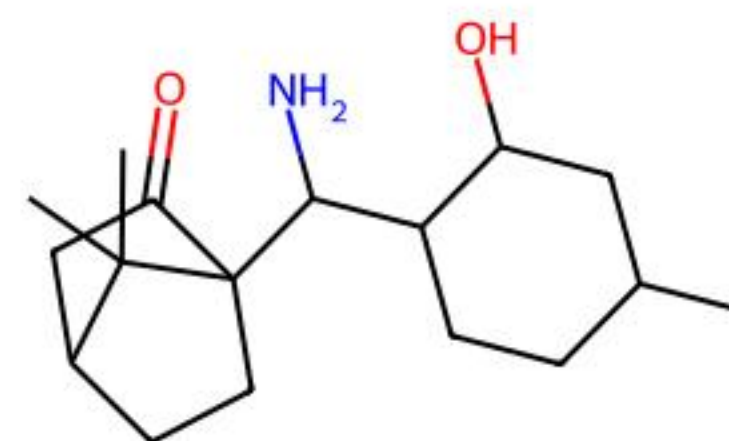

Reward: 0.39  
CC1CCC(C(N)C23CCC(CC2=O)C3(C)C)C(O)C1

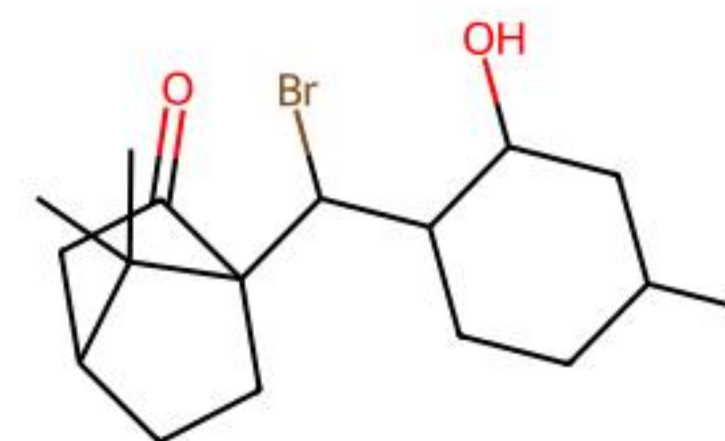

Reward: 0.39  
CC1CCC(C(Br)C23CCC(CC2=O)C3(C)C)C(O)C1

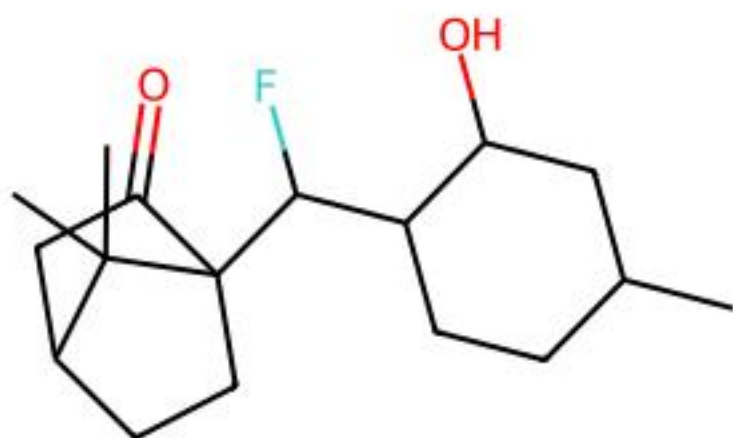

Reward: 0.39  
CC1CCC(C(F)C23CCC(CC2=O)C3(C)C)C(O)C1
