# Supplementary material
Source: ML conference proceedings conference paper supplement (https://openreview.net/forum?id=Qdu92a5DiM)
Supplement: supplementary_material [file top_smiles_cuda:0.pdf › ICLR/plots/tdc/median2/top_smiles_cuda:0.pdf]

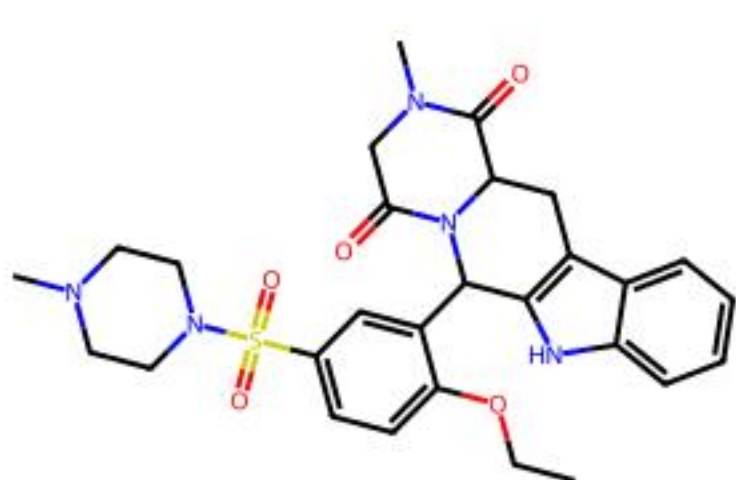

Reward: 0.41  
CCOc1ccc(S(=O)(=O)N2CCN(C)CC2)cc1C1C2[nH]c3ccccc3c2CC2C(=O)N(C)CC(=O)N21

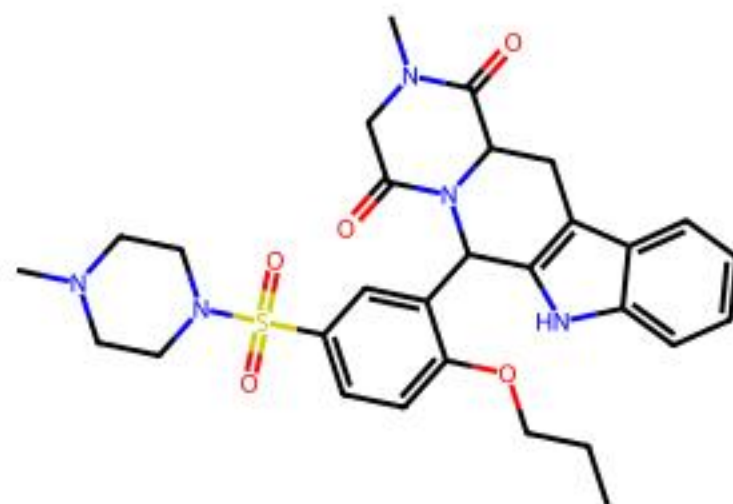

Reward: 0.40  
CCCCOc1ccc(S(=O)(=O)N2CCN(C)CC2)cc1C1C2[nH]c3ccccc3c2CC2C(=O)N(C)CC(=O)N21

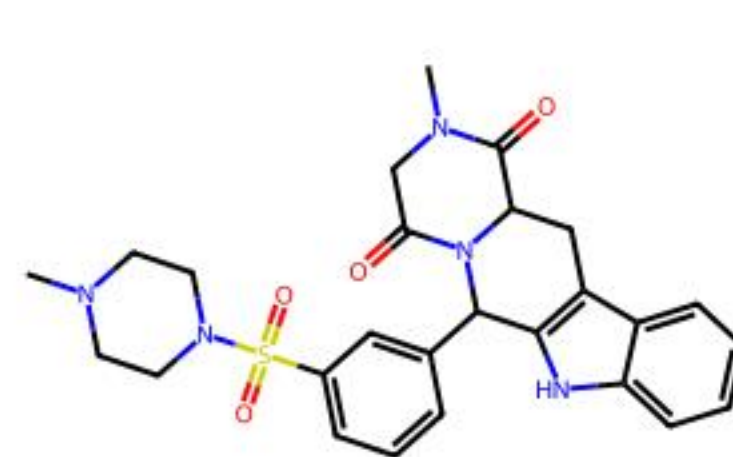

Reward: 0.40  
CN1CCN(S(=O)(=O)c2ccccc2C3c4[nH]c5ccccc5c4CC4C(=O)N(C)CC(=O)N43)c2)CC1

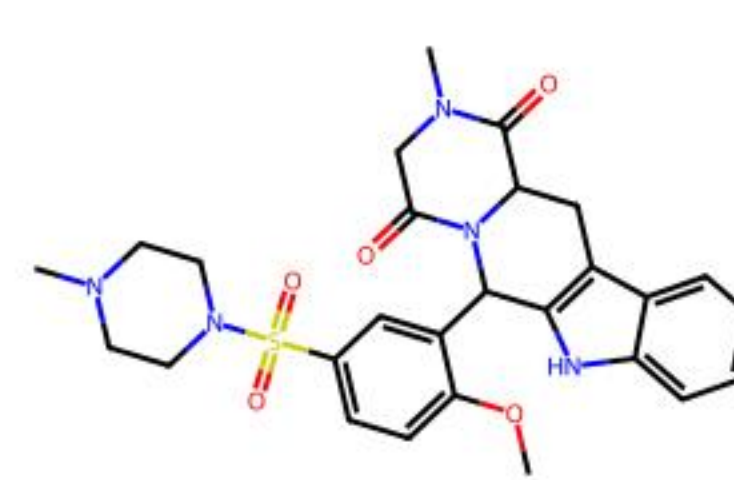

Reward: 0.40  
COc1ccc(S(=O)(=O)N2CCN(C)CC2)cc1C1C2[nH]c3ccccc3c2CC2C(=O)N(C)CC(=O)N21

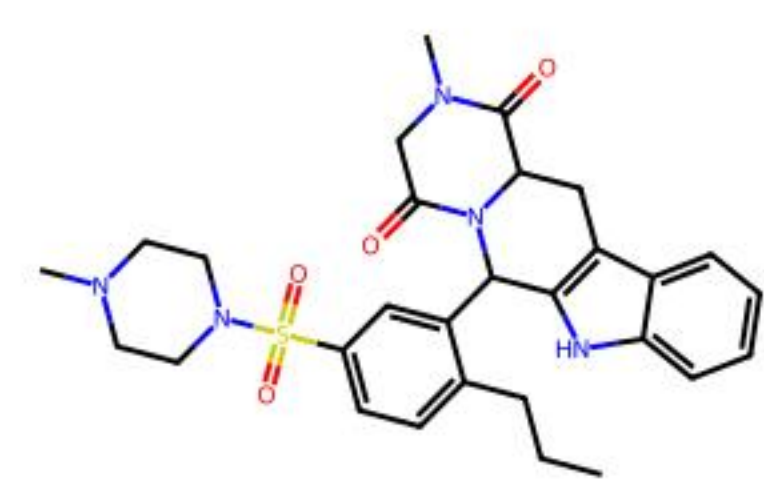

Reward: 0.40  
CCCCc1ccc(S(=O)(=O)N2CCN(C)CC2)cc1C1C2[nH]c3ccccc3c2CC2C(=O)N(C)CC(=O)N21

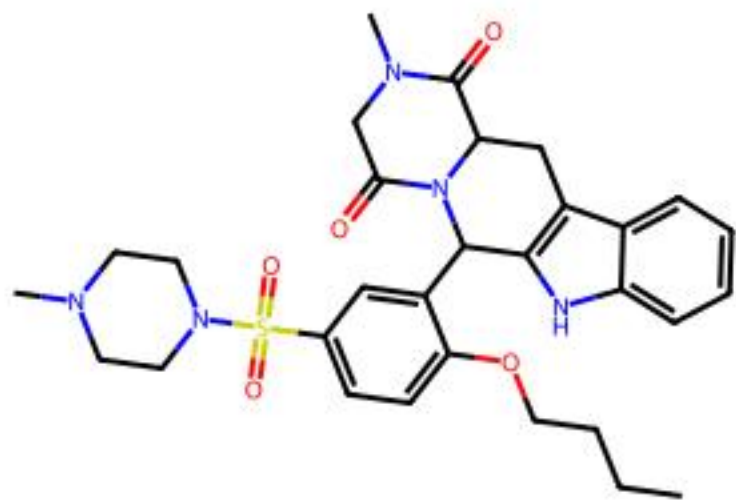

Reward: 0.40  
CCCCOc1ccc(S(=O)(=O)N2CCN(C)CC2)cc1C1C2[nH]c3ccccc3c2CC2C(=O)N(C)CC(=O)N21

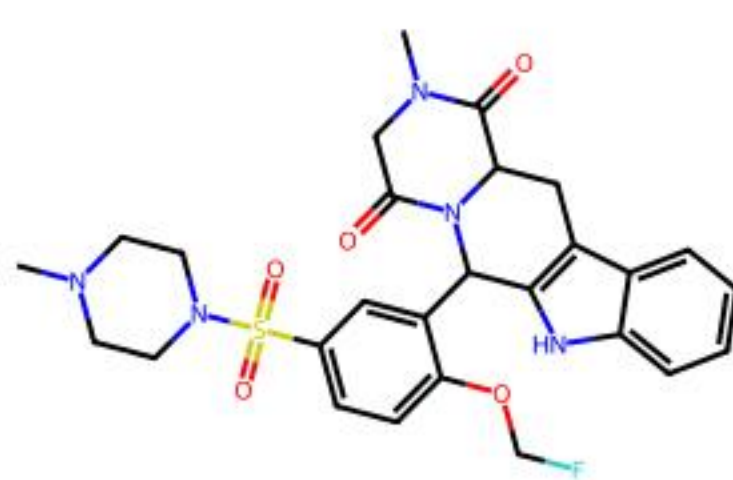

Reward: 0.39  
CN1CCN(S(=O)(=O)c2ccccc2OCF)c(C3c4[nH]c5ccccc5c4CC4C(=O)N(C)CC(=O)N43)c2)CC1

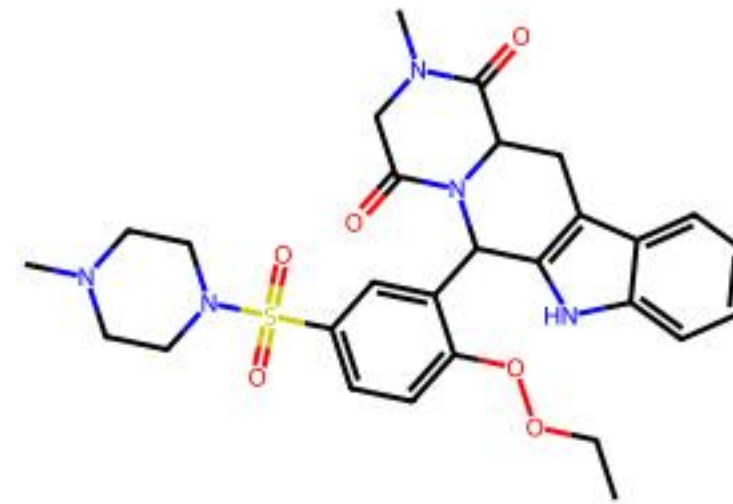

Reward: 0.39  
CCOCc1ccc(S(=O)(=O)N2CCN(C)CC2)cc1C1C2[nH]c3ccccc3c2CC2C(=O)N(C)CC(=O)N21

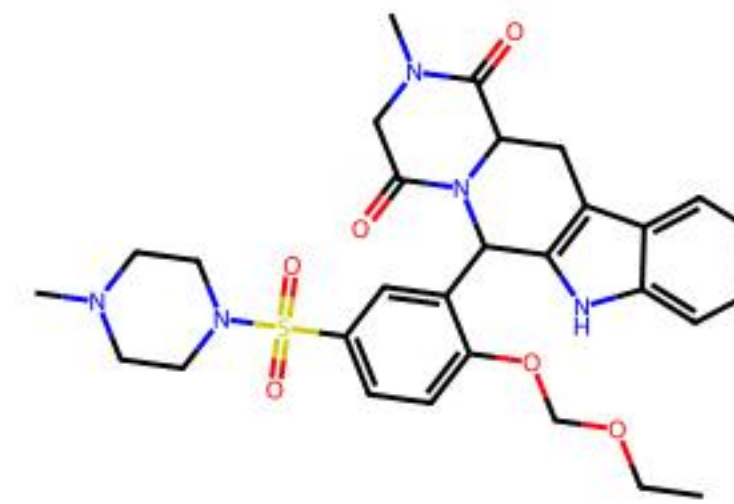

Reward: 0.39  
CCOCOCc1ccc(S(=O)(=O)N2CCN(C)CC2)cc1C1C2[nH]c3ccccc3c2CC2C(=O)N(C)CC(=O)N21

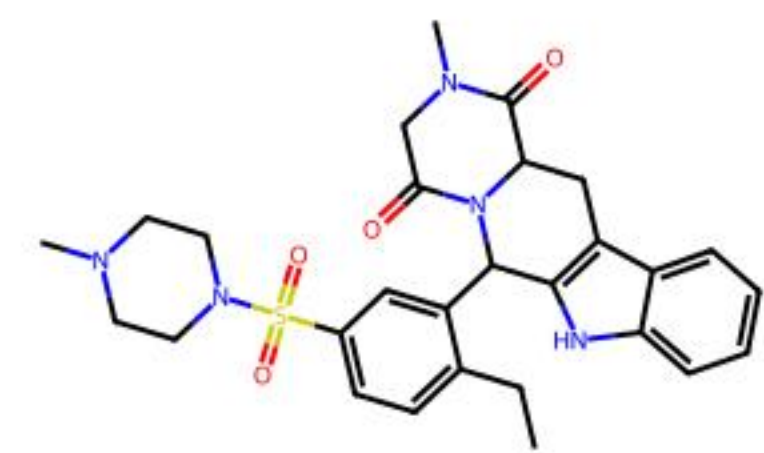

Reward: 0.39  
CCc1ccc(S(=O)(=O)N2CCN(C)CC2)cc1C1C2[nH]c3ccccc3c2CC2C(=O)N(C)CC(=O)N21
