# Supplementary material
Source: ML conference proceedings conference paper supplement (https://openreview.net/forum?id=Qdu92a5DiM)
Supplement: supplementary_material [file top_smiles_cuda:0.pdf › ICLR/plots/tdc/mestranol_similarity/top_smiles_cuda:0.pdf]

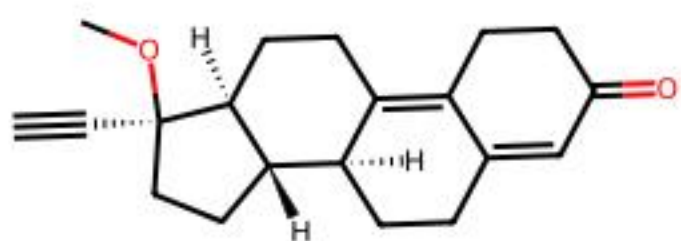

Target  
C#C[C@]1(CC[C@H]2[C@@H]3CCC4=CC(=O)CCC4=C3CC[C@H]12)OC

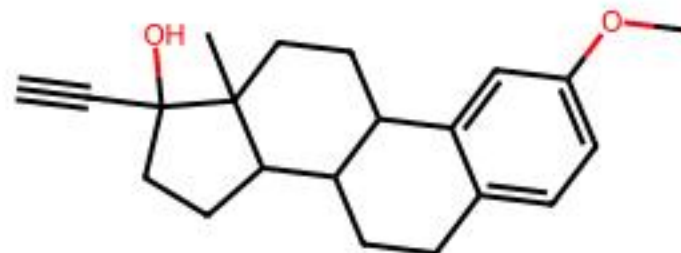

Reward: 1.00  
C#CC1(O)CCC2C3CCc4ccc(OC)cc4C3CCC21C

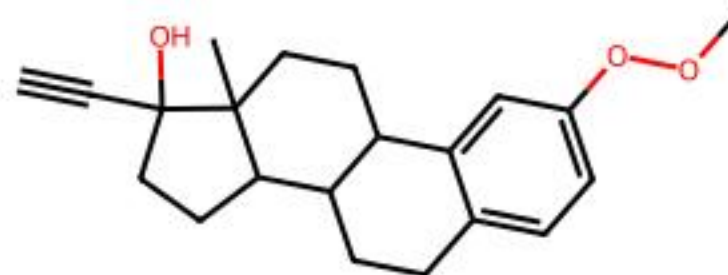

Reward: 1.00  
C#CC1(O)CCC2C3CCc4ccc(OOC)cc4C3CCC21C

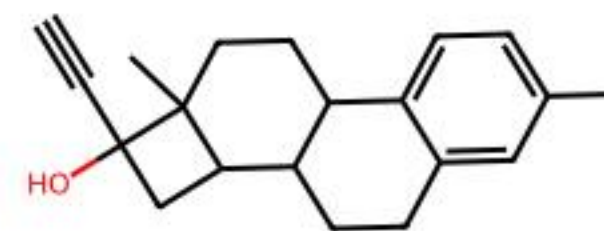

Reward: 1.00  
C#CC1(O)CC2C3CCc4cc(C)ccc4C3CCC21C

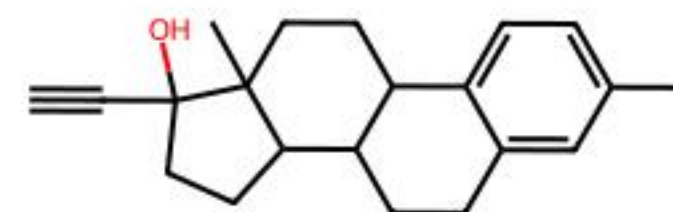

Reward: 1.00  
C#CC1(O)CCC2C3CCc4cc(C)ccc4C3CCC21C

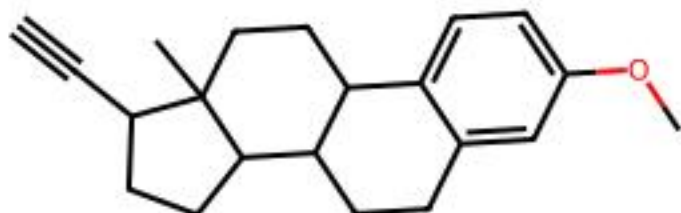

Reward: 1.00  
C#CC1CCC2C3CCc4cc(OC)ccc4C3CCC12C

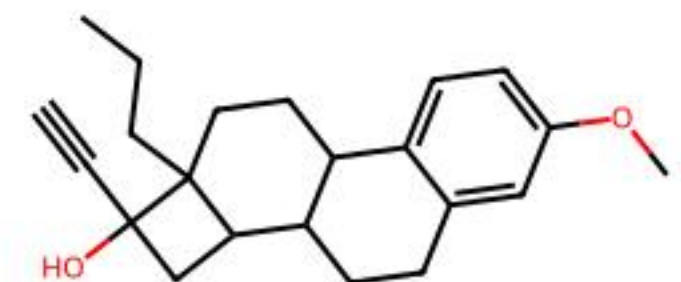

Reward: 1.00  
C#CC1(O)CC2C3CCc4cc(OC)ccc4C3CCC21CCC

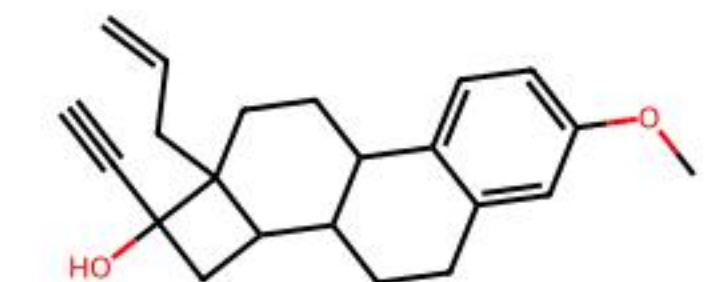

Reward: 1.00  
C#CC1(O)CC2C3CCc4cc(OC)ccc4C3CCC21CC=C

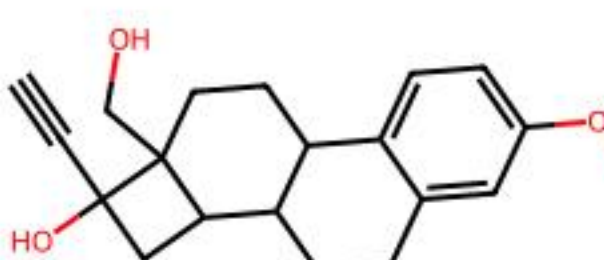

Reward: 1.00  
C#CC1(O)CC2C3CCc4cc(OC)ccc4C3CCC21CO

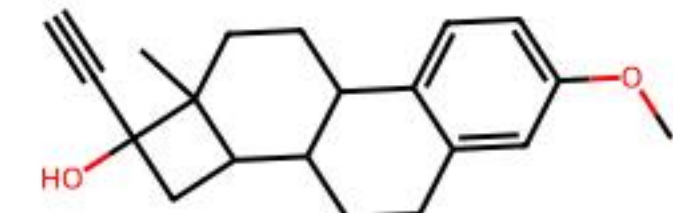

Reward: 1.00  
C#CC1(O)CC2C3CCc4cc(OC)ccc4C3CCC21C

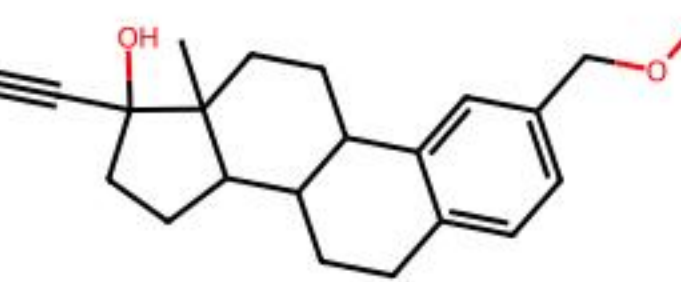

Reward: 0.99  
C#CC1(O)CCC2C3CCc4ccc(COC)cc4C3CCC21C
