# Supplementary material
Source: ML conference proceedings conference paper supplement (https://openreview.net/forum?id=Qdu92a5DiM)
Supplement: supplementary_material [file top_smiles_cuda:0.pdf › ICLR/plots/tdc/osimertinib_mpo/top_smiles_cuda:0.pdf]

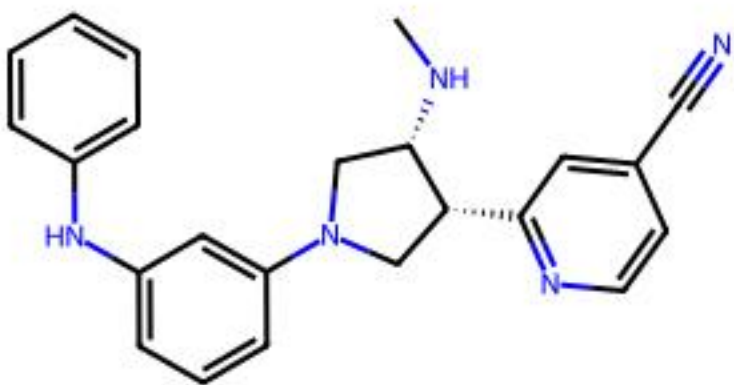

Target  
CN[C@H]1CN[C[C@H]1C2=NC=CC(=C2)C#N]C3=CC(=CC=C3)NC4=CC=CC=C4

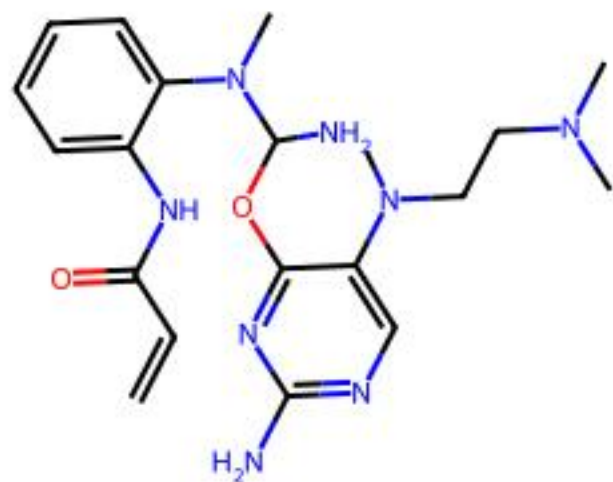

Reward: 0.91  
C=CC(=O)Nc1ccccc1N(C)C(N)Oc1nc(N)ncc1N(C)CCN(C)C

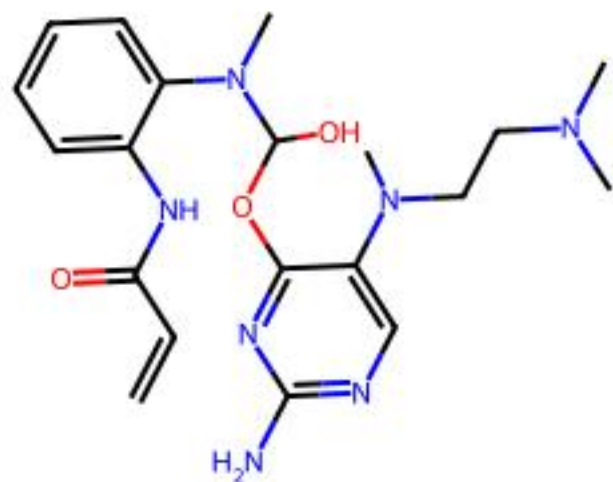

Reward: 0.91  
C=CC(=O)Nc1ccccc1N(C)C(O)Oc1nc(N)ncc1N(C)CCN(C)C

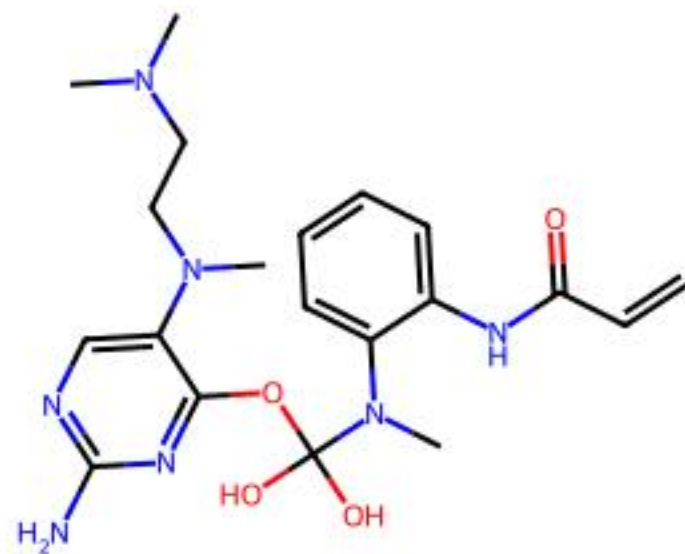

Reward: 0.90  
C=CC(=O)Nc1ccccc1N(C)C(O)(O)Oc1nc(N)ncc1N(C)CCN(C)C

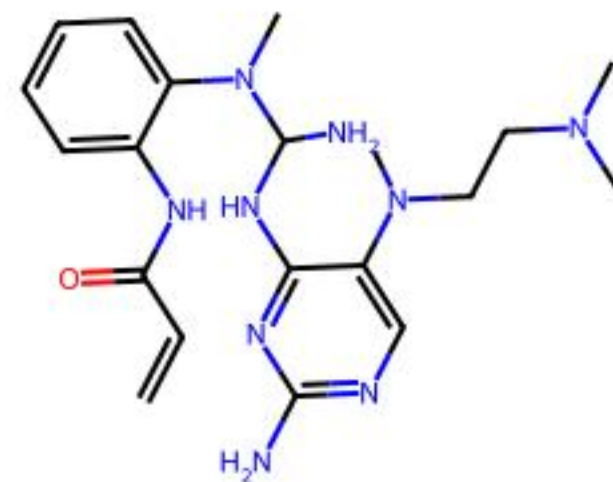

Reward: 0.90  
C=CC(=O)Nc1ccccc1N(C)C(N)Nc1nc(N)ncc1N(C)CCN(C)C

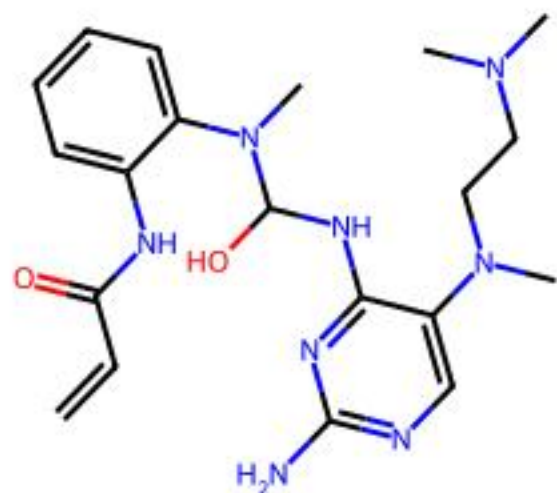

Reward: 0.90  
C=CC(=O)Nc1ccccc1N(C)C(O)Nc1nc(N)ncc1N(C)CCN(C)C

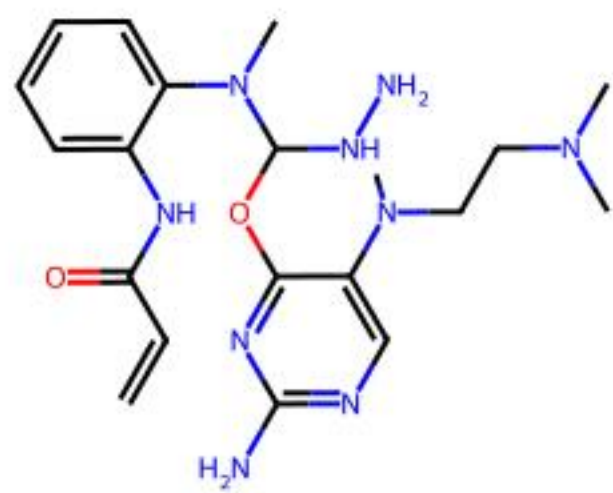

Reward: 0.90  
C=CC(=O)Nc1ccccc1N(C)C(NN)Oc1nc(N)ncc1N(C)CCN(C)C

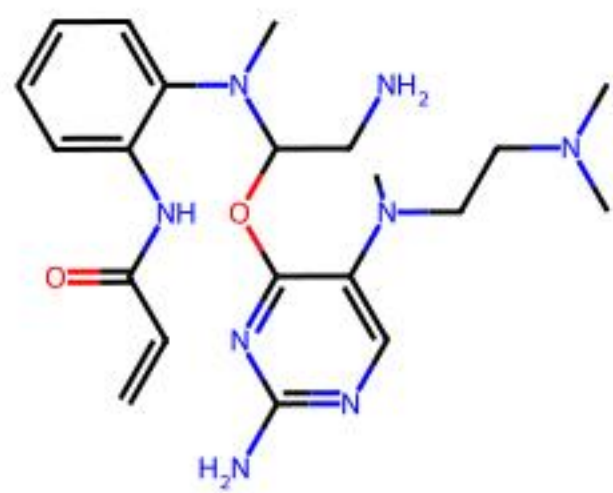

Reward: 0.90  
C=CC(=O)Nc1ccccc1N(C)C(CN)Oc1nc(N)ncc1N(C)CCN(C)C

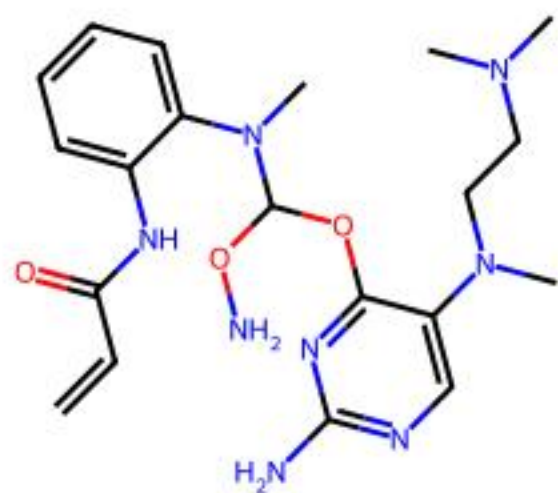

Reward: 0.90  
C=CC(=O)Nc1ccccc1N(C)C(ON)Oc1nc(N)ncc1N(C)CCN(C)C

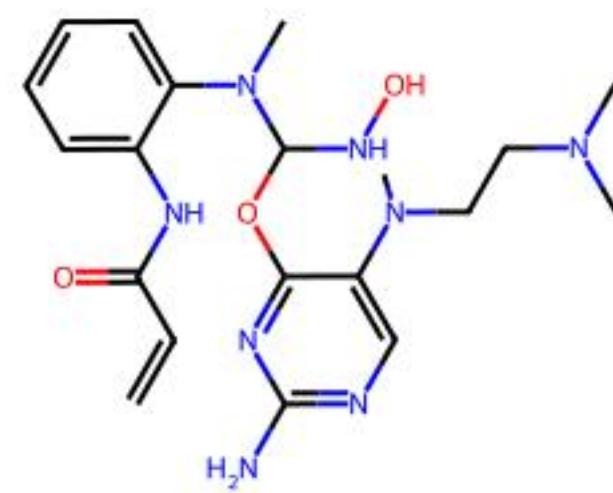

Reward: 0.90  
C=CC(=O)Nc1ccccc1N(C)C(NO)Oc1nc(N)ncc1N(C)CCN(C)C

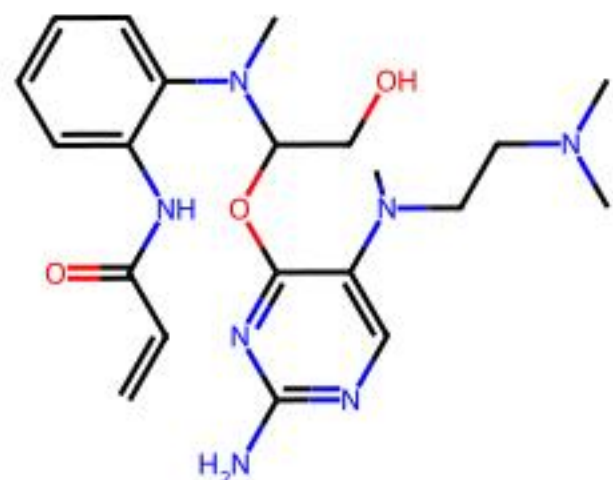

Reward: 0.90  
C=CC(=O)Nc1ccccc1N(C)C(CO)Oc1nc(N)ncc1N(C)CCN(C)C
