# Supplementary material
Source: ML conference proceedings conference paper supplement (https://openreview.net/forum?id=Qdu92a5DiM)
Supplement: supplementary_material [file top_smiles_cuda:0.pdf › ICLR/plots/tdc/perindopril_mpo/top_smiles_cuda:0.pdf]

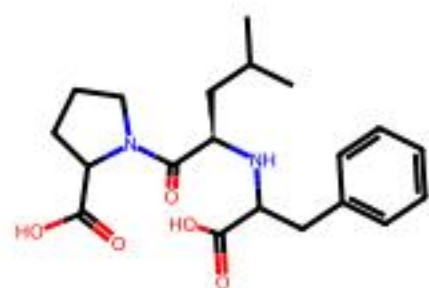

Target  
CC(C)C[C@H](C(=O)N1CCCC1C(=O)O)NC(CC2=CC=CC=C2)C(=O)O

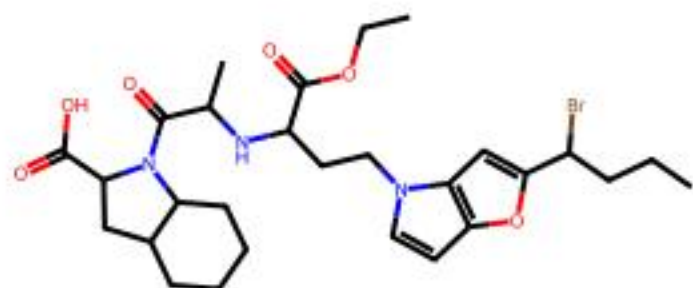

Reward: 0.81  
CCCC(Br)c1cc2c(ccn2CCC(NC(C)C(=O)N2C(C(=O)O)CC3CCCCC32)C(=O)OCC)o1

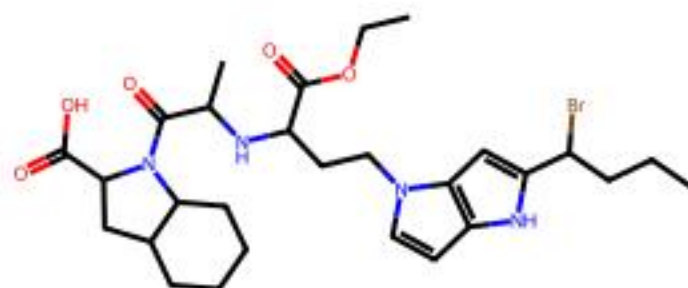

Reward: 0.81  
CCCC(Br)c1cc2c(ccn2CCC(NC(C)C(=O)N2C(C(=O)O)CC3CCCCC32)C(=O)OCC)[nH]1

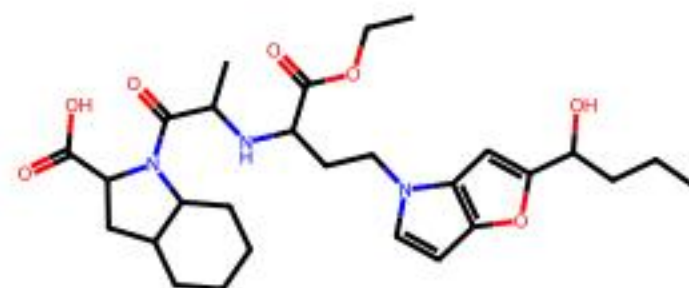

Reward: 0.81  
CCCC(O)c1cc2c(ccn2CCC(NC(C)C(=O)N2C(C(=O)O)CC3CCCCC32)C(=O)OCC)o1

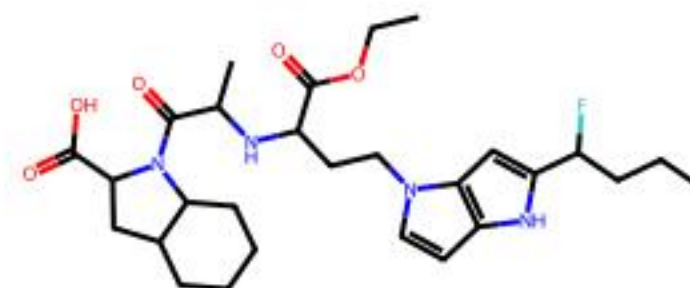

Reward: 0.81  
CCCC(F)c1cc2c(ccn2CCC(NC(C)C(=O)N2C(C(=O)O)CC3CCCCC32)C(=O)OCC)[nH]1

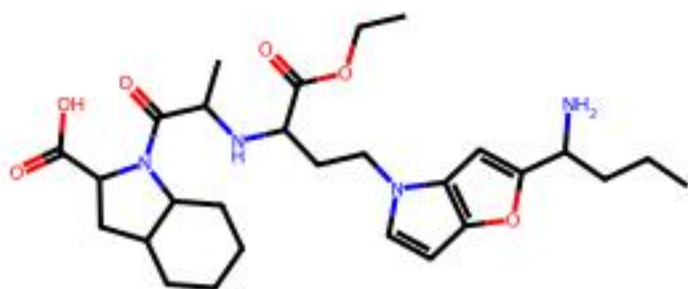

Reward: 0.81  
CCCC(N)c1cc2c(ccn2CCC(NC(C)C(=O)N2C(C(=O)O)CC3CCCCC32)C(=O)OCC)o1

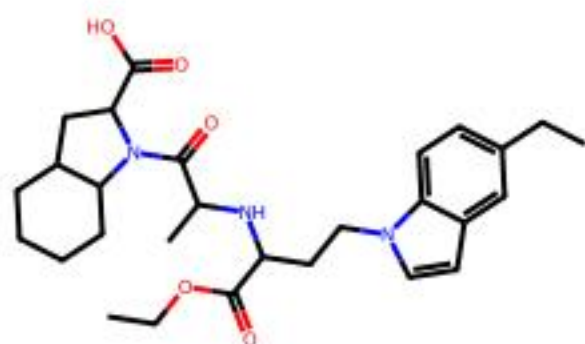

Reward: 0.81  
CCOC(=O)C(Cc1ccc2cc(CC)ccc21)NC(C)C(=O)N1C(C(=O)O)CC2CCCCC21

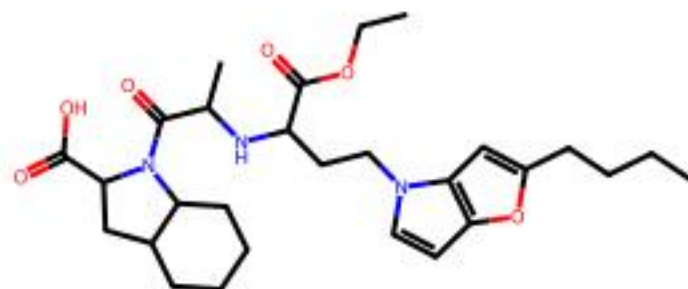

Reward: 0.81  
CCCCc1cc2c(ccn2CCC(NC(C)C(=O)N2C(C(=O)O)CC3CCCCC32)C(=O)OCC)o1

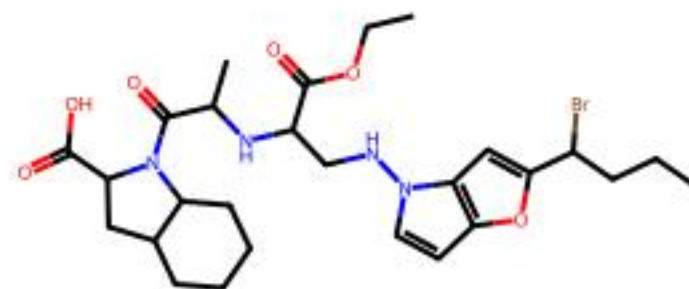

Reward: 0.80  
CCCC(Br)c1cc2c(ccn2NCC(NC(C)C(=O)N2C(C(=O)O)CC3CCCCC32)C(=O)OCC)o1

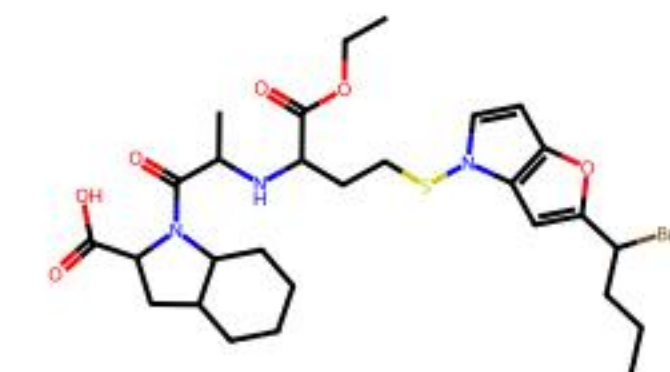

Reward: 0.80  
CCCC(Br)c1cc2c(ccn25CCC(NC(C)C(=O)N2C(C(=O)O)CC3CCCCC32)C(=O)OCC)o1

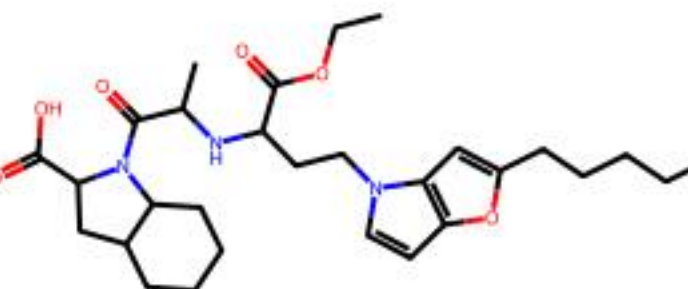

Reward: 0.80  
CCCCCc1cc2c(ccn2CCC(NC(C)C(=O)N2C(C(=O)O)CC3CCCCC32)C(=O)OCC)o1
