# Supplementary material
Source: ML conference proceedings conference paper supplement (https://openreview.net/forum?id=Qdu92a5DiM)
Supplement: supplementary_material [file top_smiles_cuda:0.pdf › ICLR/plots/tdc/qed/top_smiles_cuda:0.pdf]

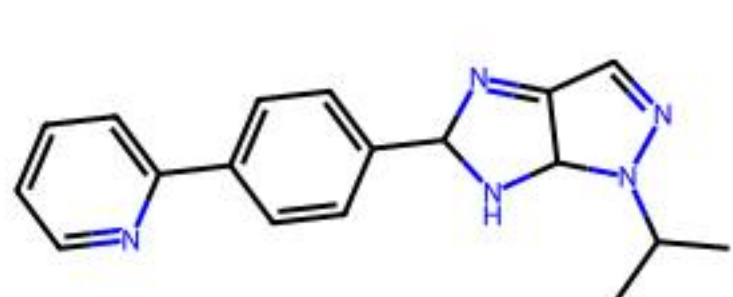

Reward: 0.95  
CC(C)N1N=CC2=NC(c3ccc(-c4ccccc4)cc3)NC21

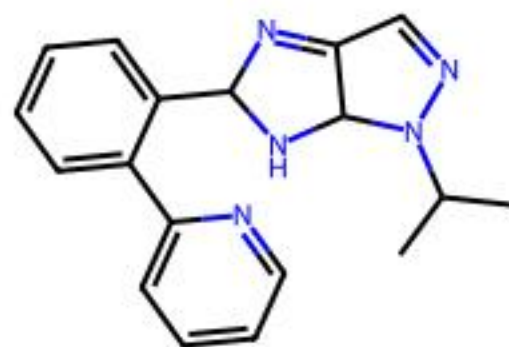

Reward: 0.95  
CC(C)N1N=CC2=NC(c3ccccc3-c3ccccc3)NC21

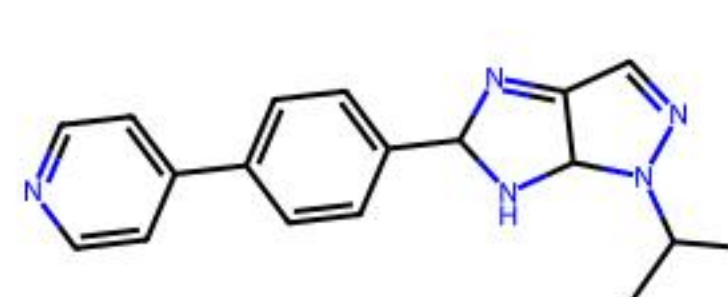

Reward: 0.95  
CC(C)N1N=CC2=NC(c3ccc(-c4ccncc4)cc3)NC21

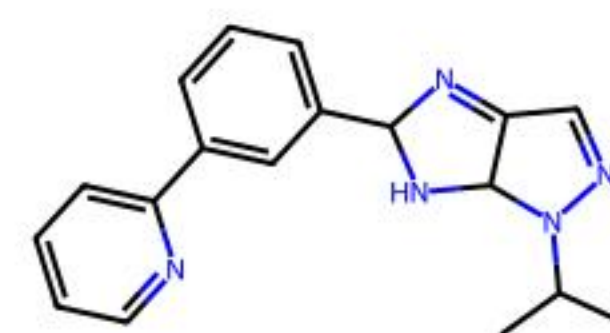

Reward: 0.95  
CC(C)N1N=CC2=NC(c3ccccc(-c4ccccc4)c3)NC21

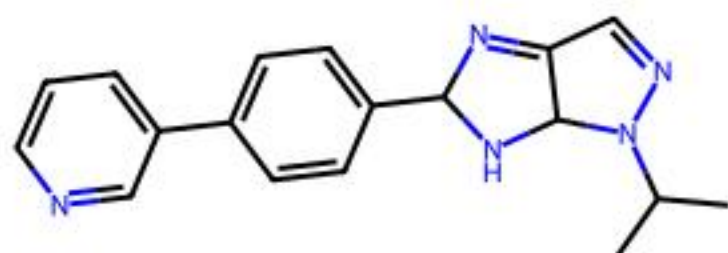

Reward: 0.95  
CC(C)N1N=CC2=NC(c3ccc(-c4ccccc4)cc3)NC21

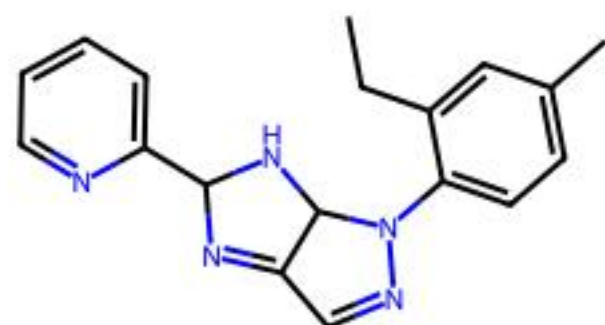

Reward: 0.95  
CCc1cc(C)ccc1N1N=CC2=NC(c3ccccc3)NC21

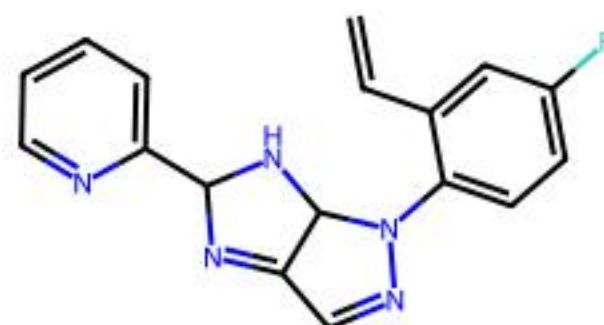

Reward: 0.95  
C=Cc1cc(F)ccc1N1N=CC2=NC(c3ccccc3)NC21

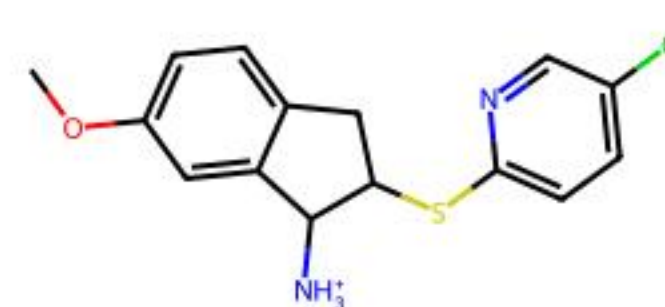

Reward: 0.95  
COc1ccc2c(c1)C([NH3+])C(Sc1ccc(Cl)cn1)C2

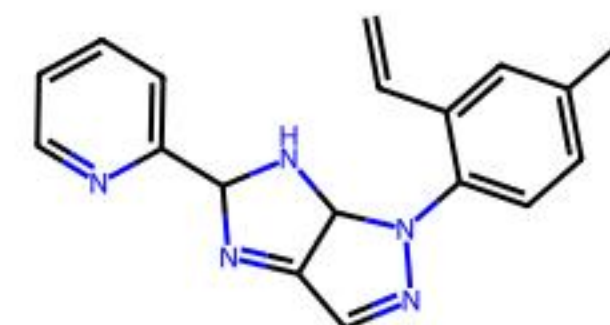

Reward: 0.95  
C=Cc1cc(C)ccc1N1N=CC2=NC(c3ccccc3)NC21

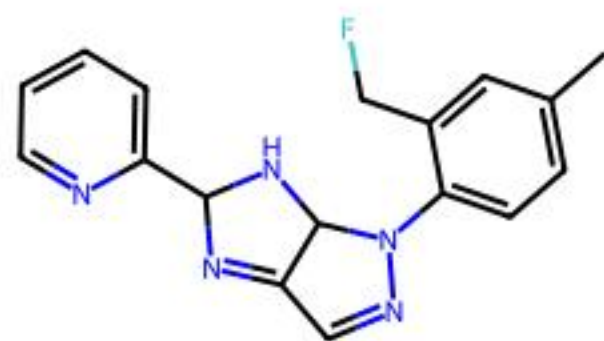

Reward: 0.95  
Cc1ccc(N2N=CC3=NC(c4ccccc4)NC32)c(CF)c1
