# Supplementary material
Source: ML conference proceedings conference paper supplement (https://openreview.net/forum?id=Qdu92a5DiM)
Supplement: supplementary_material [file top_smiles_cuda:0.pdf › ICLR/plots/tdc/ranolazine_mpo/top_smiles_cuda:0.pdf]

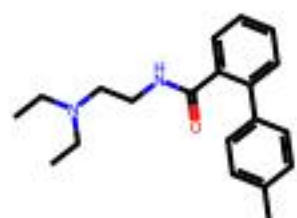

Target  
CC1=CC=C(C=C1)C2=CC=CC=C2C(=O)NCCN(CC)CC

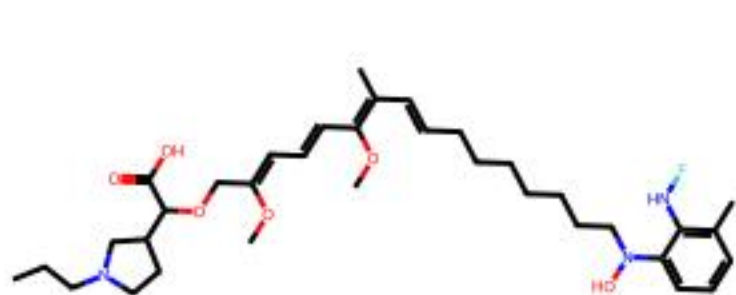

Reward: 0.89  
CCCN1CCC(C)(OCC(=CC=CC(OC)=C(C)C=CCCCCCCNC(=O)c2cccd(C)c2NF)OC)C(=O)O)C1

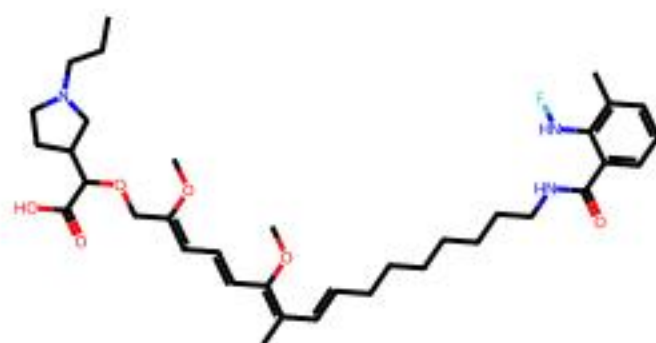

Reward: 0.89  
CCCN1CCC(C)(OCC(=CC=CC(OC)=C(C)C=CCCCCCCNC(=O)c2cccd(C)c2NF)OC)C(=O)O)C1

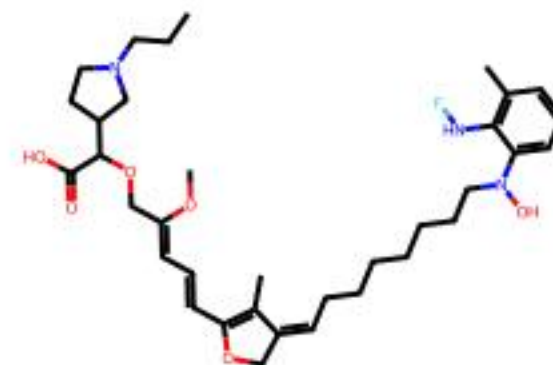

Reward: 0.89  
CCCN1CCC(C)(OCC(=CC=CC(OC)=C(C)C=CCCCCCCNC(=O)c3cccd(C)c3NF)OC)C(=O)O)C1

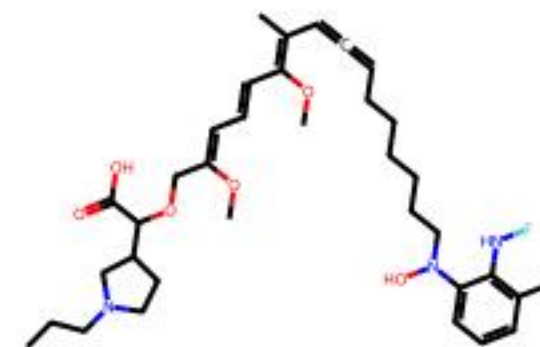

Reward: 0.89  
CCCN1CCC(C)(OCC(=CC=CC(OC)=C(C)C=CCCCCCCNC(=O)c2cccd(C)c2NF)OC)C(=O)O)C1

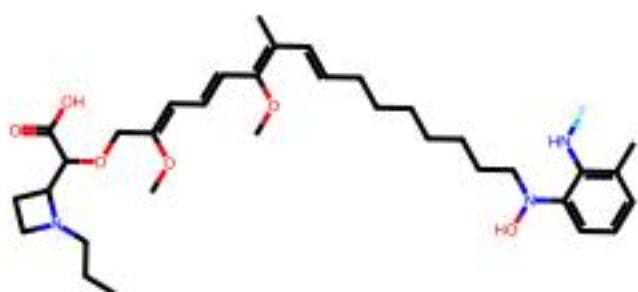

Reward: 0.89  
CCCN1CCC(C)(OCC(=CC=CC(OC)=C(C)C=CCCCCCCNC(=O)c1cccd(C)c1NF)OC)C(=O)O)C1

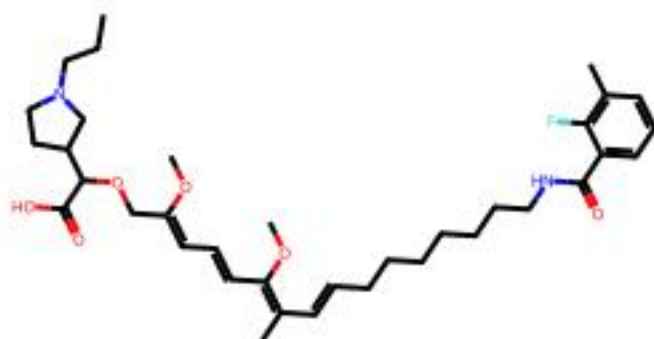

Reward: 0.89  
CCCN1CCC(C)(OCC(=CC=CC(OC)=C(C)C=CCCCCCCNC(=O)c2cccd(C)c2F)OC)C(=O)O)C1

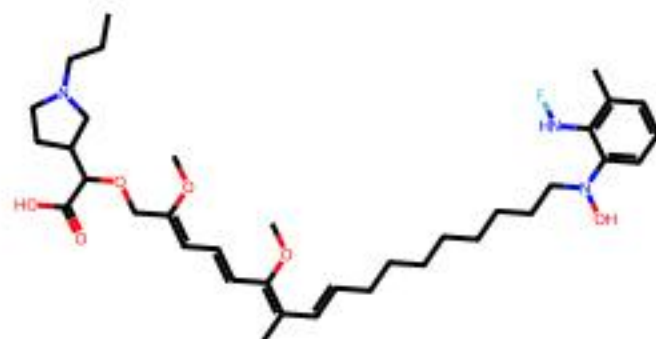

Reward: 0.89  
CCCN1CCC(C)(OCC(=CC=CC(OC)=C(C)C=CCCCCCCNC(=O)c2cccd(C)c2NF)OC)C(=O)O)C1

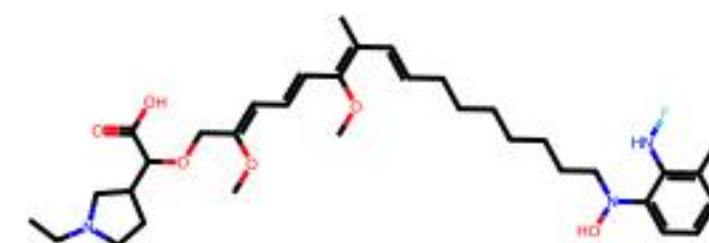

Reward: 0.89  
CCCN1CCC(C)(OCC(=CC=CC(OC)=C(C)C=CCCCCCCNC(=O)c2cccd(C)c2NF)OC)C(=O)O)C1

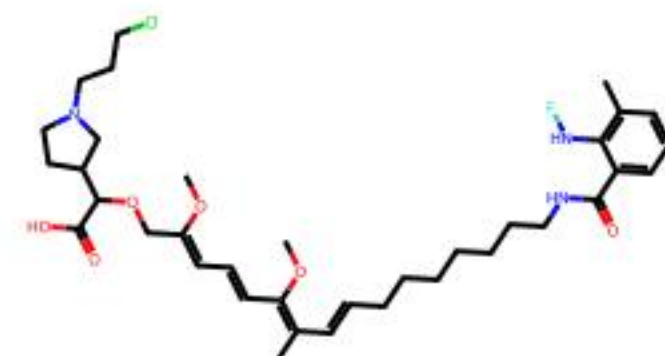

Reward: 0.89  
COC(=CC=CC(OC)=C(C)C=CCCCCCCNC(=O)c1cccd(C)c1NF)OC)C(=O)O)C1CCN(CCCC)C1

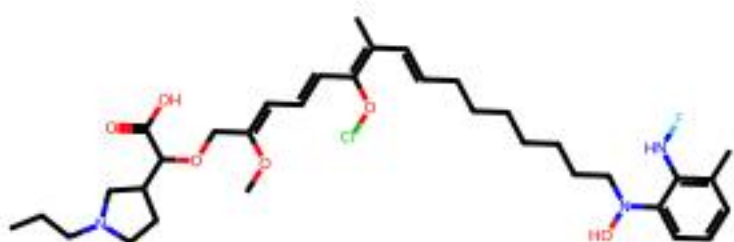

Reward: 0.89  
CCCN1CCC(C)(OCC(=CC=CC(OC)=C(C)C=CCCCCCCNC(=O)c2cccd(C)c2NF)OC)C(=O)O)C1
