# Supplementary material
Source: ML conference proceedings conference paper supplement (https://openreview.net/forum?id=Qdu92a5DiM)
Supplement: supplementary_material [file top_smiles_cuda:0.pdf › ICLR/plots/tdc/scaffold_hop/top_smiles_cuda:0.pdf]

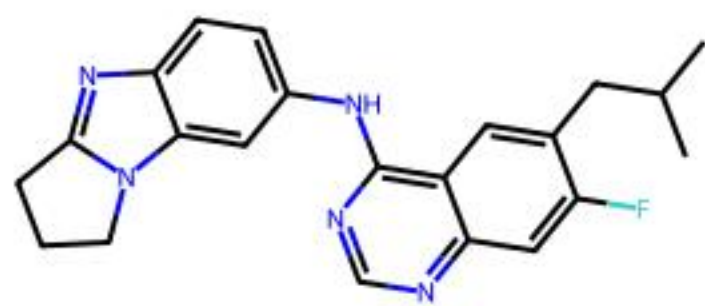

Reward: 0.67  
CC(C)Cc1cc2c(Nc3ccc4nc5n(c4c3)CCC5)ncnc2cc1F

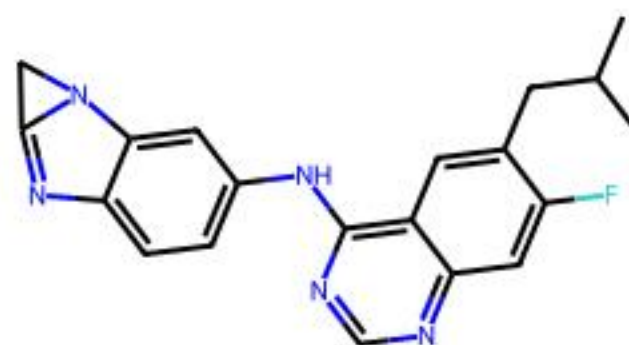

Reward: 0.67  
CC(C)Cc1cc2c(Nc3ccc4nc5n(c4c3)C5)ncnc2cc1F

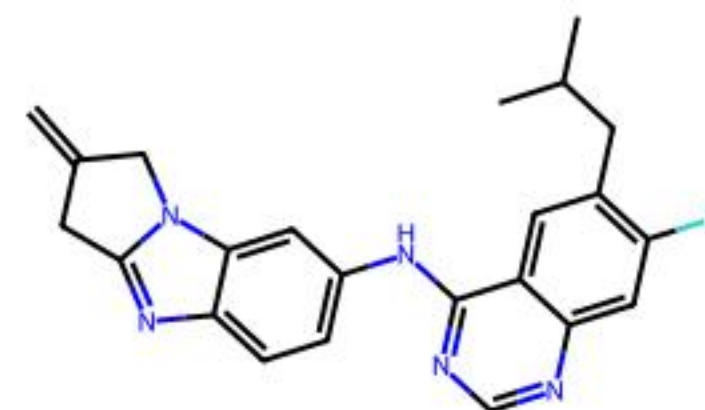

Reward: 0.67  
C=C1Cc2nc3ccc(Nc4ncnc5cc(F)c(CC(C)C)cc45)cc3n2C1

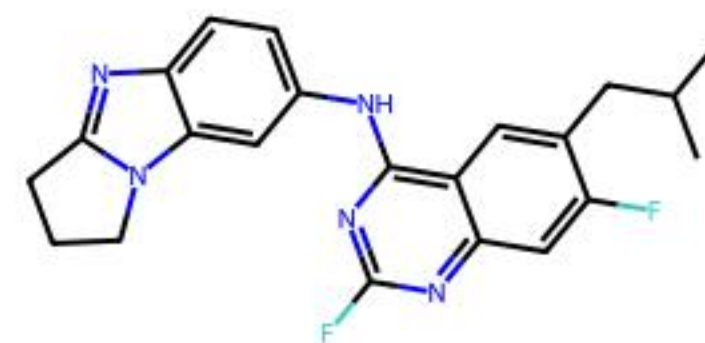

Reward: 0.67  
CC(C)Cc1cc2c(Nc3ccc4nc5n(c4c3)CCC5)nc(F)nc2cc1F

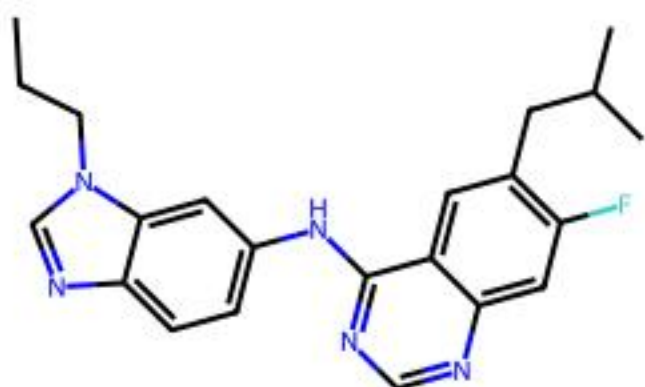

Reward: 0.67  
CCCN1cnc2ccc(Nc3ncnc4cc(F)c(CC(C)C)cc34)cc21

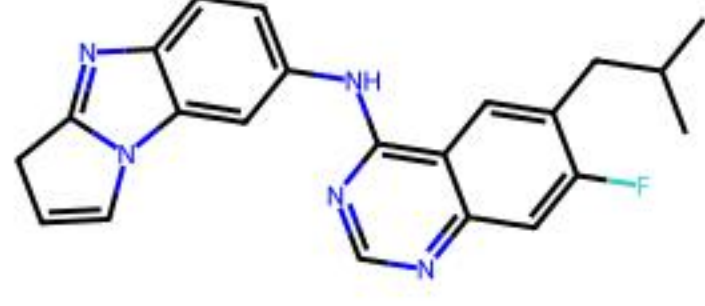

Reward: 0.67  
CC(C)Cc1cc2c(Nc3ccc4nc5n(c4c3)C=CC5)ncnc2cc1F

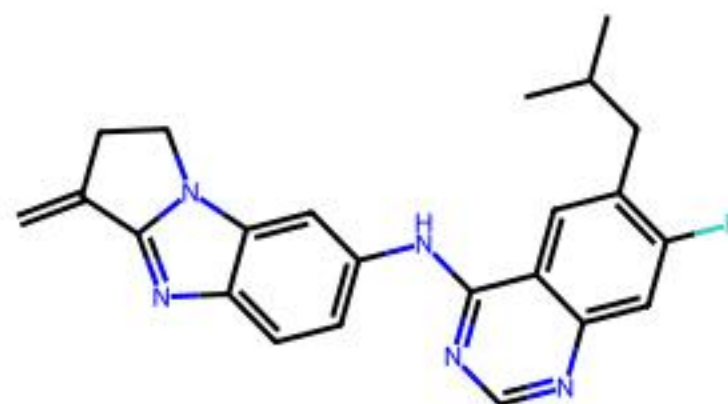

Reward: 0.67  
C=C1CCn2c1nc1ccc(Nc3ncnc4cc(F)c(CC(C)C)cc34)cc12

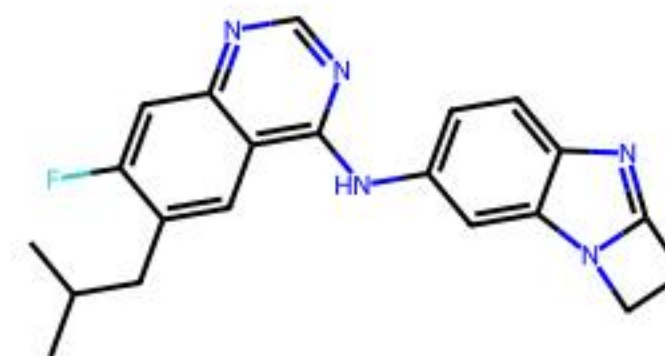

Reward: 0.67  
CC(C)Cc1cc2c(Nc3ccc4nc5n(c4c3)CC5)ncnc2cc1F

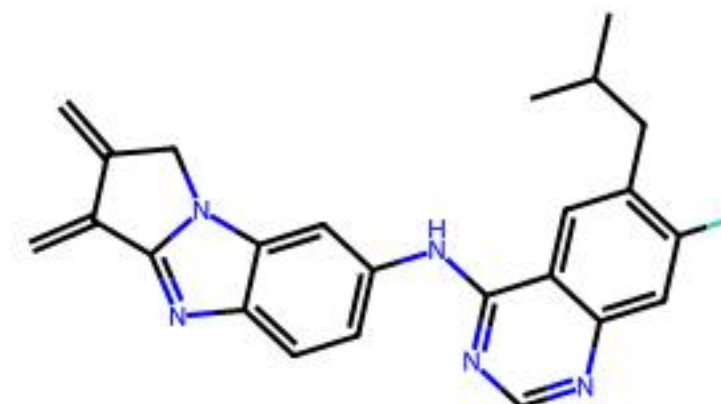

Reward: 0.67  
C=C1Cn2c(nc3ccc(Nc4ncnc5cc(F)c(CC(C)C)cc45)cc32)C1=C

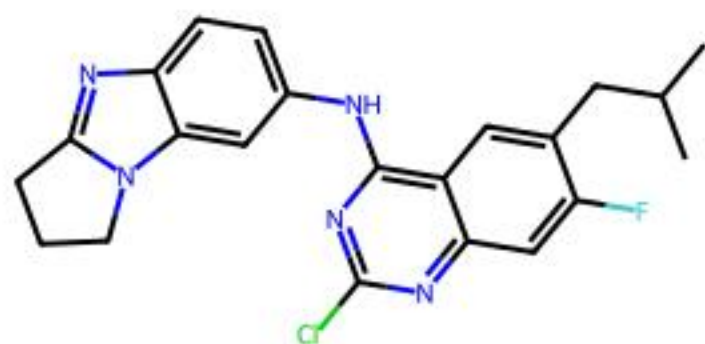

Reward: 0.67  
CC(C)Cc1cc2c(Nc3ccc4nc5n(c4c3)CCC5)nc(Cl)nc2cc1F
