# Supplementary material
Source: ML conference proceedings conference paper supplement (https://openreview.net/forum?id=Qdu92a5DiM)
Supplement: supplementary_material [file top_smiles_cuda:0.pdf › ICLR/plots/tdc/sitagliptin_mpo/top_smiles_cuda:0.pdf]

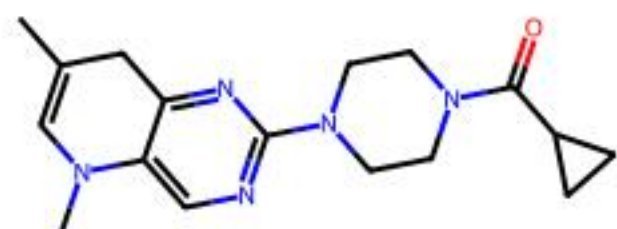

Target  
CC1=CN(C2=CN=C(N=C2C1)N3CCN(CC3)C(=O)C4CC4)C

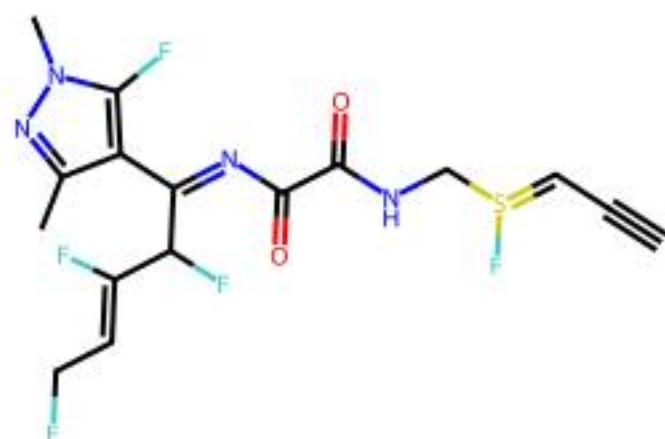

Reward: 0.76  
C#CC=S(F)CNC(=O)C(=O)N=C(c1c(C)nn(C)c1F)C(F)C(F)=CCF

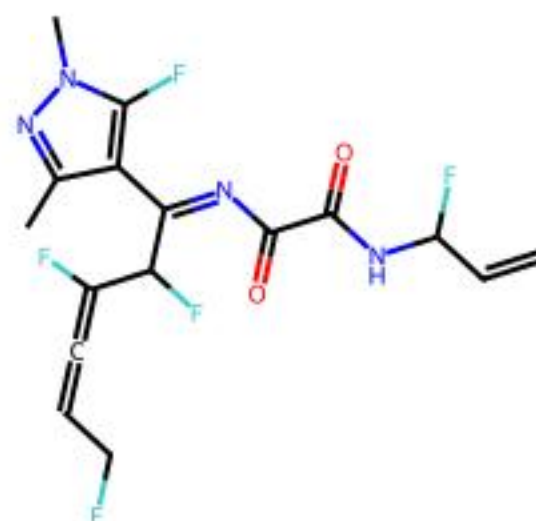

Reward: 0.76  
C=CC(F)NC(=O)C(=O)N=C(c1c(C)nn(C)c1F)C(F)C(F)=C=CCF

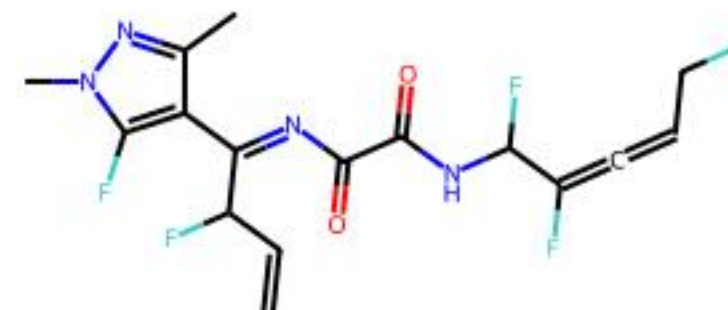

Reward: 0.76  
C=CC(F)C(=NC(=O)C(=O)NC(F)C(F)=C=CCF)c1c(C)nn(C)c1F

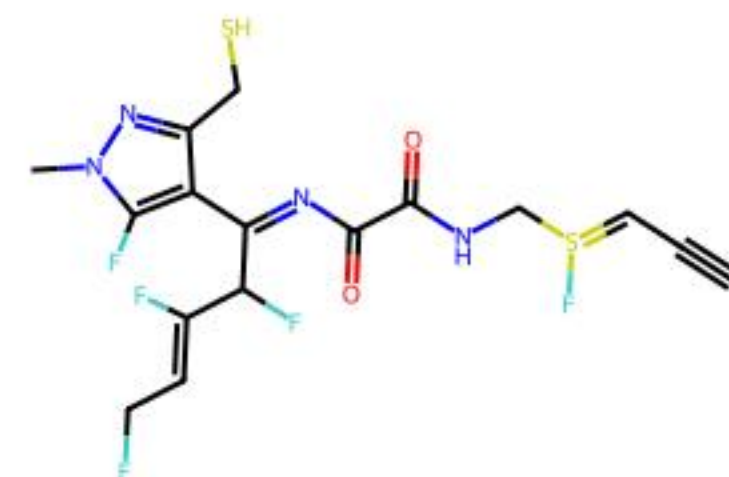

Reward: 0.74  
C#CC=S(F)CNC(=O)C(=O)N=C(c1c(CS)nn(C)c1F)C(F)C(F)=CCF

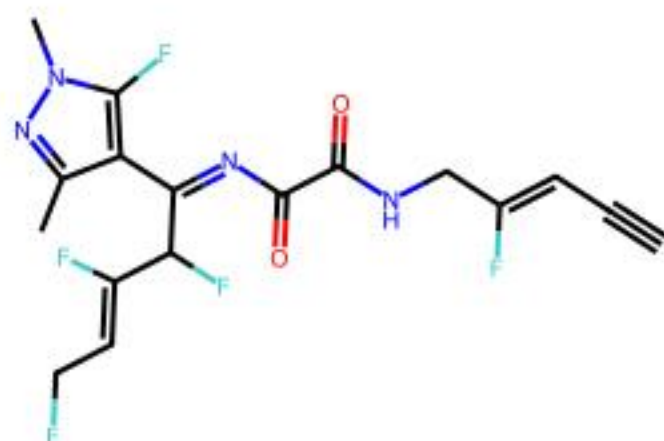

Reward: 0.74  
C#CC=C(F)CNC(=O)C(=O)N=C(c1c(C)nn(C)c1F)C(F)C(F)=CCF

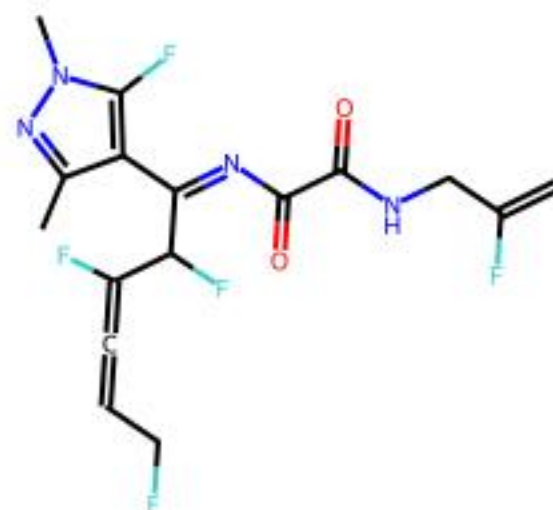

Reward: 0.74  
C=C(F)CNC(=O)C(=O)N=C(c1c(C)nn(C)c1F)C(F)C(F)=C=CCF

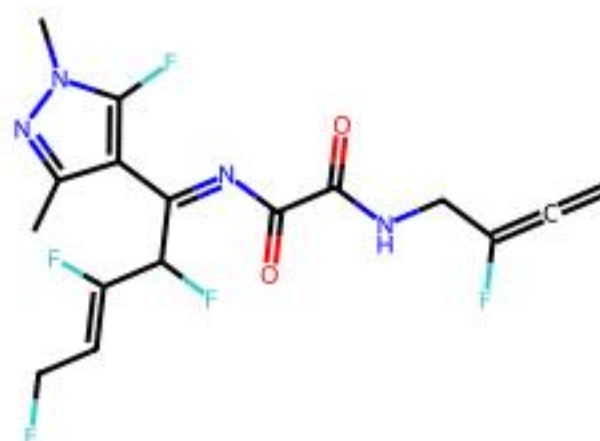

Reward: 0.74  
C=C=C(F)CNC(=O)C(=O)N=C(c1c(C)nn(C)c1F)C(F)C(F)=CCF

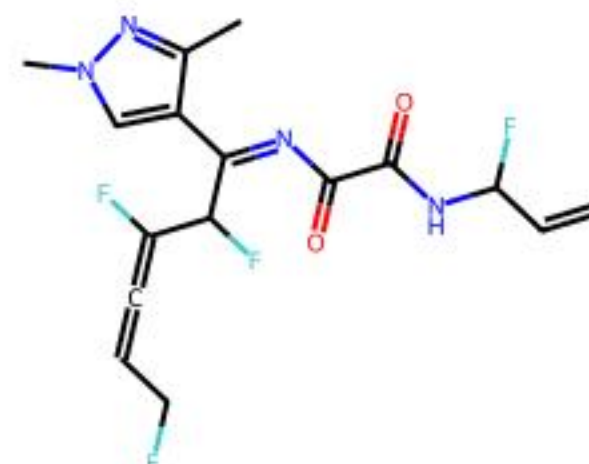

Reward: 0.74  
C=CC(F)NC(=O)C(=O)N=C(c1cn(C)nc1C)C(F)C(F)=C=CCF

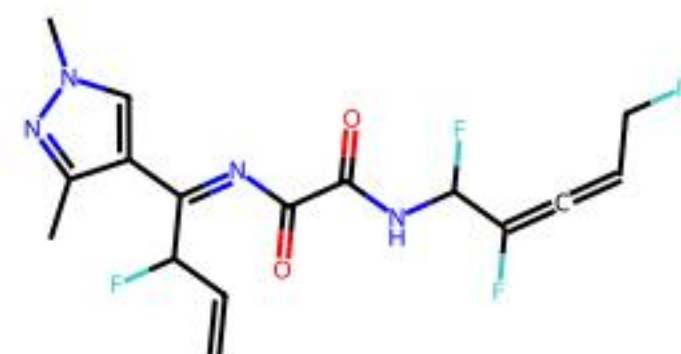

Reward: 0.74  
C=CC(F)C(=NC(=O)C(=O)NC(F)C(F)=C=CCF)c1cn(C)nc1C

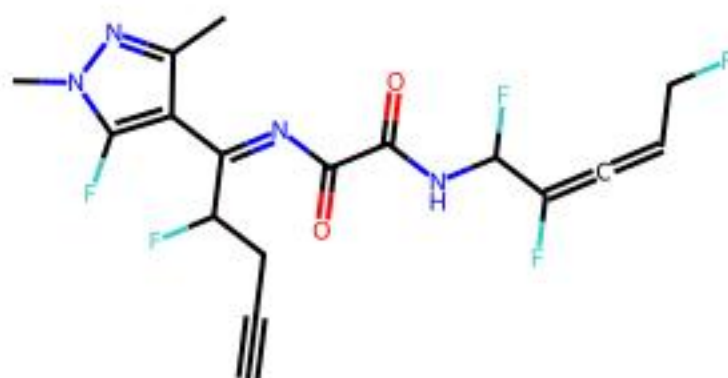

Reward: 0.73  
C#CCC(F)C(=NC(=O)C(=O)NC(F)C(F)=C=CCF)c1c(C)nn(C)c1F
