# Supplementary material
Source: ML conference proceedings conference paper supplement (https://openreview.net/forum?id=Qdu92a5DiM)
Supplement: supplementary_material [file top_smiles_cuda:0.pdf › ICLR/plots/tdc/thiothixene_rediscovery/top_smiles_cuda:0.pdf]

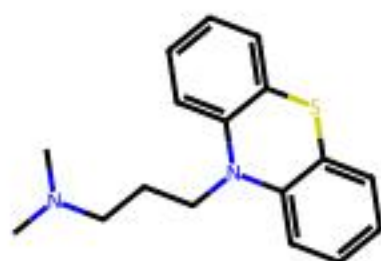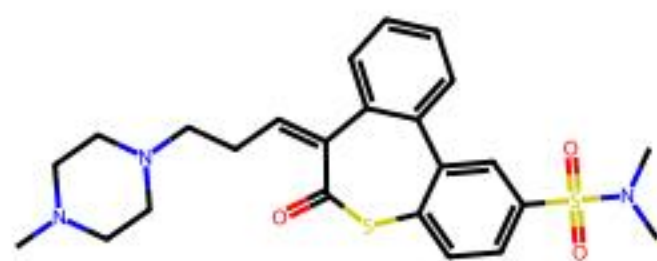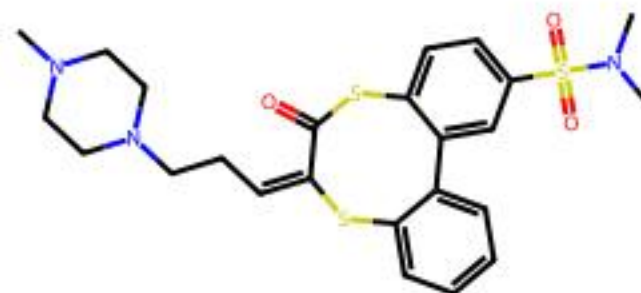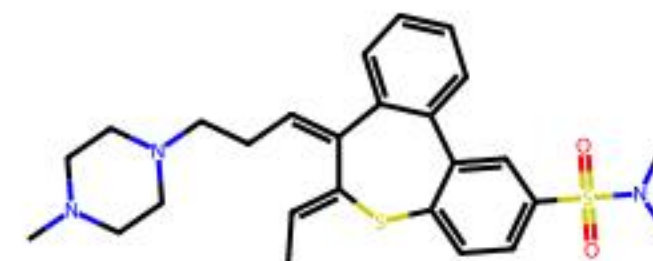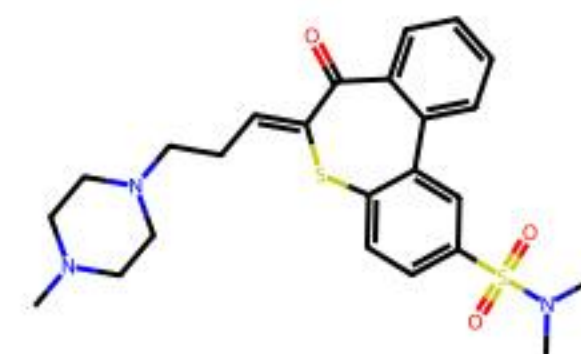

Target

CN(C)CCCN1C2=CC=CC=C2SC3=CC=CC=C13

Reward: 0.80  
CN1CCN(CCC=C2C(=O)Sc3ccc(S(=O)(=O)N(C)C)cc3-c3ccccc32)CC1

Reward: 0.80  
CN1CCN(CCC=C2Sc3ccccc3-c3cc(S(=O)(=O)N(C)C)ccc3SC2=O)CC1

Reward: 0.78  
CC=C1Sc2ccc(S(=O)(=O)N(C)C)cc2-c2ccccc2C1=CCCN1CCN(C)CC1

Reward: 0.77  
CN1CCN(CCC=C2Sc3ccc(S(=O)(=O)N(C)C)cc3-c3ccccc3C2=O)CC1

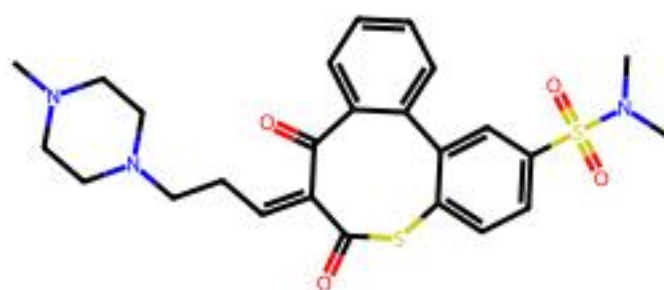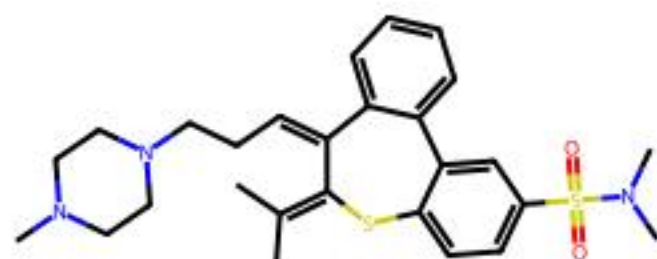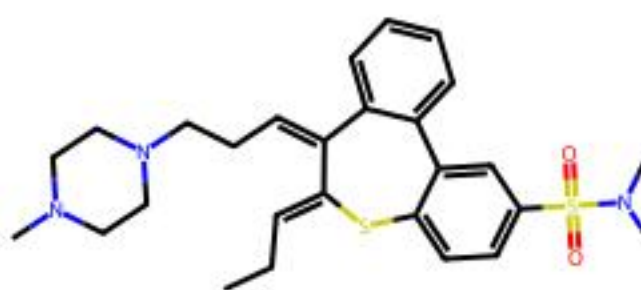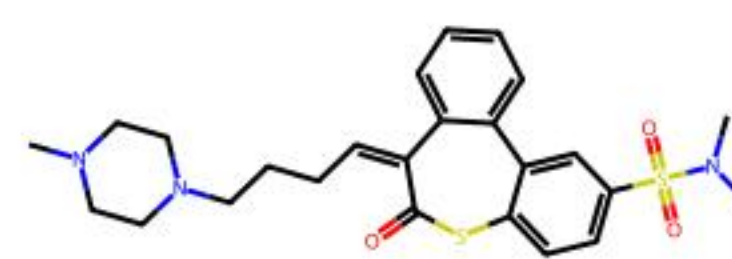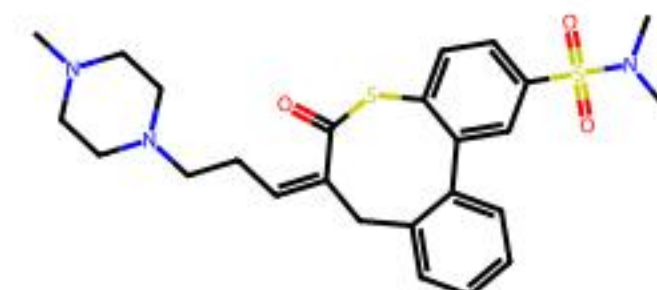

Reward: 0.76  
CN1CCN(CCC=C2C(=O)Sc3ccc(S(=O)(=O)N(C)C)cc3-c3ccccc3C2=O)CC1

Reward: 0.76  
CC(C)=C1Sc2ccc(S(=O)(=O)N(C)C)cc2-c2ccccc2C1=CCCN1CCN(C)CC1

Reward: 0.76  
CCC=C1Sc2ccc(S(=O)(=O)N(C)C)cc2-c2ccccc2C1=CCCN1CCN(C)CC1

Reward: 0.75  
CN1CCN(CCCC=C2C(=O)Sc3ccc(S(=O)(=O)N(C)C)cc3-c3ccccc32)CC1

Reward: 0.75  
CN1CCN(CCC=C2Cc3ccccc3-c3cc(S(=O)(=O)N(C)C)ccc3SC2=O)CC1

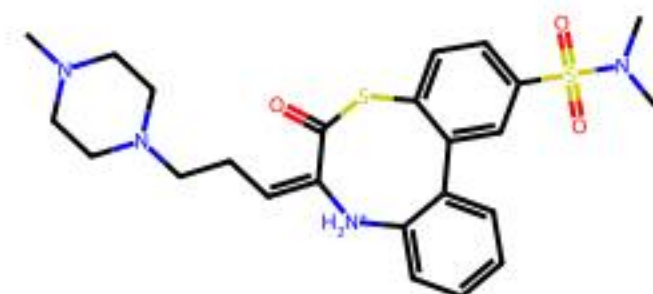

Reward: 0.75  
CN1CCN(CCC=C2[NH2+ ]c3ccccc3-c3cc(S(=O)(=O)N(C)C)ccc3SC2=O)CC1
