# Supplementary material
Source: ML conference proceedings conference paper supplement (https://openreview.net/forum?id=Qdu92a5DiM)
Supplement: supplementary_material [file top_smiles_cuda:0.pdf › ICLR/plots/tdc/troglitazone_rediscovery/top_smiles_cuda:0.pdf]

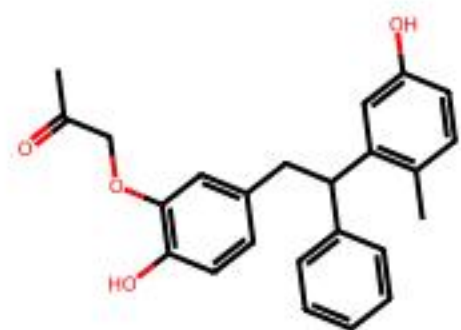

Target  
CC1=C(C=C(C=C1)O)C(CC2=CC(=C(C=C2)O)OCC(=O)C)C3=CC=CC=C3

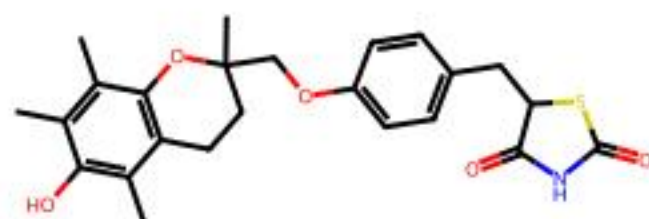

Reward: 1.00  
Cc1c(C)c2c(c(C)c1O)CCC(C)(COC1ccc(CC3SC(=O)NC3=O)cc1)O2

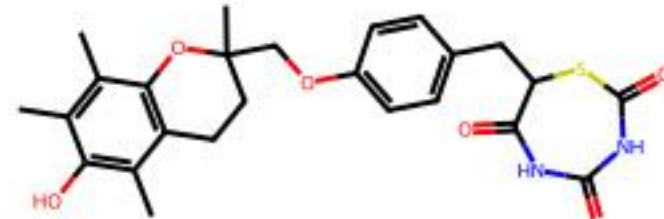

Reward: 0.89  
Cc1c(C)c2c(c(C)c1O)CCC(C)(COC1ccc(CC3SC(=O)NC(=O)NC3=O)cc1)O2

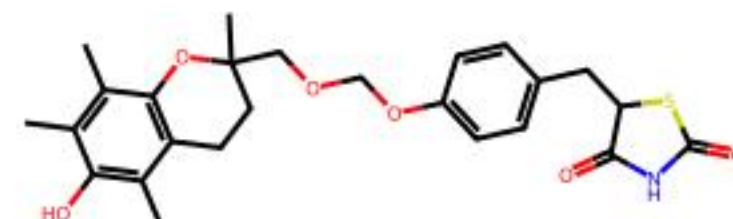

Reward: 0.89  
Cc1c(C)c2c(c(C)c1O)CCC(C)(COCOC1ccc(CC3SC(=O)NC3=O)cc1)O2

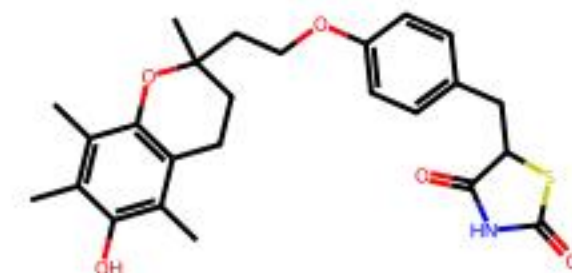

Reward: 0.88  
Cc1c(C)c2c(c(C)c1O)CCC(C)(CCOC1ccc(CC3SC(=O)NC3=O)cc1)O2

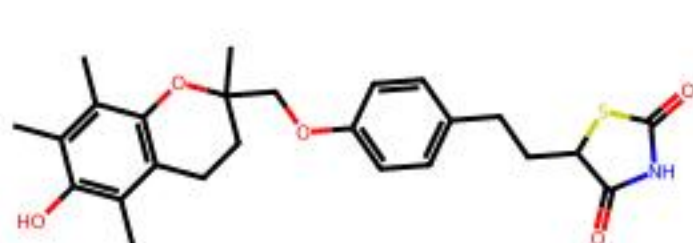

Reward: 0.88  
Cc1c(C)c2c(c(C)c1O)CCC(C)(COC1ccc(CC3SC(=O)NC3=O)cc1)O2

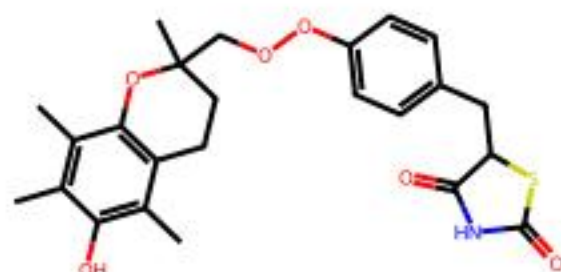

Reward: 0.88  
Cc1c(C)c2c(c(C)c1O)CCC(C)(COOC1ccc(CC3SC(=O)NC3=O)cc1)O2

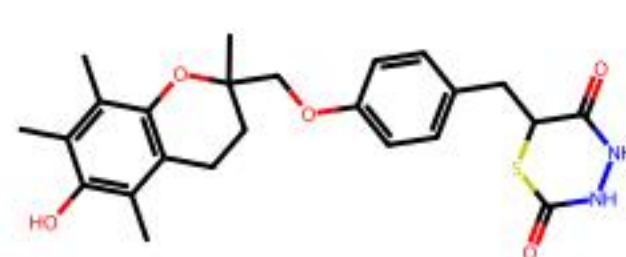

Reward: 0.88  
Cc1c(C)c2c(c(C)c1O)CCC(C)(COC1ccc(CC3SC(=O)NNC3=O)cc1)O2

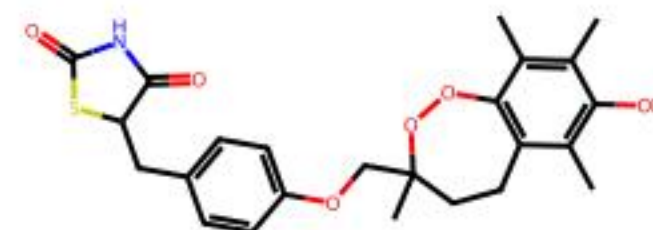

Reward: 0.88  
Cc1c(C)c2c(c(C)c1O)CCC(C)(COC1ccc(CC3SC(=O)NC3=O)cc1)O2

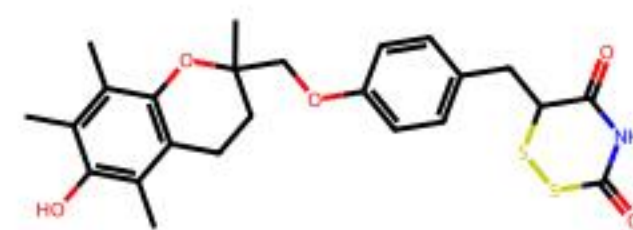

Reward: 0.88  
Cc1c(C)c2c(c(C)c1O)CCC(C)(COC1ccc(CC3SC(=O)NC3=O)cc1)O2

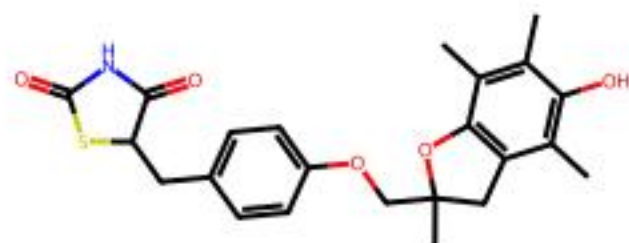

Reward: 0.88  
Cc1c(C)c2c(c(C)c1O)CCC(C)(COC1ccc(CC3SC(=O)NC3=O)cc1)O2
