# Supplementary material
Source: ML conference proceedings conference paper supplement (https://openreview.net/forum?id=Qdu92a5DiM)
Supplement: supplementary_material [file top_smiles_cuda:0.pdf › ICLR/plots/tdc/valsartan_smarts/top_smiles_cuda:0.pdf]

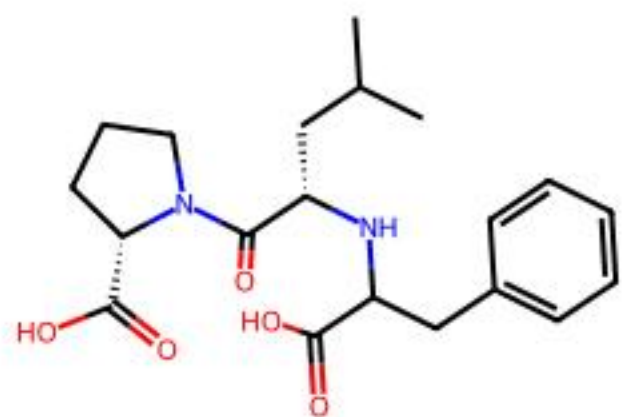

Target  
CC(C)[C@H](C(=O)N1CCC[C@H]1C(=O)O)NC(Cc2ccccc2)C(=O)O

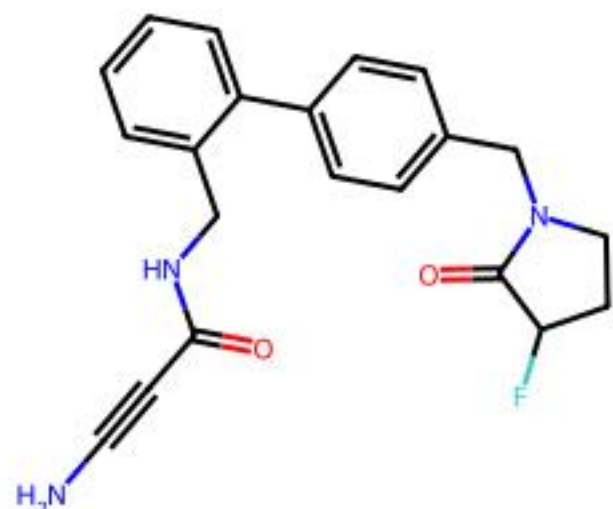

Reward: 0.98  
NC#CC(=O)NCc1ccccc1-c1ccc(CN2CCC(F)C2=O)cc1

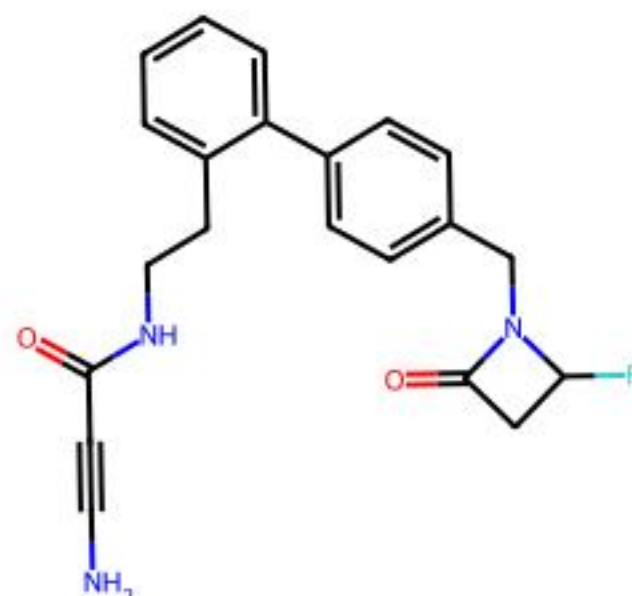

Reward: 0.98  
NC#CC(=O)NCCc1ccccc1-c1ccc(CN2C(=O)CC2F)cc1

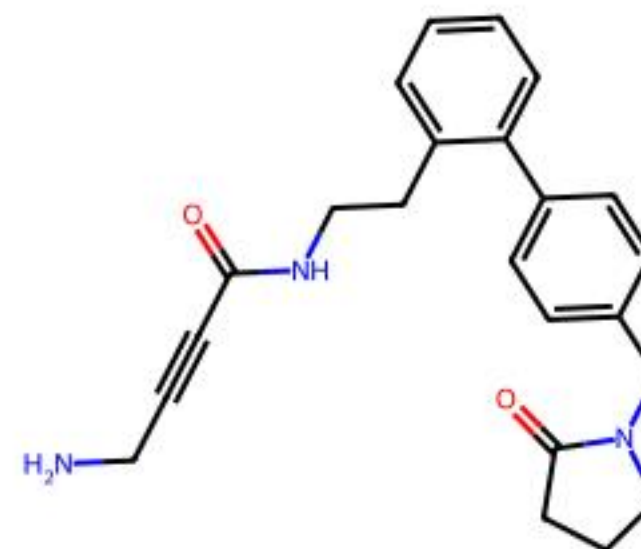

Reward: 0.97  
NCC#CC(=O)NCCc1ccccc1-c1ccc(CN2CCCC2=O)cc1

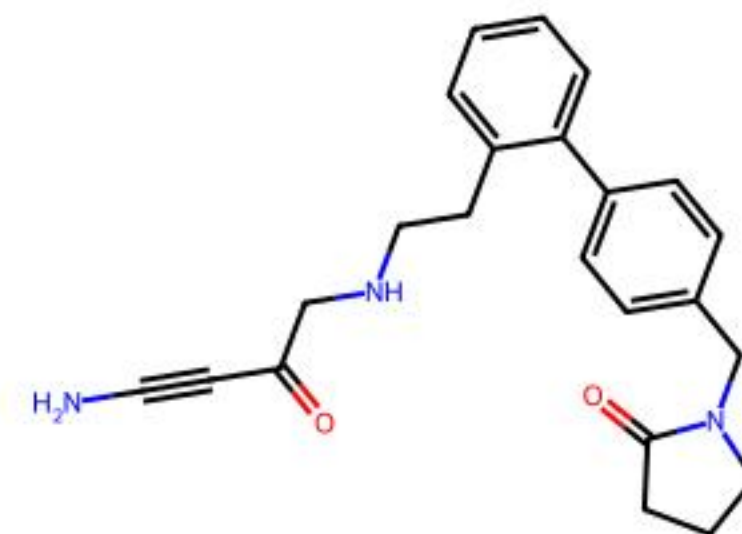

Reward: 0.97  
NC#CC(=O)CNCCc1ccccc1-c1ccc(CN2CCCC2=O)cc1

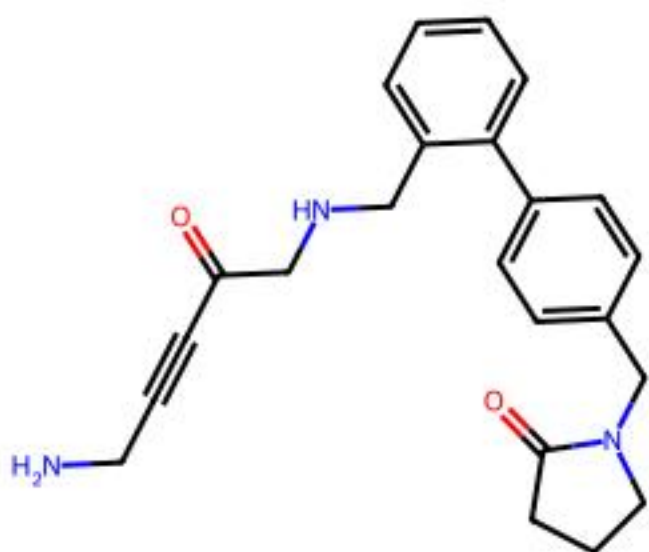

Reward: 0.97  
NCC#CC(=O)CNCc1ccccc1-c1ccc(CN2CCCC2=O)cc1

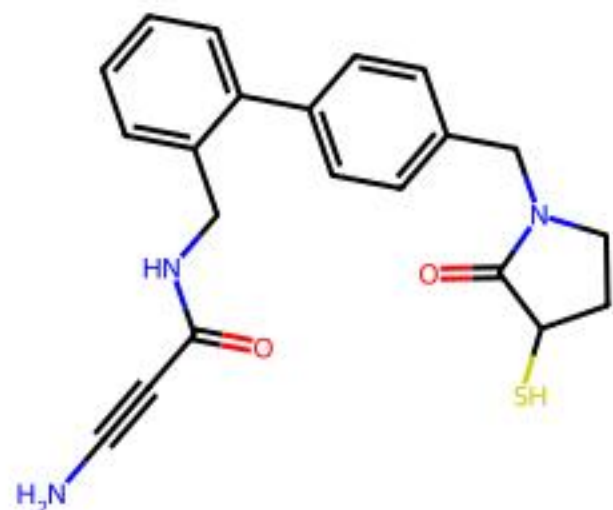

Reward: 0.96  
NC#CC(=O)NCc1ccccc1-c1ccc(CN2CCC(S)C2=O)cc1

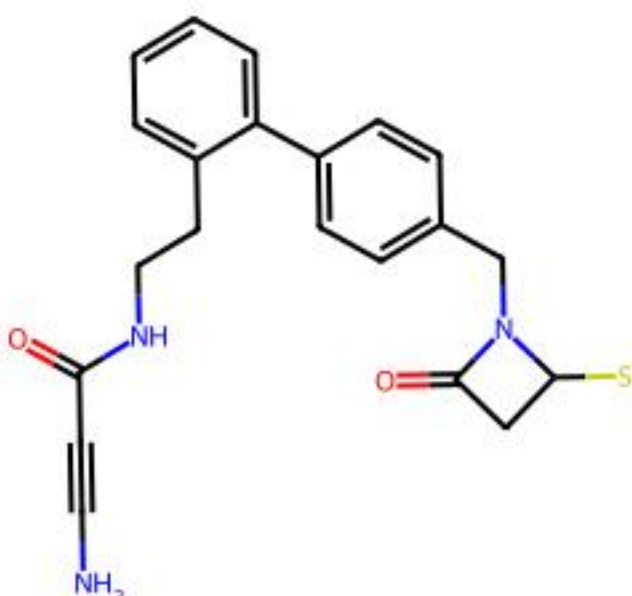

Reward: 0.96  
NC#CC(=O)NCCc1ccccc1-c1ccc(CN2C(=O)CC2S)cc1

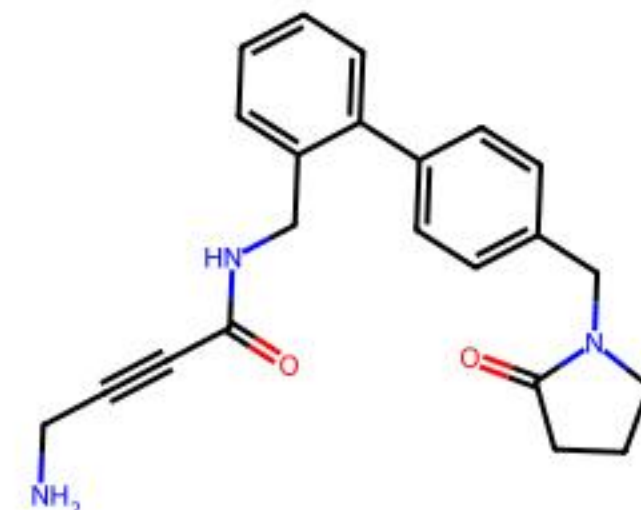

Reward: 0.94  
NCC#CC(=O)NCc1ccccc1-c1ccc(CN2CCCC2=O)cc1

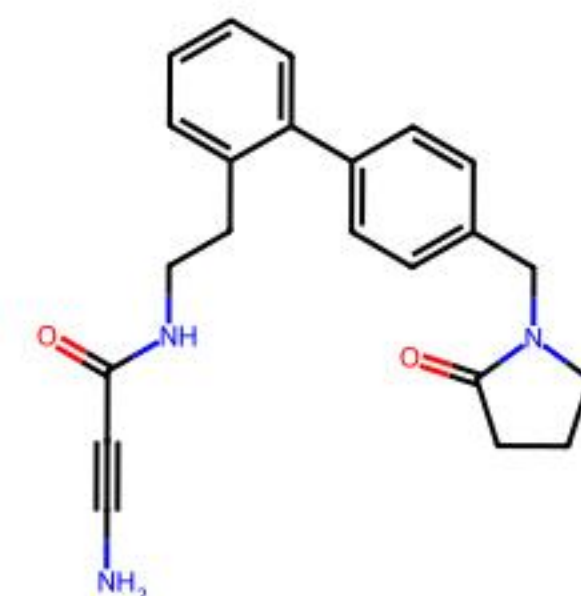

Reward: 0.94  
NC#CC(=O)NCCc1ccccc1-c1ccc(CN2CCCC2=O)cc1

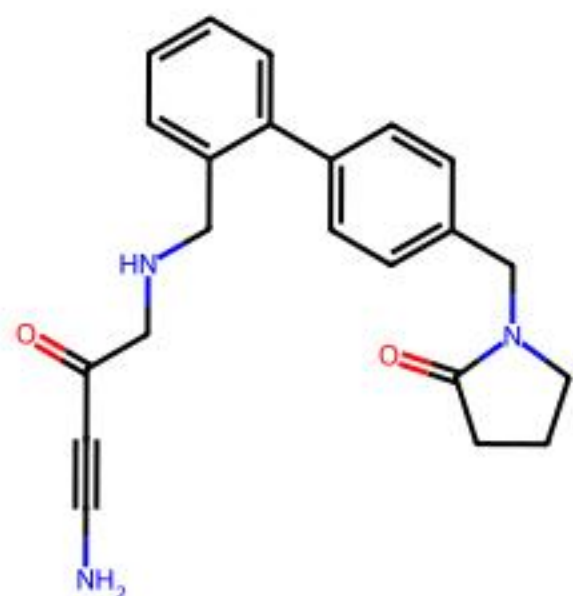

Reward: 0.94  
NC#CC(=O)CNCCc1ccccc1-c1ccc(CN2CCCC2=O)cc1
