# Supplementary material
Source: ML conference proceedings conference paper supplement (https://openreview.net/forum?id=Qdu92a5DiM)
Supplement: supplementary_material [file top_smiles_cuda:0.pdf › ICLR/plots/tdc/zaleplon_mpo/top_smiles_cuda:0.pdf]

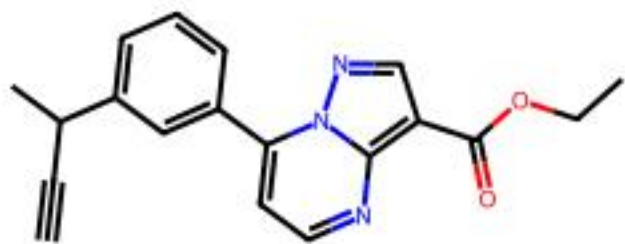

Reward: 0.72  
C#CC(C)c1cccc(-c2ccnc3c(C(=O)OCC)cnn23)c1

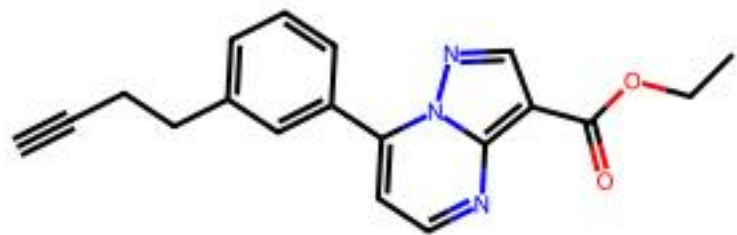

Reward: 0.70  
C#CCCc1cccc(-c2ccnc3c(C(=O)OCC)cnn23)c1

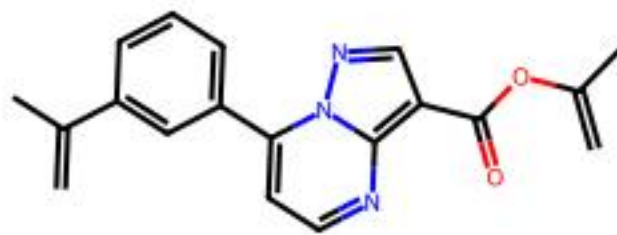

Reward: 0.70  
C=C(C)OC(=O)c1cnn2c(-c3cccc(C(=C)C)c3)ccnc12

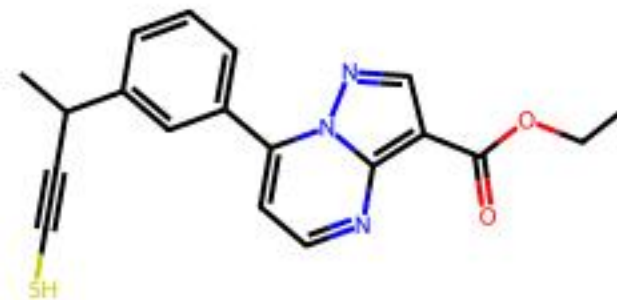

Reward: 0.69  
CCOC(=O)c1cnn2c(-c3cccc(C(C)C#CS)c3)ccnc12

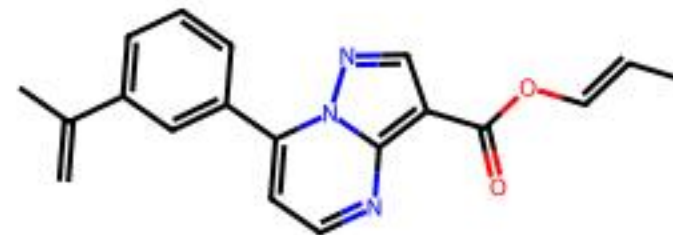

Reward: 0.69  
C=C(C)c1cccc(-c2ccnc3c(C(=O)OC=CC)cnn23)c1

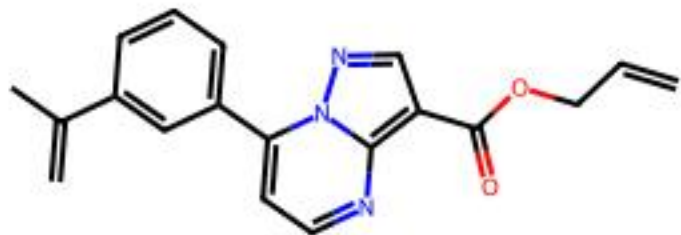

Reward: 0.69  
C=CCOC(=O)c1cnn2c(-c3cccc(C(=C)C)c3)ccnc12

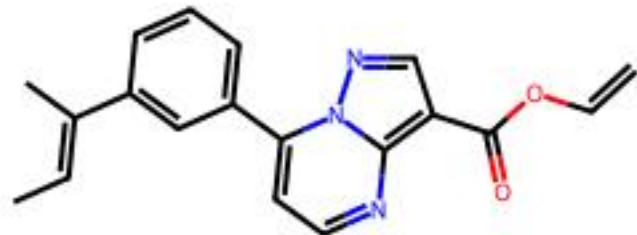

Reward: 0.69  
C=COC(=O)c1cnn2c(-c3cccc(C(C)=CC)c3)ccnc12

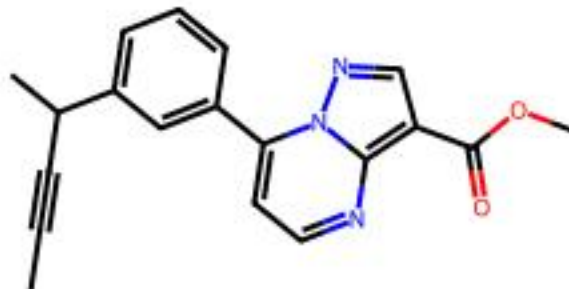

Reward: 0.69  
CC#CC(C)c1cccc(-c2ccnc3c(C(=O)OC)cnn23)c1

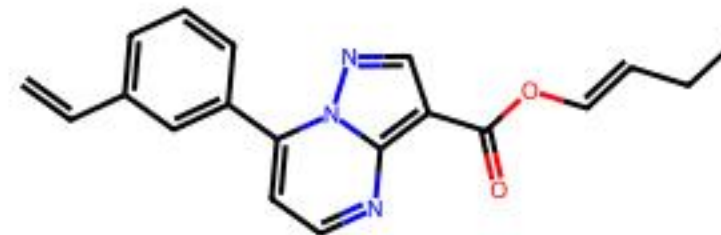

Reward: 0.69  
C=Cc1cccc(-c2ccnc3c(C(=O)OC=CCC)cnn23)c1

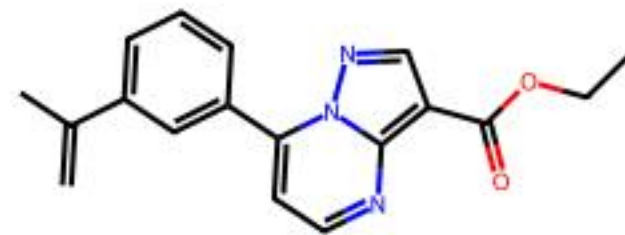

Reward: 0.68  
C=C(C)c1cccc(-c2ccnc3c(C(=O)OCC)cnn23)c1
