# Supplementary material
Source: ML conference proceedings conference paper supplement (https://openreview.net/forum?id=Qdu92a5DiM)
Supplement: supplementary_material [file vocab_cuda:0.pdf › ICLR/plots/tdc/amlodipine_mpo/vocab_cuda:0.pdf]

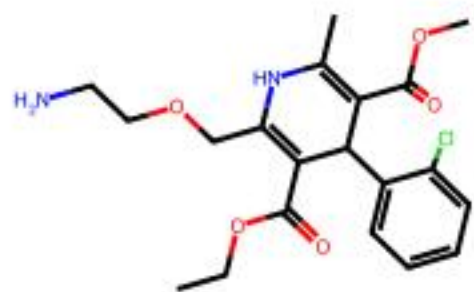

Target  
CCOC(=O)C1=C(NC(=C(C1C2=CC=CC=C2Cl)C(=O)OC)C)COCCN

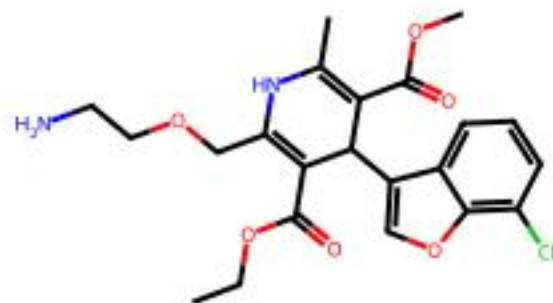

Reward: 0.88  
CCOC(=O)C1=C(COCCN)NC(C)=C(C(=O)OC)C1c1coc2c(Cl)cccc12

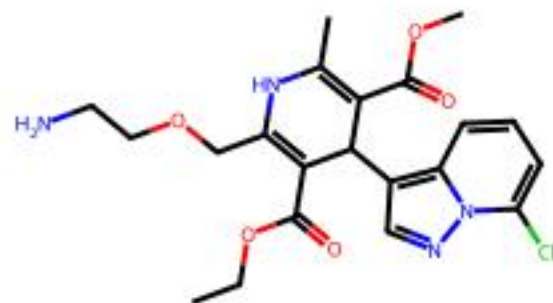

Reward: 0.86  
CCOC(=O)C1=C(COCCN)NC(C)=C(C(=O)OC)C1c1cnnc2c(Cl)cccc12

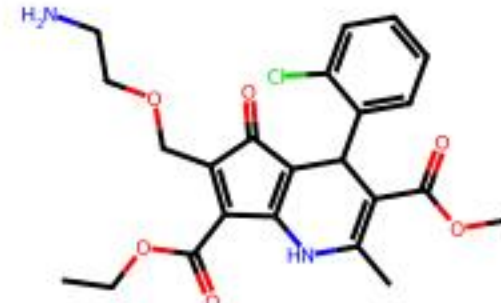

Reward: 0.85  
CCOC(=O)C1=C(COCCN)C(=O)C2=C1NC(C)=C(C(=O)OC)C2c1cccc1Cl

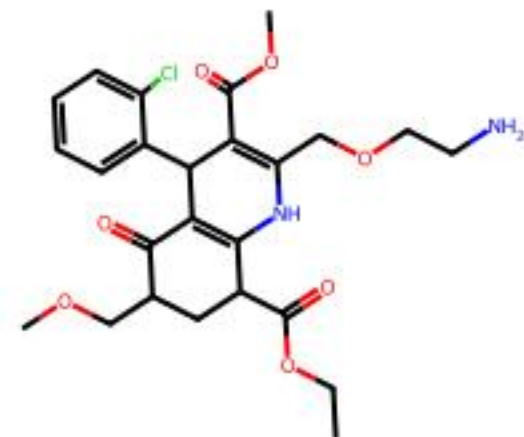

Reward: 0.79  
CCOC(=O)C1CC(COC)C(=O)C2=C1NC(COCCN)=C(C(=O)OC)C2c1cccc1Cl

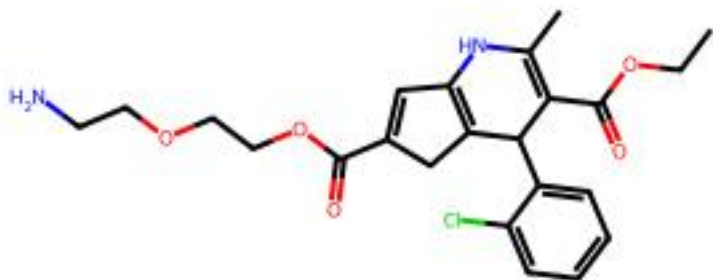

Reward: 0.79  
CCOC(=O)C1=C(C)NC2=C(C(C(C(=O)OCCOCCN)=C2)C1c1cccc1Cl

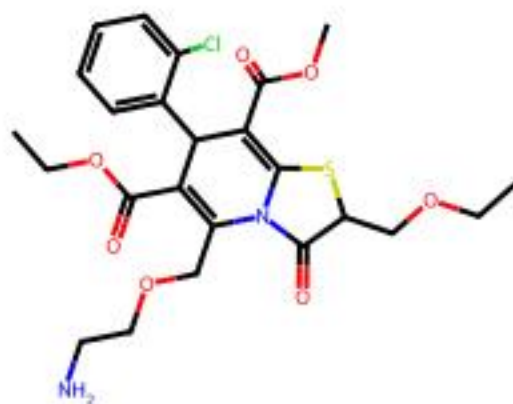

Reward: 0.78  
CCOCC1SC2=C(C(=O)OC)C(c3cccc3Cl)C(C(=O)OCC)=C(COCCN)N2C1=O

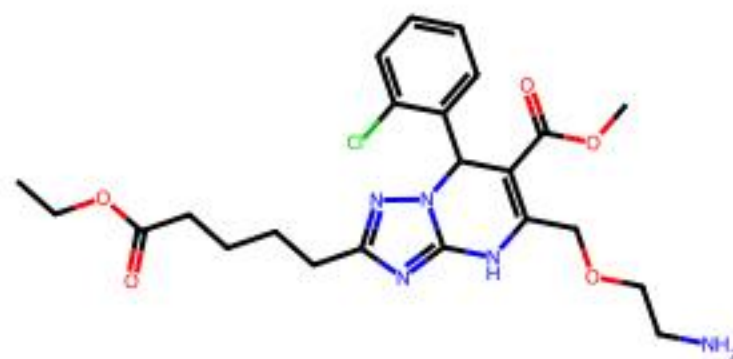

Reward: 0.76  
CCOC(=O)CCCCc1nc2n(n1)C(c1cccc1Cl)C(C(=O)OC)=C(COCCN)N2

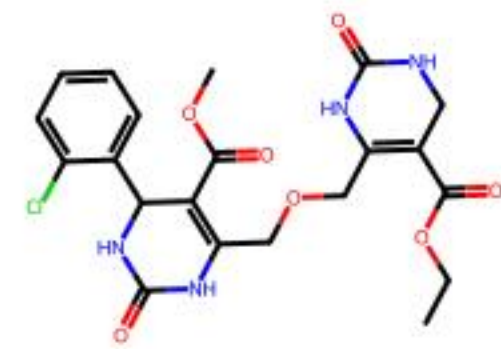

Reward: 0.71  
CCOC(=O)C1=C(COCC2=C(C(=O)OC)C(c3cccc3Cl)NC(=O)N2)NC(=O)NC1

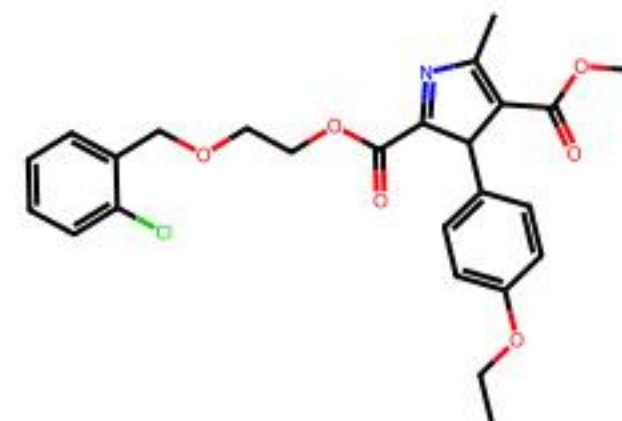

Reward: 0.67  
CCOc1ccc(C2C(C(=O)OCCOCc3cccc3Cl)=NC(C)=C2C(=O)OC)cc1

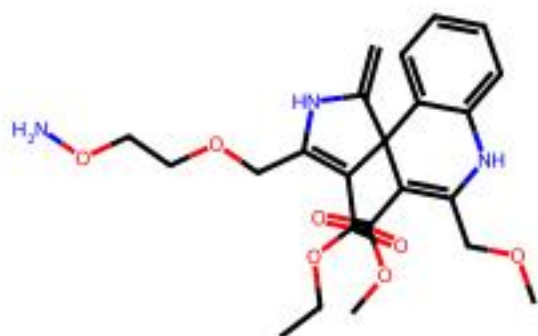

Reward: 0.66  
C=C1NC(COCCON)=C(C(=O)OCC)C12C(C(=O)OC)=C(COC)Nc1cccc12
