# Supplementary material
Source: ML conference proceedings conference paper supplement (https://openreview.net/forum?id=Qdu92a5DiM)
Supplement: supplementary_material [file vocab_cuda:0.pdf › ICLR/plots/tdc/celecoxib_rediscovery/vocab_cuda:0.pdf]

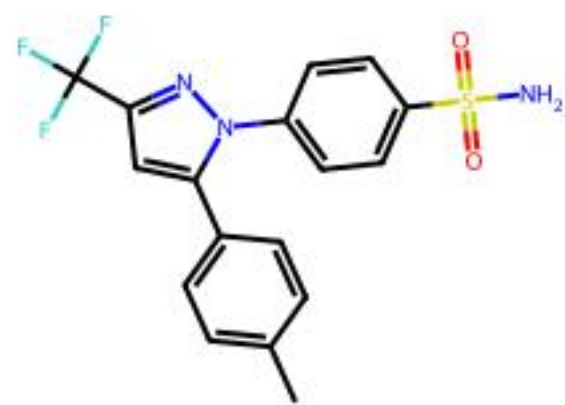

Target  
CC1=CC=C(C(C=C1)C2=CC(=NN2C3=CC=C(C(C=C3)S(=O)(=O)N)C(F)(F)F)C(F)(F)F)C(F)(F)F

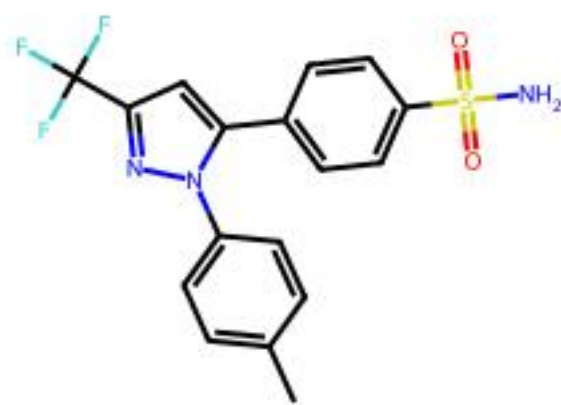

Reward: 1.00  
Cc1ccc(-n2nc(C(F)(F)F)cc2-c2ccc(S(N)(=O)=O)cc2)cc1

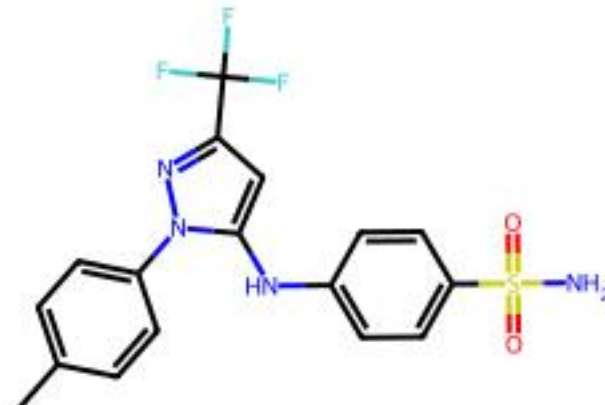

Reward: 0.77  
Cc1ccc(-n2nc(C(F)(F)F)cc2Nc2ccc(S(N)(=O)=O)cc2)cc1

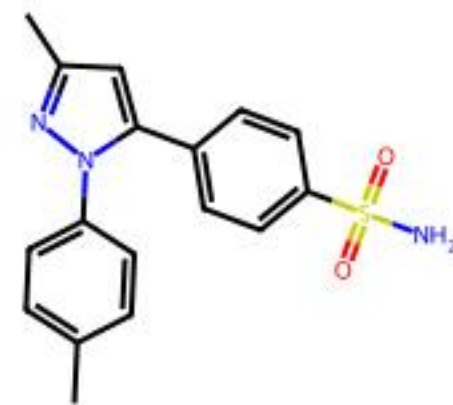

Reward: 0.75  
Cc1ccc(-n2nc(C)cc2-c2ccc(S(N)(=O)=O)cc2)cc1

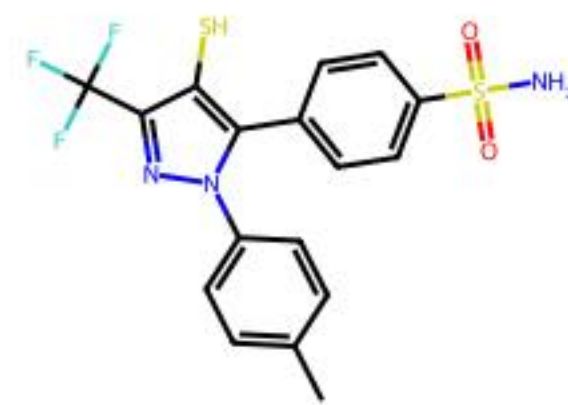

Reward: 0.71  
Cc1ccc(-n2nc(C(F)(F)F)c(S)c2-c2ccc(S(N)(=O)=O)cc2)cc1

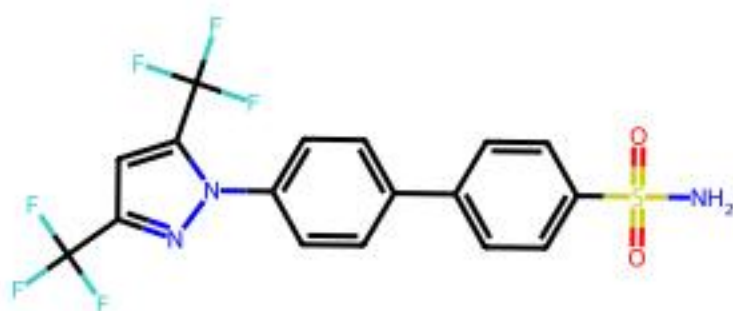

Reward: 0.67  
NS(=O)(=O)c1ccc(-c2ccc(-n3nc(C(F)(F)F)cc3C(F)(F)F)cc2)cc1

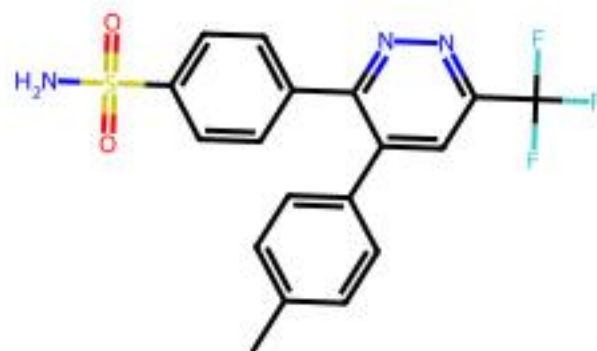

Reward: 0.65  
Cc1ccc(-c2cc(C(F)(F)F)nnc2-c2ccc(S(N)(=O)=O)cc2)cc1

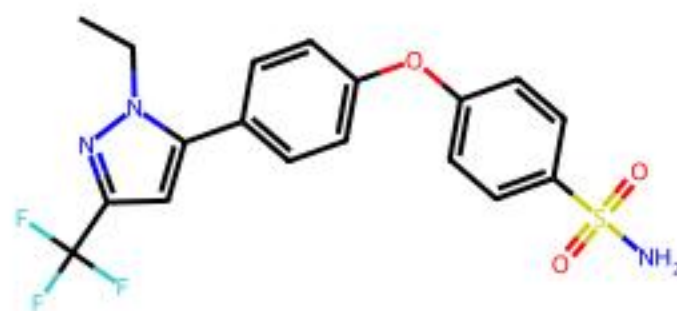

Reward: 0.64  
CCn1nc(C(F)(F)F)cc1-c1ccc(Oc2ccc(S(N)(=O)=O)cc2)cc1

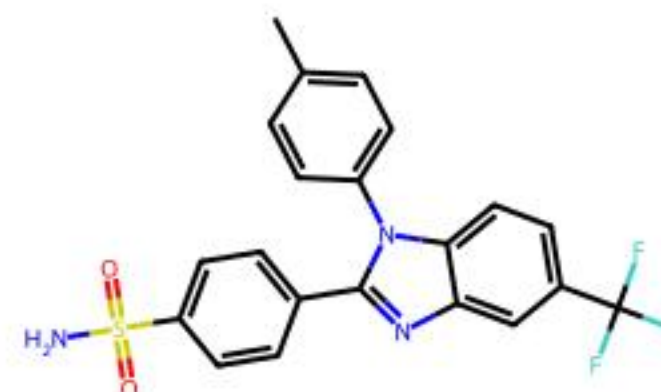

Reward: 0.62  
Cc1ccc(-n2c(-c3ccc(S(N)(=O)=O)cc3)nc3cc(C(F)(F)F)ccc32)cc1

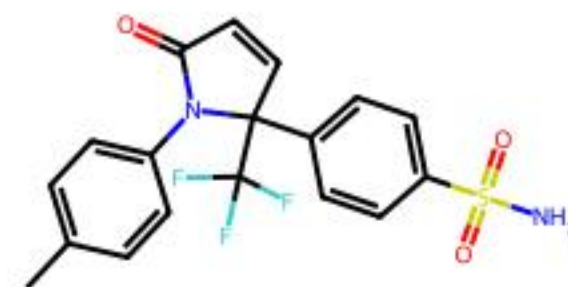

Reward: 0.57  
Cc1ccc(N2C(=O)C=CC2(c2ccc(S(N)(=O)=O)cc2)C(F)(F)F)cc1

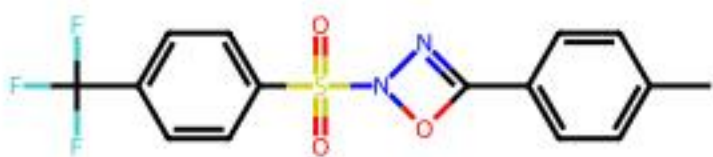

Reward: 0.56  
Cc1ccc(-c2nn(S(=O)(=O)c3ccc(C(F)(F)F)cc3)o2)cc1
