# Supplementary material
Source: ML conference proceedings conference paper supplement (https://openreview.net/forum?id=Qdu92a5DiM)
Supplement: supplementary_material [file vocab_cuda:0.pdf › ICLR/plots/tdc/deco_hop/vocab_cuda:0.pdf]

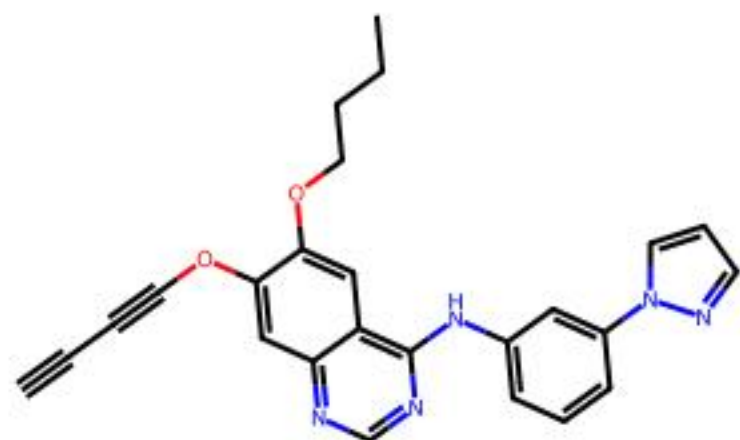

Reward: 0.99  
C#CC#COc1cc2ncnc(Nc3cccc(-n4cccn4)c3)c2cc1OCCCC

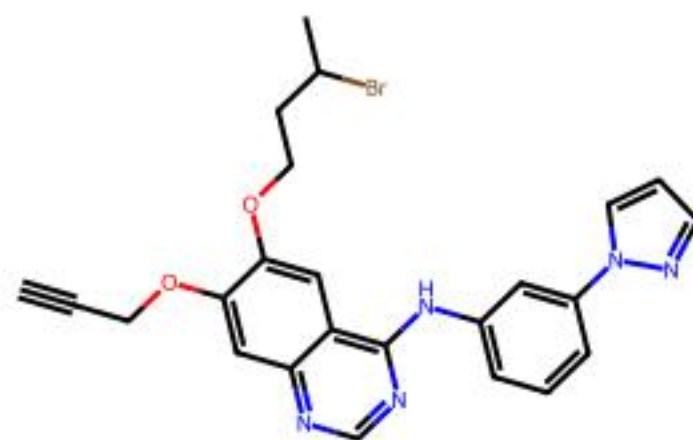

Reward: 0.99  
C#CCOc1cc2ncnc(Nc3cccc(-n4cccn4)c3)c2cc1OCCC(C)Br

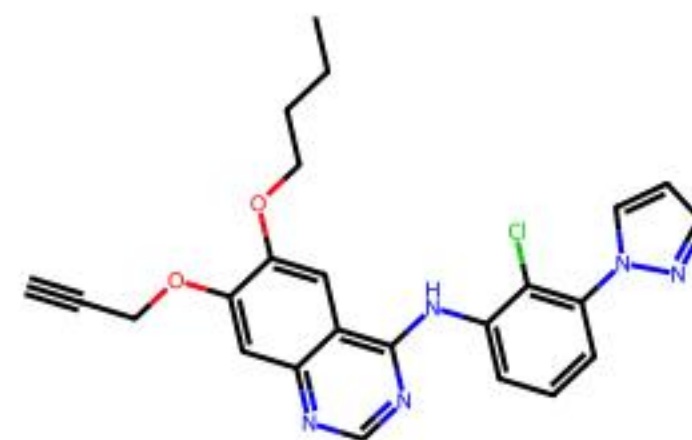

Reward: 0.97  
C#CCOc1cc2ncnc(Nc3cccc(-n4cccn4)c3Cl)c2cc1OCCCC

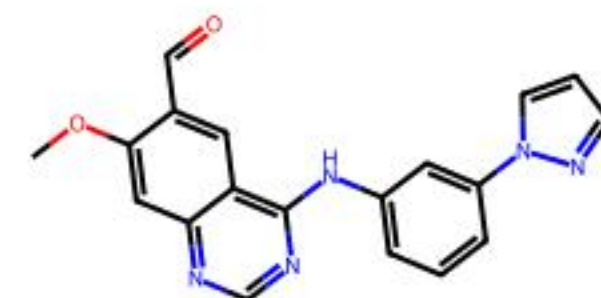

Reward: 0.97  
COc1cc2ncnc(Nc3cccc(-n4cccn4)c3)c2cc1C=O

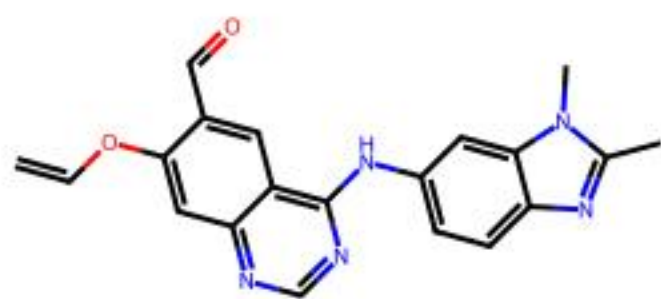

Reward: 0.96  
C=COc1cc2ncnc(Nc3ccc4nc(C)n(C)c4c3)c2cc1C=O

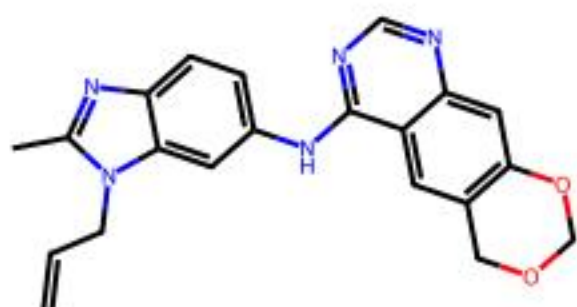

Reward: 0.96  
C=CCn1c(C)nc2ccc(Nc3ncnc4cc5c(cc34)COC(=O)5)cc21

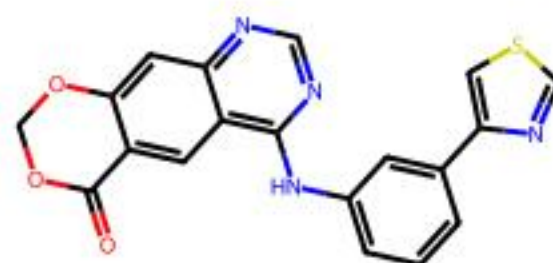

Reward: 0.96  
O=C1OCOc2cc3ncnc(Nc4cccc(-c5cscn5)c4)c3cc21

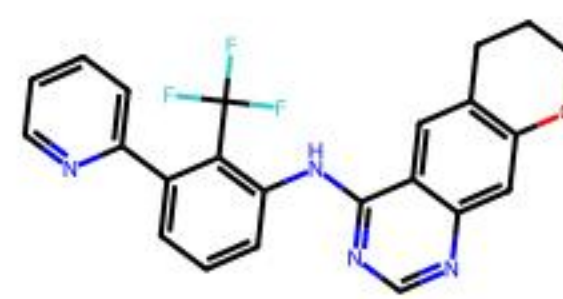

Reward: 0.94  
FC(F)(F)c1c(Nc2ncnc3cc4c(cc23)CCCO4)cccc1-c1cccn1

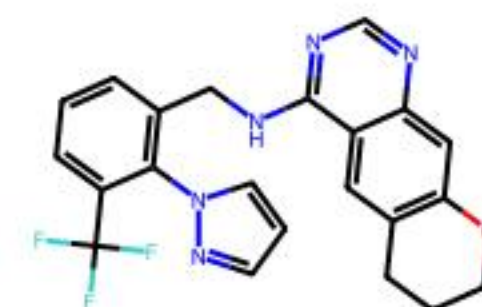

Reward: 0.93  
FC(F)(F)c1cccc(CNc2ncnc3cc4c(cc23)CCCO4)c1-n1cccn1

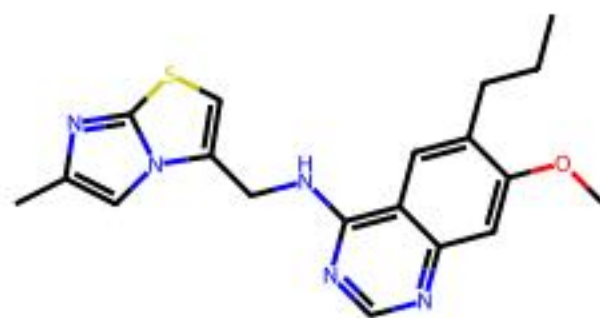

Reward: 0.92  
CCCC1cc2c(NCc3csc4nc(C)cn34)ncnc2cc1OC
