# Supplementary material
Source: ML conference proceedings conference paper supplement (https://openreview.net/forum?id=Qdu92a5DiM)
Supplement: supplementary_material [file vocab_cuda:0.pdf › ICLR/plots/tdc/drd2/vocab_cuda:0.pdf]

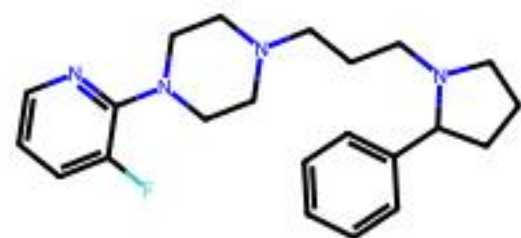

Reward: 1.00  
Fc1cccnc1N1CCN(CCCN2CCCC2c2ccccc2)CC1

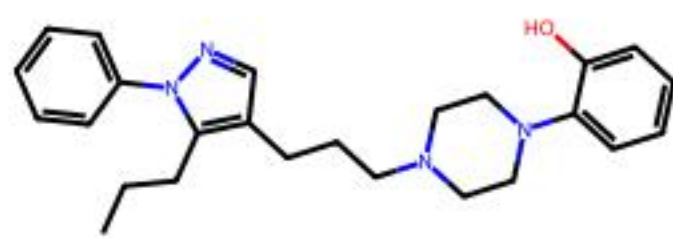

Reward: 1.00  
CCCC1c(CCCN2CCN(c3ccccc3O)CC2)cnn1-c1ccccc1

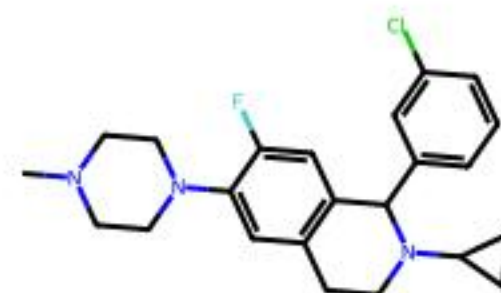

Reward: 1.00  
CN1CCN(c2cc3c(cc2F)C(c2ccccc2Cl)c2)N(C2CC2)CC3)CC1

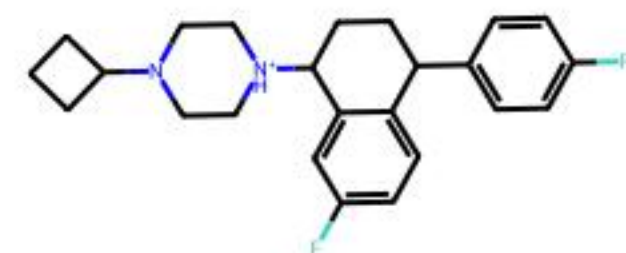

Reward: 0.99  
Fc1ccc(C2CCC([NH+]3CCN(C4CCC4)CC3)c3cc(F)ccc32)cc1

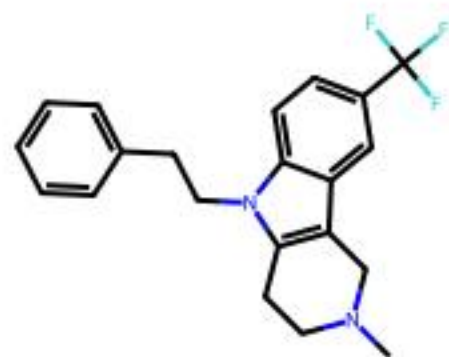

Reward: 0.97  
CN1CCc2c(c3cc(C(F)(F)F)ccc3n2CCc2ccccc2)C1

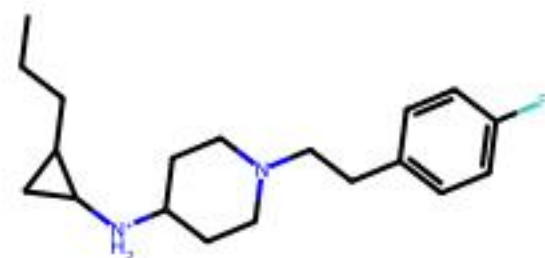

Reward: 0.97  
CCCC1CC1[NH2+]C1CCN(CCc2ccc(F)cc2)CC1

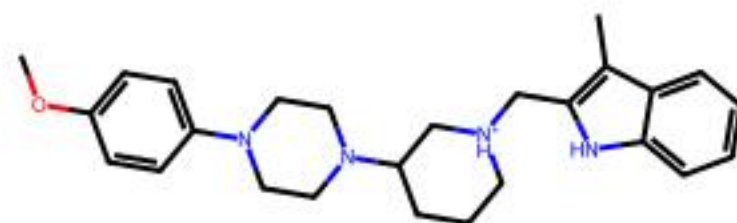

Reward: 0.97  
COc1ccc(N2CCN(C3CCC[NH+]1)(Cc4[nH]c5ccccc5c4C)C3)CC2)cc1

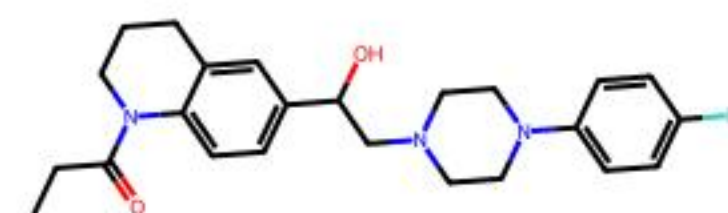

Reward: 0.96  
CCC(=O)N1CCCc2cc(C(O)CN3CCN(c4ccc(F)cc4)CC3)ccc21

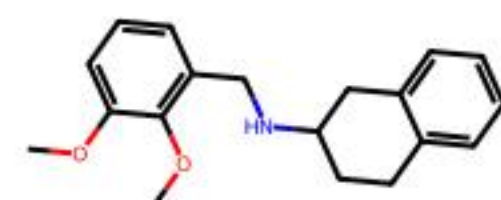

Reward: 0.96  
COc1cccc(CNC2CCc3ccccc3C2)c1OC

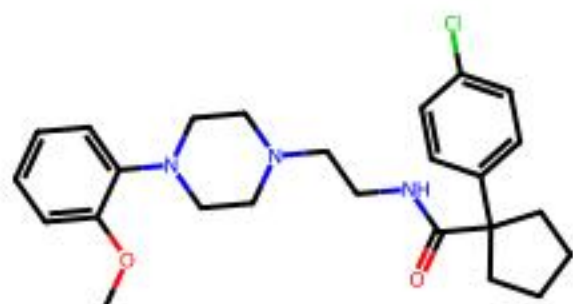

Reward: 0.95  
COc1ccccc1N1CCN(CCNC(=O)C2(c3ccc(Cl)cc3)CCCC2)CC1
