# Supplementary material
Source: ML conference proceedings conference paper supplement (https://openreview.net/forum?id=Qdu92a5DiM)
Supplement: supplementary_material [file vocab_cuda:0.pdf › ICLR/plots/tdc/fexofenadine_mpo/vocab_cuda:0.pdf]

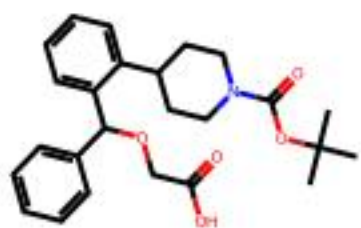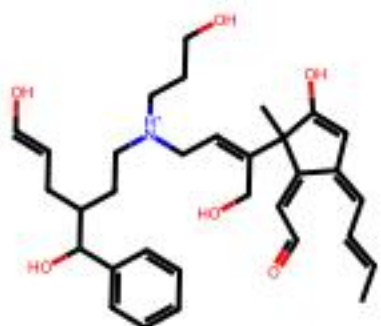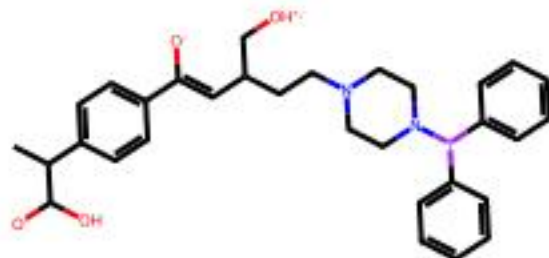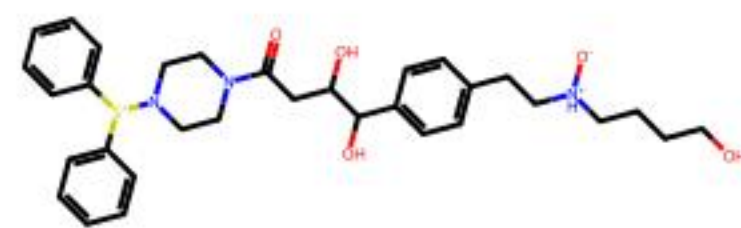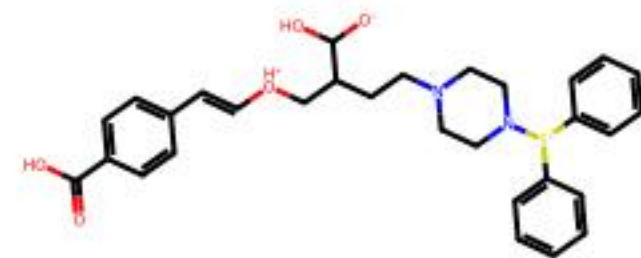

Target  
CC(C)(C)OC(=O)N1CCC(CC1)C2=CC=CC=C2C(C3=CC=CC=C3)OCC(=O)O

Reward: 0.88  
CC=CC=C1C=C(O)C(C)[C]=CC[NH+](CCCCO)CCC(CC=CO)C(O)c2ccccc2CO]C1=CC=O

Reward: 0.87  
CC(c1ccc(C([O-])=CC(C[OH+]))CCN2CCN1)(c3ccccc3)c3ccccc3)CC2)cc1)C([O-])O

Reward: 0.85  
O=C(CC(O)C(O)c1ccc(CC[NH+])([O-])CCCCO)cc1)N1CCN([5+])(c2ccccc2)c2ccccc2)CC1

Reward: 0.84  
O=C(O)c1ccc(C=C[OH+])CC(CCN2CCN1[5+])(c3ccccc3)c3ccccc3)CC2)C([O-])O)cc1

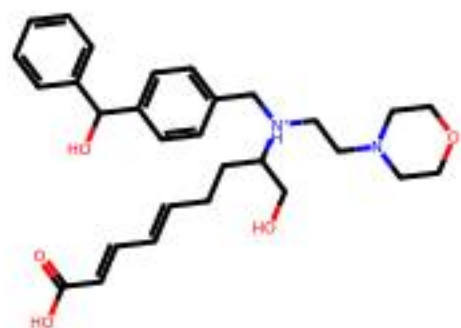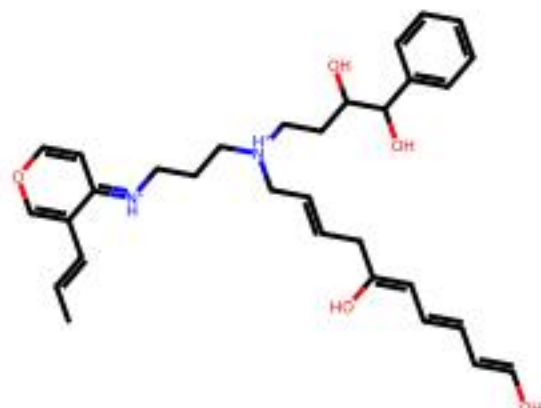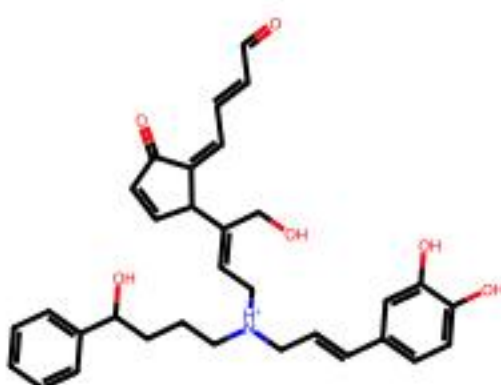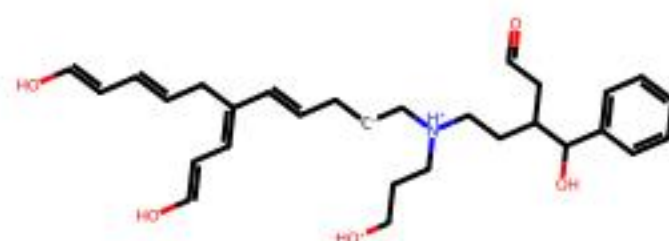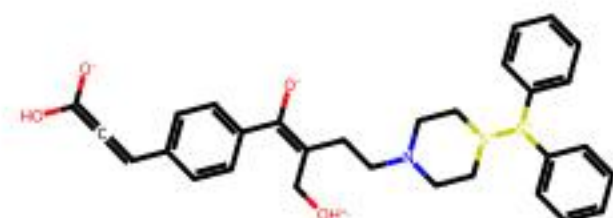

Reward: 0.84  
O=C(O)C=CC=CCCC(CO)(NH+)(CCN1CCOCC1)Cc1ccc(C(O)c2ccccc2)cc1

Reward: 0.84  
CC=Cc1ccccc1=[NH+]CCC[NH+](CC=CCC(O)=CC=CC=CO)CCC(O)C(O)c1ccccc1

Reward: 0.82  
O=CC=CC=C1C(=O)C=CC1C(=C[NH+])(CC=Cc1ccc(O)c(O)c1)CCCC(O)c1ccccc1)CO

Reward: 0.82  
O=CCC(CC[NH+])(C[CH-]CC=CC(=CC=CO)CC=CC=CO)CCC[OH+])C(O)c1ccccc1

Reward: 0.82  
[O-]C(O)=C=Cc1ccc(C([O-])=C(C[OH+])(CCN2CC[5+])([5+])(c3ccccc3)c3ccccc3)CC2)cc1

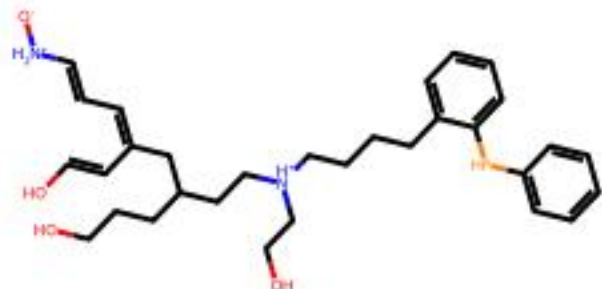

Reward: 0.82  
[O-][NH2+][C=CC=C(C=CO)CC(CCCO)CC[NH+])(CCO)CCCCc1ccccc1Pr1ccccc1
