# Supplementary material
Source: ML conference proceedings conference paper supplement (https://openreview.net/forum?id=Qdu92a5DiM)
Supplement: supplementary_material [file vocab_cuda:0.pdf › ICLR/plots/tdc/gsk3b/vocab_cuda:0.pdf]

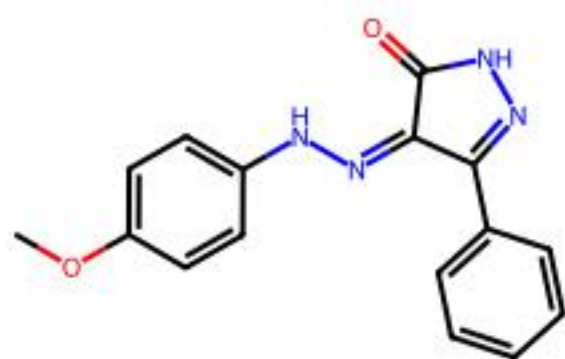

Reward: 1.00  
COc1ccc(NN=C2C(=O)NN=C2c2ccccc2)cc1

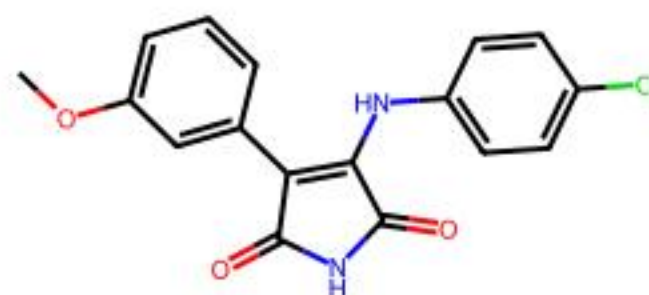

Reward: 0.98  
COc1cccc(C2=C(Nc3ccc(Cl)cc3)C(=O)NC2=O)c1

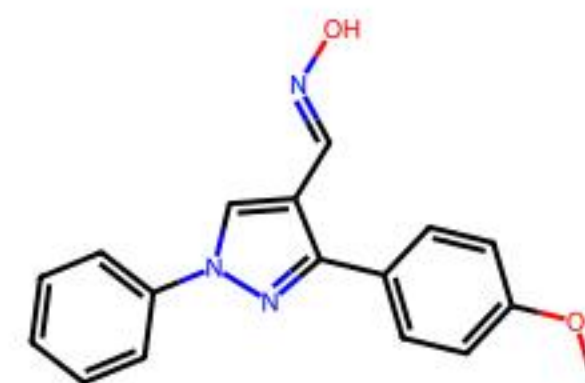

Reward: 0.96  
COc1ccc(-c2nn(-c3ccccc3)cc2C=NO)cc1

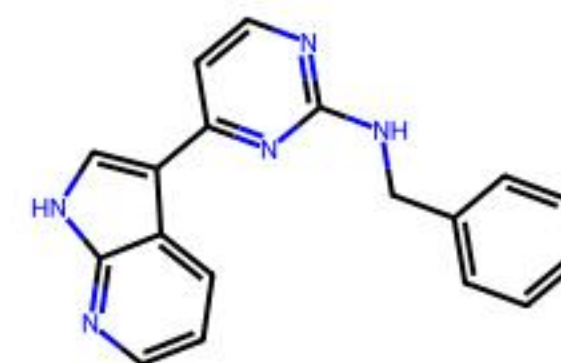

Reward: 0.96  
c1ccc(CNc2cccc(-c3c[nH]c4ncccc34)n2)cc1

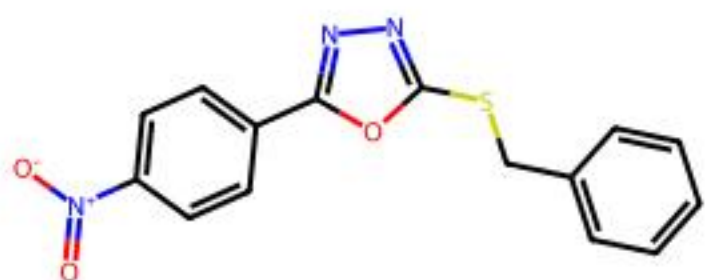

Reward: 0.95  
O=[N+]([O-])c1ccc(-c2nnc(SCc3ccccc3)o2)cc1

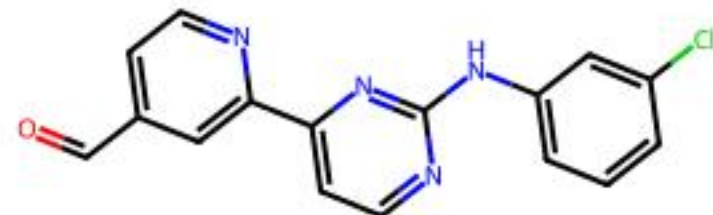

Reward: 0.95  
O=Cc1ccnc(-c2ccnc(Nc3cccc(Cl)c3)n2)c1

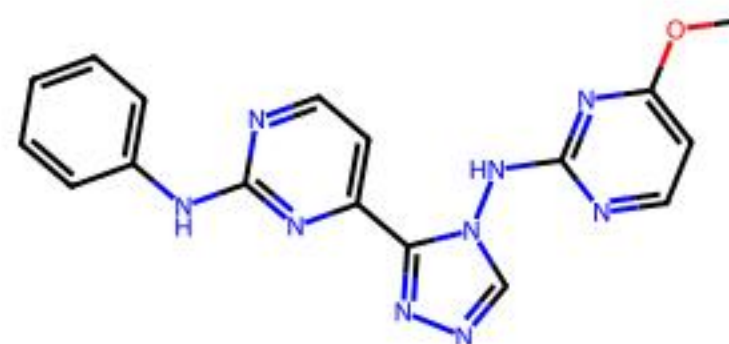

Reward: 0.90  
COc1ccnc(Nn2cnnc2-c2ccnc(Nc3ccccc3)n2)n1

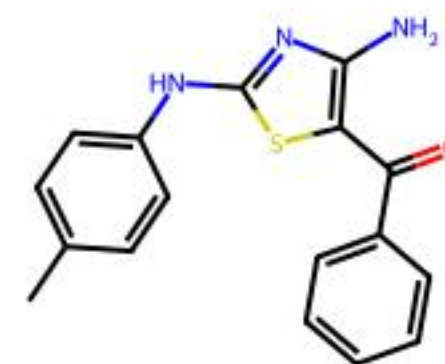

Reward: 0.89  
Cc1ccc(Nc2nc(N)c(C(=O)c3ccccc3)s2)cc1

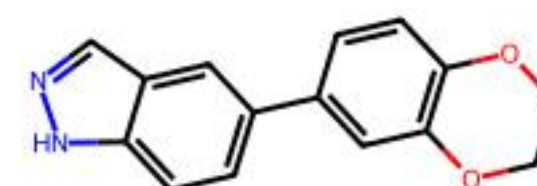

Reward: 0.88  
c1cc2c(cc1-c1ccc3[nH]ncc3c1)OCCO2

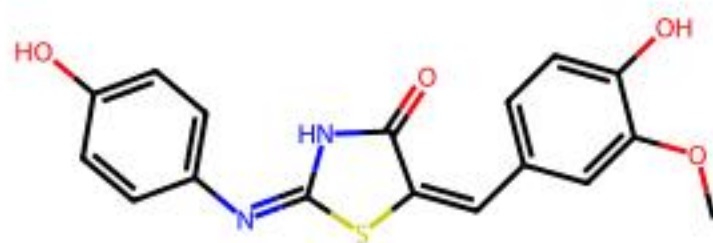

Reward: 0.88  
COc1cc(C=C2SC(=Nc3ccc(O)cc3)NC2=O)ccc1O
