# Supplementary material
Source: ML conference proceedings conference paper supplement (https://openreview.net/forum?id=Qdu92a5DiM)
Supplement: supplementary_material [file vocab_cuda:0.pdf › ICLR/plots/tdc/isomers_c7h8n2o2/vocab_cuda:0.pdf]

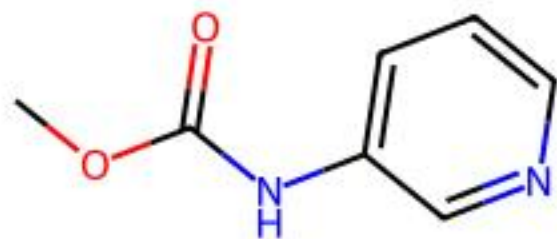

Reward: 1.00  
COC(=O)Nc1cccnc1

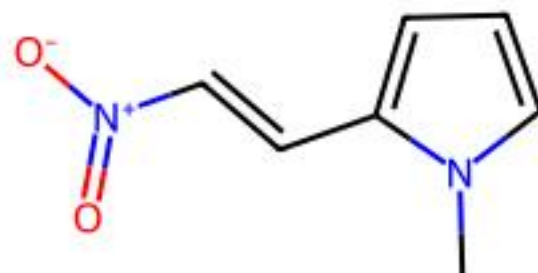

Reward: 1.00  
Cn1cccc1C=C[N+](=O)[O-]

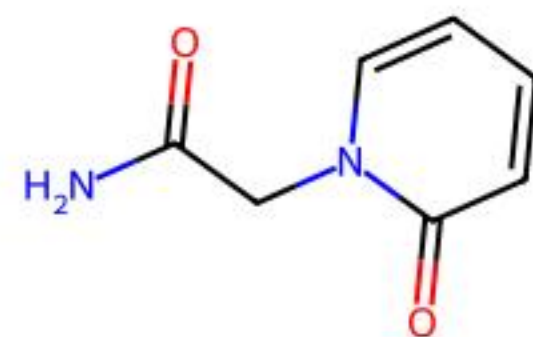

Reward: 1.00  
NC(=O)Cn1cccc1=O

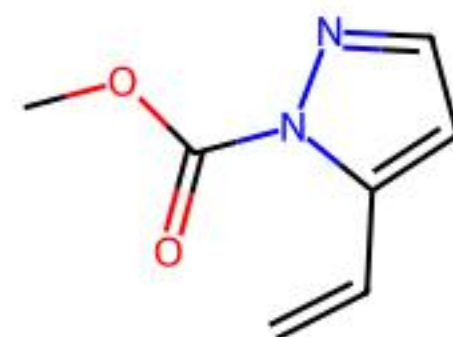

Reward: 1.00  
C=Cc1ccnn1C(=O)OC

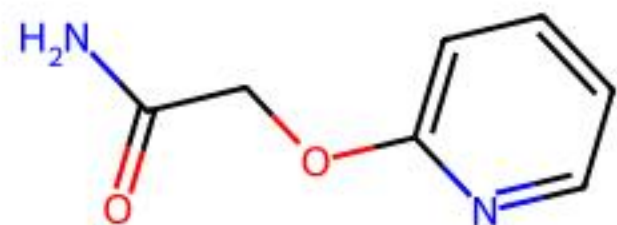

Reward: 1.00  
NC(=O)COc1ccccn1

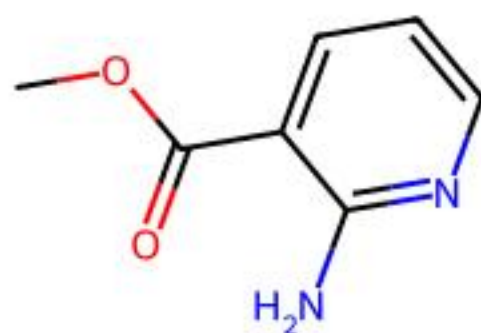

Reward: 1.00  
COC(=O)c1cccnc1N

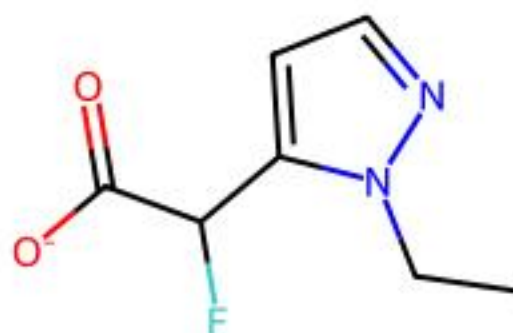

Reward: 0.98  
CCn1nccc1C(F)C(=O)[O-]

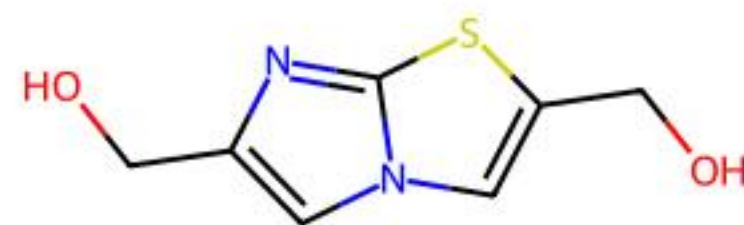

Reward: 0.98  
OCc1cn2cc(CO)sc2n1

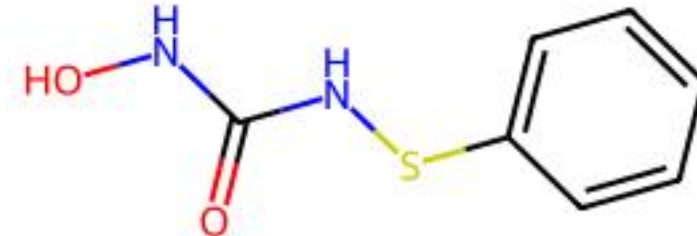

Reward: 0.98  
O=C(NO)NSc1ccccc1

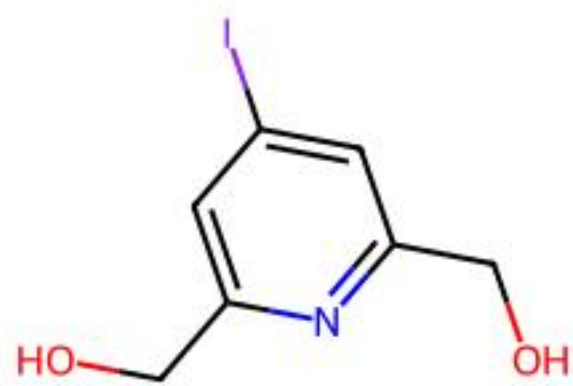

Reward: 0.90  
OCc1cc(I)cc(CO)n1
