# Supplementary material
Source: ML conference proceedings conference paper supplement (https://openreview.net/forum?id=Qdu92a5DiM)
Supplement: supplementary_material [file vocab_cuda:0.pdf › ICLR/plots/tdc/isomers_c9h10n2o2pf2cl/vocab_cuda:0.pdf]

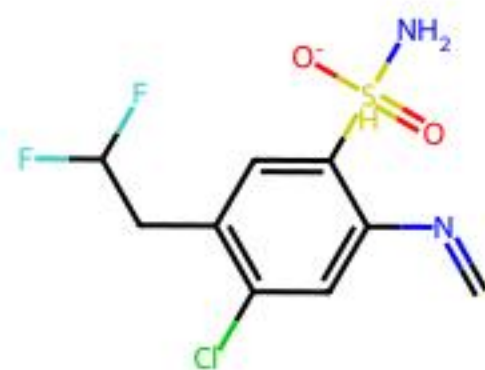

Reward: 0.94  
C=Nc1cc(Cl)c(CC(F)F)cc1[SH](N)(=O)[O-]

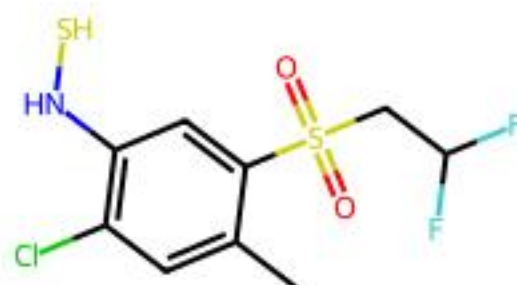

Reward: 0.88  
Cc1cc(Cl)c(NS)cc1S(=O)(=O)CC(F)F

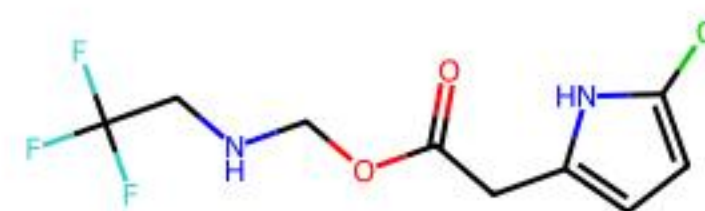

Reward: 0.88  
O=C(Cc1ccc(Cl)[nH]1)OCNCC(F)(F)F

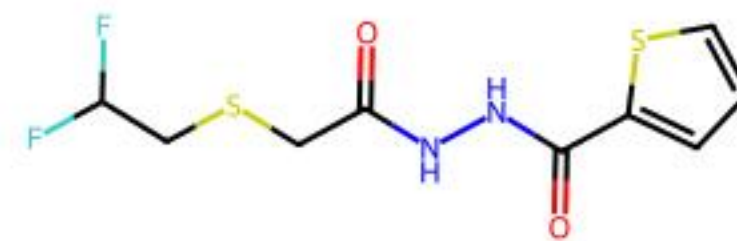

Reward: 0.88  
O=C(CSCC(F)F)NNC(=O)c1cccs1

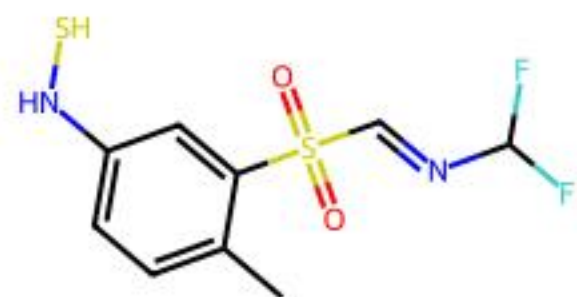

Reward: 0.88  
Cc1ccc(NS)cc1S(=O)(=O)C=NC(F)F

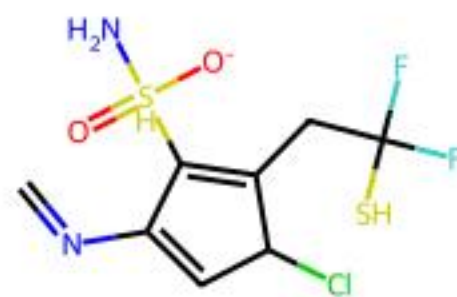

Reward: 0.88  
C=NC1=CC(Cl)C(CC(F)F)S=C1[SH](N)(=O)[O-]

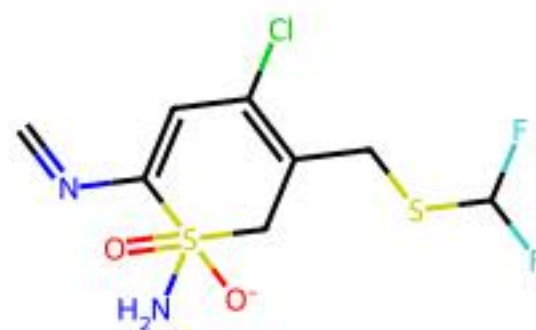

Reward: 0.88  
C=NC1=CC(Cl)=C(CSC(F)F)CS1(N)(=O)[O-]

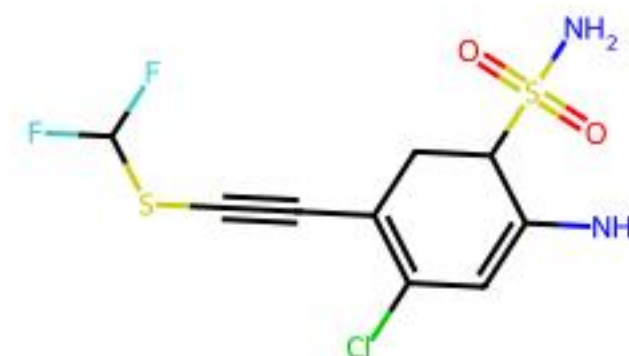

Reward: 0.88  
NC1=CC(Cl)=C(C#CSC(F)F)CC1S(N)(=O)=O

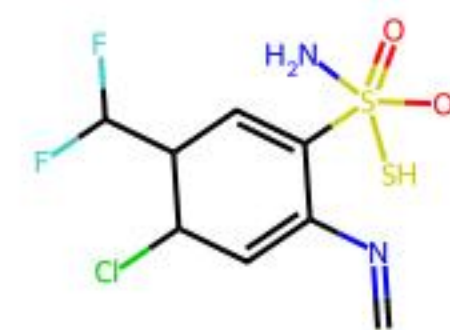

Reward: 0.88  
C=NC1=CC(Cl)C(C(F)F)C=C1S(N)(=O)[O-]S

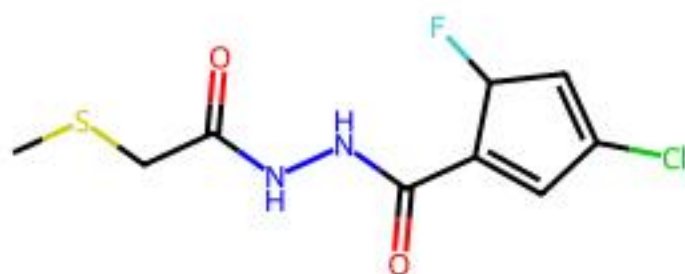

Reward: 0.87  
CSCC(=O)NNC(=O)C1=CC(Cl)=CC1F
