# Supplementary material
Source: ML conference proceedings conference paper supplement (https://openreview.net/forum?id=Qdu92a5DiM)
Supplement: supplementary_material [file vocab_cuda:0.pdf › ICLR/plots/tdc/jnk3/vocab_cuda:0.pdf]

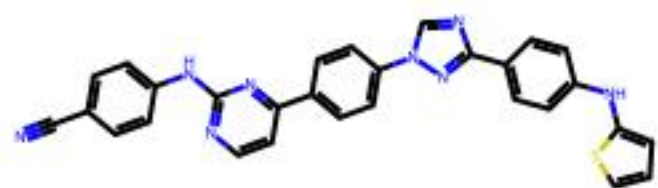

Reward: 0.98  
N#Cc1ccc(Nc2nccc(-c3ccc(-n4cnc(-c5ccc(Nc6cccs6)cc5)n4)cc3)n2)cc1

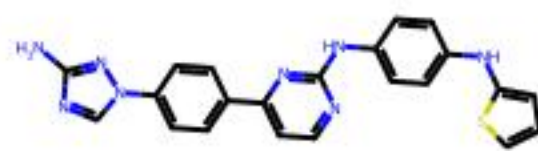

Reward: 0.97  
Nc1ncn(-c2ccc(-c3ccnc(Nc4ccc(Nc5cccs5)cc4)n3)cc2)n1

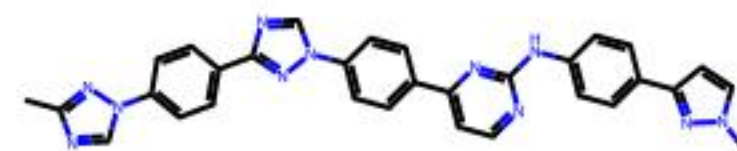

Reward: 0.97  
Cc1ncn(-c2ccc(-c3ncn(-c4ccc(-c5ccnc(Nc6ccc(-c7ccn(C)n7)cc6)n5)cc4)n3)cc2)n1

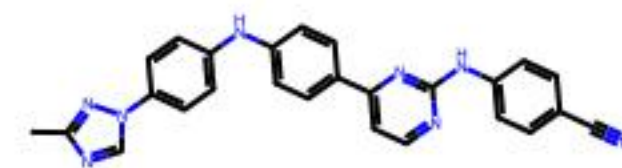

Reward: 0.97  
Cc1ncn(-c2ccc(Nc3ccc(-c4ccnc(Nc5cccc(C#N)cc5)n4)cc3)cc2)n1

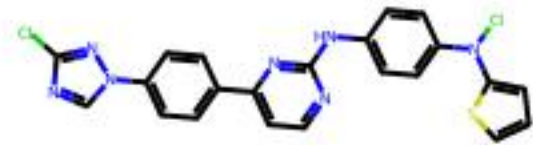

Reward: 0.96  
Clc1ncn(-c2ccc(-c3ccnc(Nc4ccc(N(Cl)c5cccs5)cc4)n3)cc2)n1

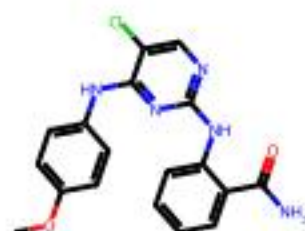

Reward: 0.94  
COc1ccc(Nc2nc(Nc3ccccc3C(N)=O)ncc2Cl)cc1

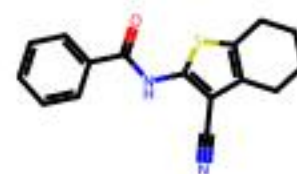

Reward: 0.77  
N#Cc1c(NC(=O)c2ccccc2)sc2c1CCCC2

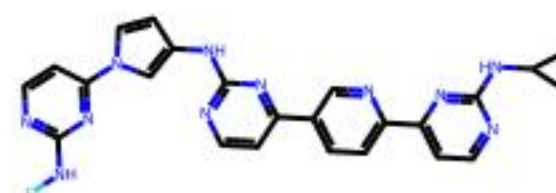

Reward: 0.77  
FNc1nccc(-n2ccc(Nc3nccc(-c4ccc(-c5ccnc(NC6CC6)n5)nc4)n3)c2)n1

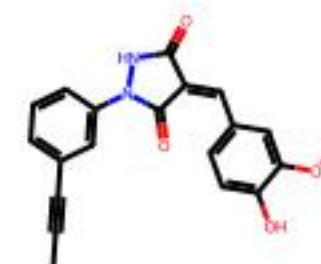

Reward: 0.67  
CC#Cc1cccc(N2NC(=O)C(=Cc3ccc(O)c(OC)c3)C2=O)c1

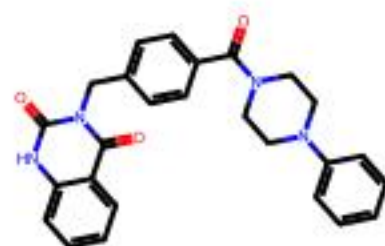

Reward: 0.66  
O=C(c1ccc(Cn2c(=O)[nH]c3ccccc3c2=O)cc1)N1CCN(c2ccccc2)CC1
