# Supplementary material
Source: ML conference proceedings conference paper supplement (https://openreview.net/forum?id=Qdu92a5DiM)
Supplement: supplementary_material [file vocab_cuda:0.pdf › ICLR/plots/tdc/median1/vocab_cuda:0.pdf]

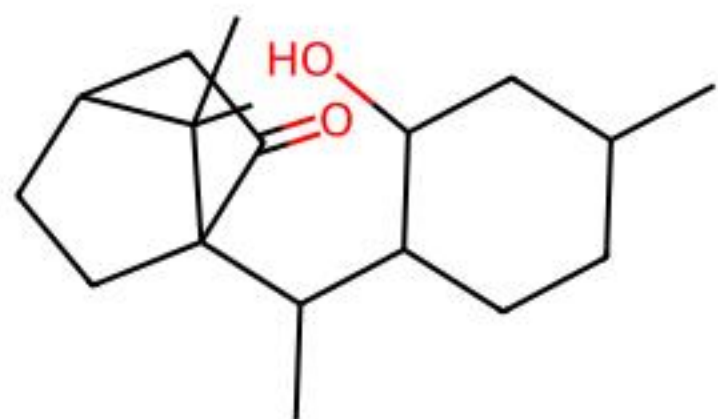

Reward: 0.41  
CC1CCC(C(C)C23CCC(CC2=O)C3(C)C)C(O)C1

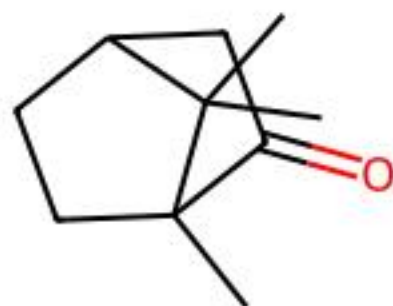

Reward: 0.40  
CC12CCC(CC1=O)C2(C)C

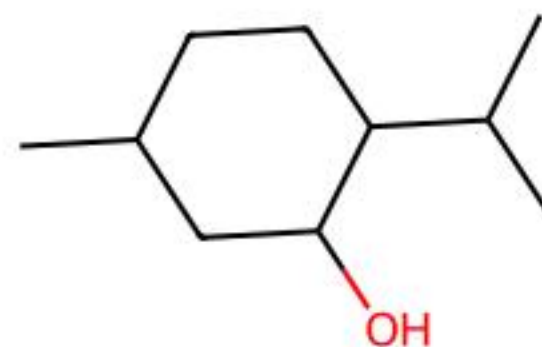

Reward: 0.40  
CC1CCC(C(C)C)C(O)C1

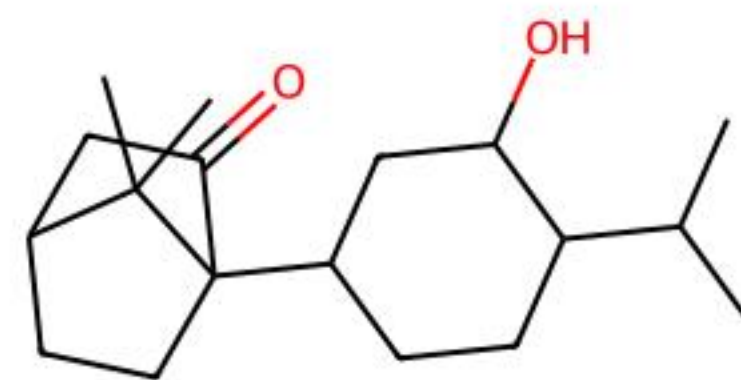

Reward: 0.39  
CC(C)C1CCC(C23CCC(CC2=O)C3(C)C)CC1O

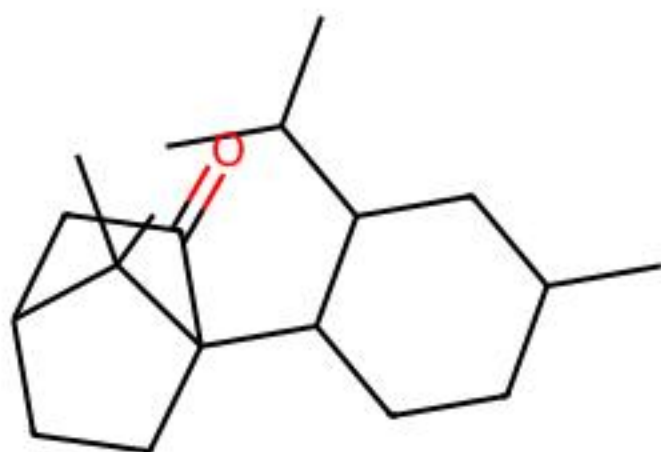

Reward: 0.37  
CC1CCC(C23CCC(CC2=O)C3(C)C)C(C(C)C)C1

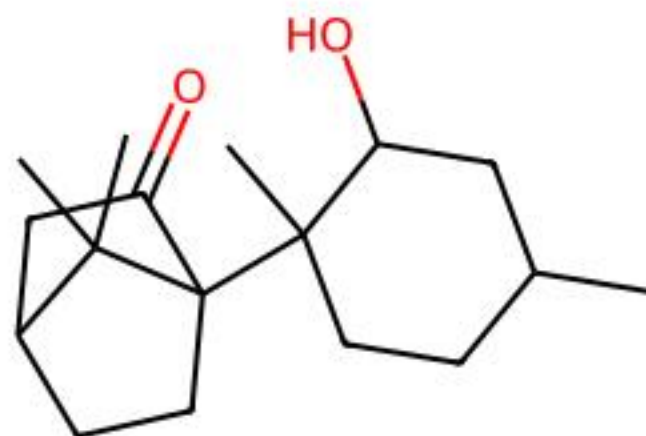

Reward: 0.34  
CC1CCC(C)(C23CCC(CC2=O)C3(C)C)C(O)C1

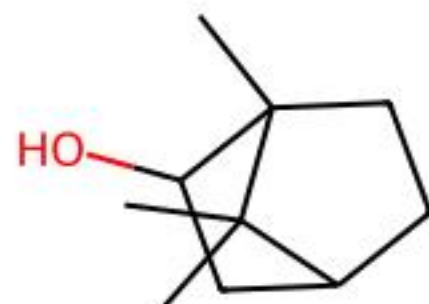

Reward: 0.33  
CC1(C)C2CCC1(C)C(O)C2

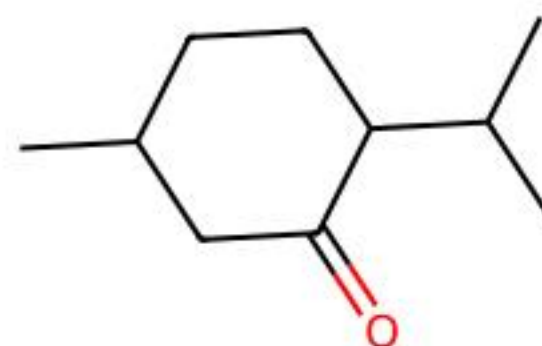

Reward: 0.33  
CC1CCC(C(C)C)C(=O)C1

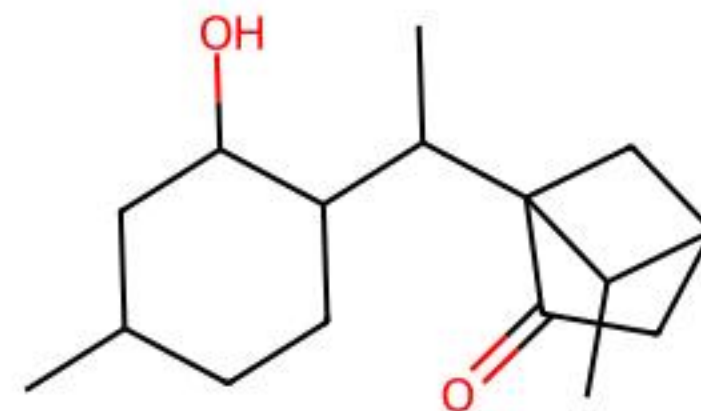

Reward: 0.32  
CC1CCC(C(C)C23CC(CC2=O)C3C)C(O)C1

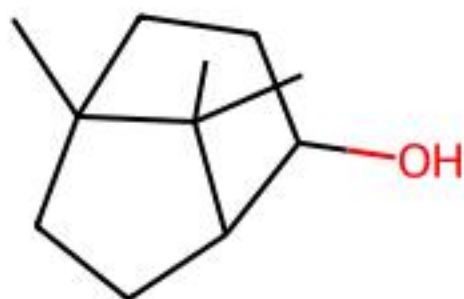

Reward: 0.30  
CC12CCC(O)C(CC1)C2(C)C
