# Supplementary material
Source: ML conference proceedings conference paper supplement (https://openreview.net/forum?id=Qdu92a5DiM)
Supplement: supplementary_material [file vocab_cuda:0.pdf › ICLR/plots/tdc/median2/vocab_cuda:0.pdf]

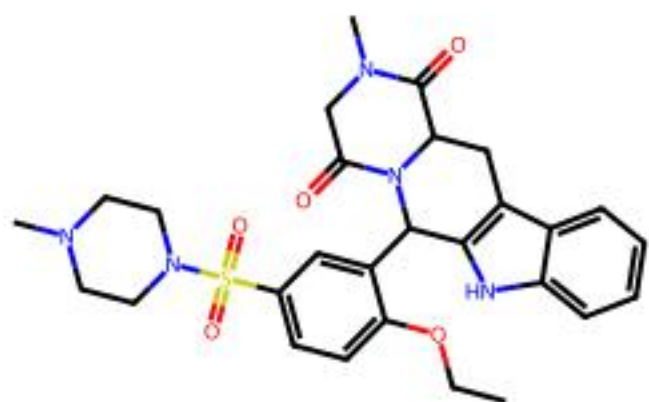

Reward: 0.41  
CCOc1ccc(S(=O)(=O)N2CCN(C)CC2)cc1C1c2[nH]c3ccccc3c2CC2C(=O)N(C)CC(=O)N21

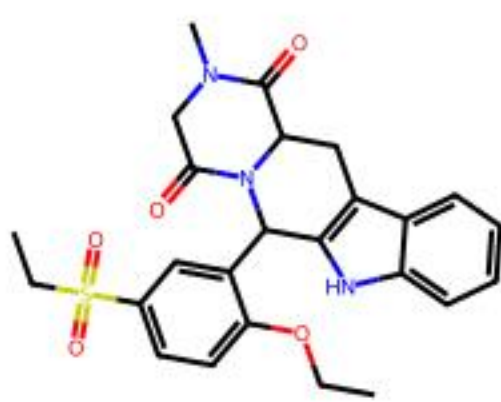

Reward: 0.35  
CCOc1ccc(S(=O)(=O)CC)cc1C1c2[nH]c3ccccc3c2CC2C(=O)N(C)CC(=O)N21

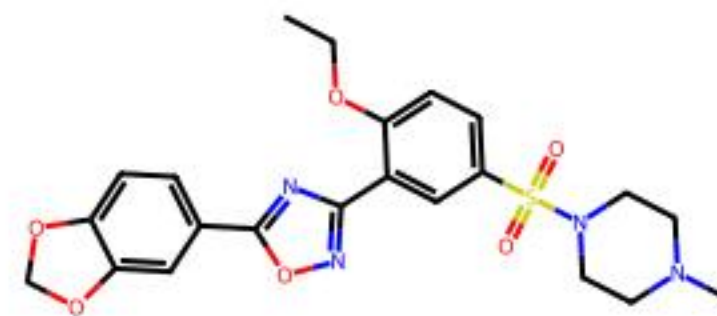

Reward: 0.32  
CCOc1ccc(S(=O)(=O)N2CCN(C)CC2)cc1-c1noc(-c2ccc3c(c2)OCO3)n1

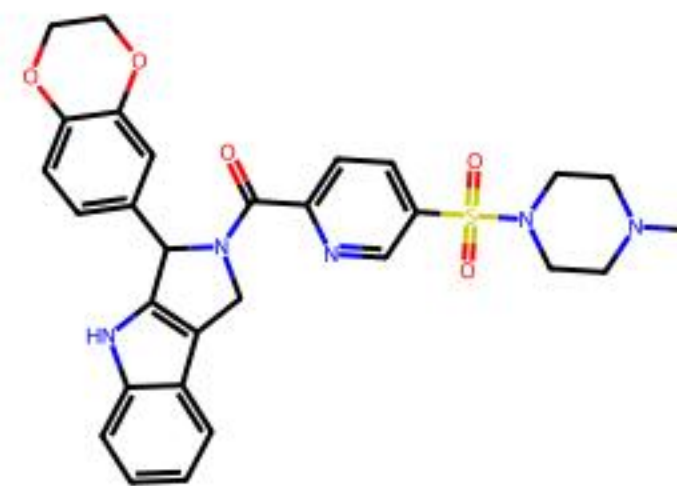

Reward: 0.31  
CN1CCN(S(=O)(=O)c2ccc(C(=O)N3Cc4c[nH]c5ccccc45)C3c3ccc4c(c3)OCCO4)nc2)CC1

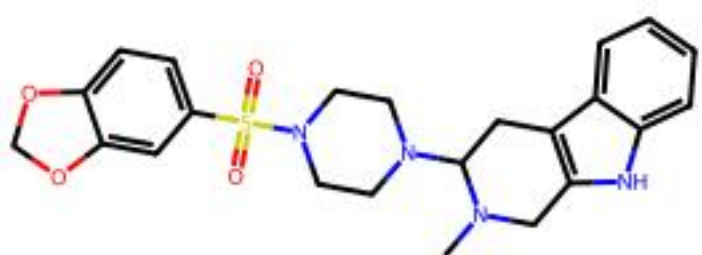

Reward: 0.30  
CN1Cc2[nH]c3ccccc3c2CC1N1CCN(S(=O)(=O)c2ccc3c(c2)OCO3)CC1

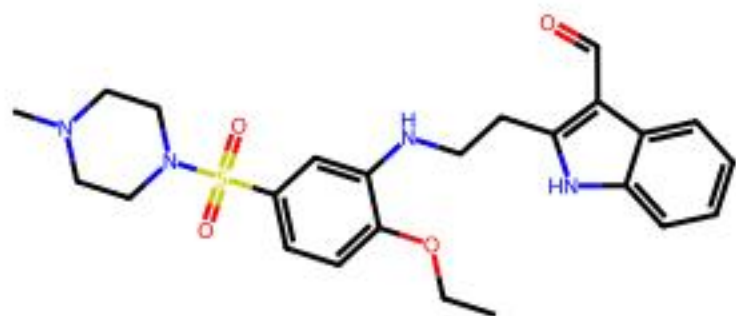

Reward: 0.30  
CCOc1ccc(S(=O)(=O)N2CCN(C)CC2)cc1NCCc1[nH]c2ccccc2c1C=O

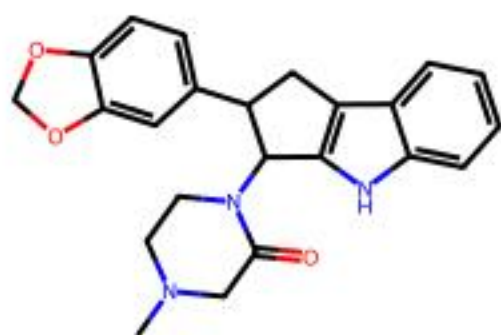

Reward: 0.29  
CN1CCN(C2c3[nH]c4ccccc4c3CC2c2ccc3c(c2)OCO3)C(=O)C1

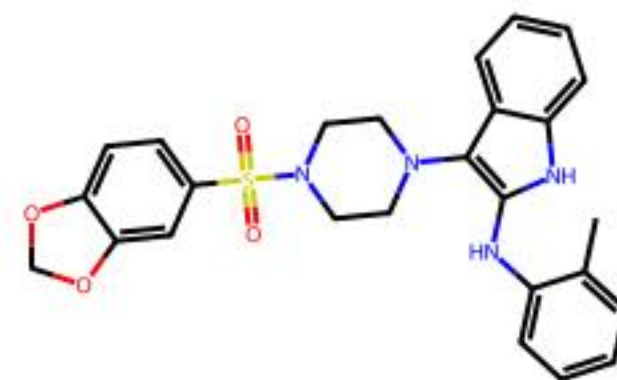

Reward: 0.27  
Cc1ccccc1Nc1[nH]c2ccccc2c1N1CCN(S(=O)(=O)c2ccc3c(c2)OCO3)CC1

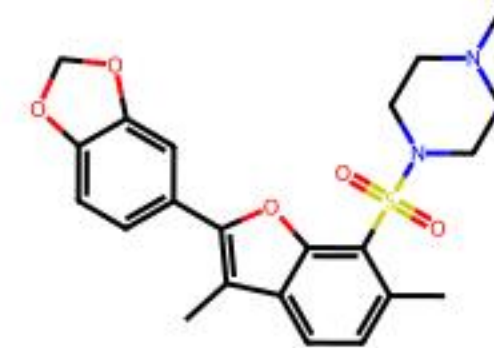

Reward: 0.26  
Cc1ccc2c(C)c(-c3ccc4c(c3)OCO4)oc2c1S(=O)(=O)N1CCN(C)CC1

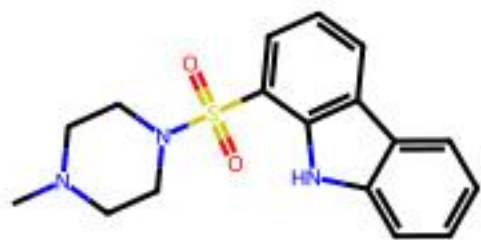

Reward: 0.26  
CN1CCN(S(=O)(=O)c2ccccc2c2[nH]c2ccccc23)CC1
