# Supplementary material
Source: ML conference proceedings conference paper supplement (https://openreview.net/forum?id=Qdu92a5DiM)
Supplement: supplementary_material [file vocab_cuda:0.pdf › ICLR/plots/tdc/mestranol_similarity/vocab_cuda:0.pdf]

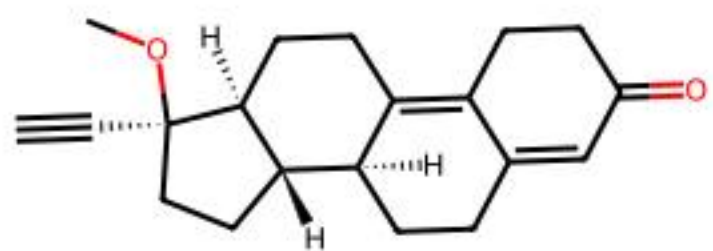

Target  
C#C[C@]1(CC[C@H]2[C@@H]3CCC4=CC(=O)CCC4=C3CC[C@H]12)OC

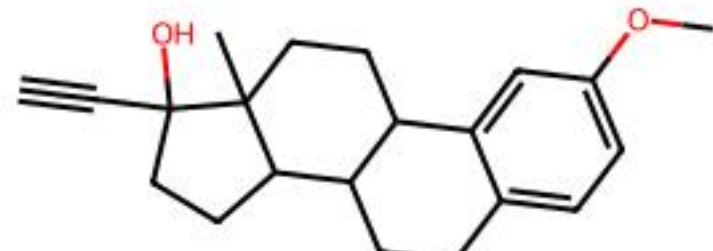

Reward: 1.00  
C#CC1(O)CCC2C3CCc4ccc(OC)cc4C3CCC21C

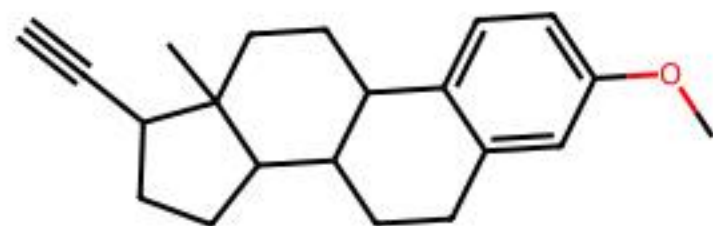

Reward: 1.00  
C#CC1CCC2C3CCc4cc(OC)ccc4C3CCC12C

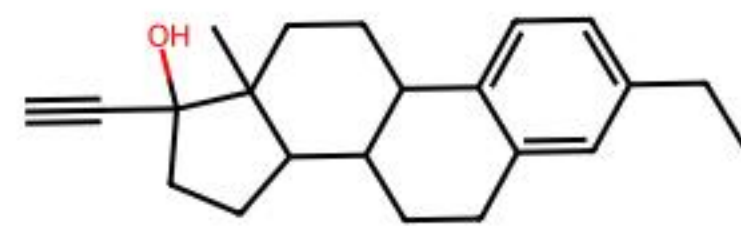

Reward: 1.00  
C#CC1(O)CCC2C3CCc4cc(CC)ccc4C3CCC21C

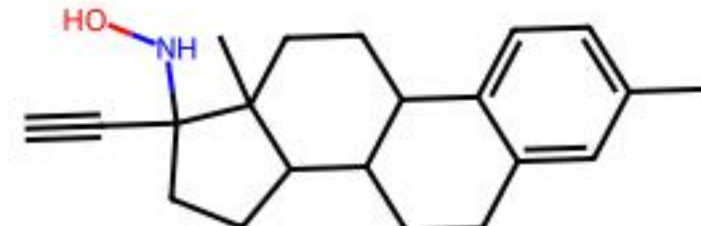

Reward: 0.96  
C#CC1(NO)CCC2C3CCc4cc(C)ccc4C3CCC21C

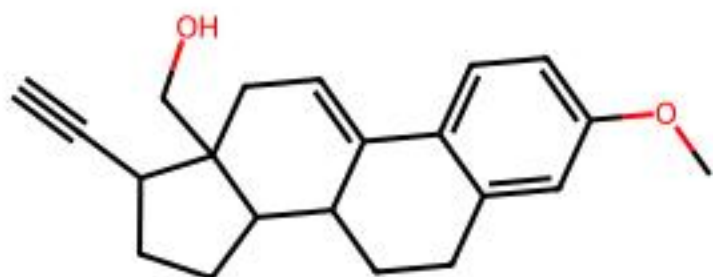

Reward: 0.81  
C#CC1CCC2C3CCc4cc(OC)ccc4C3=CCC12CO

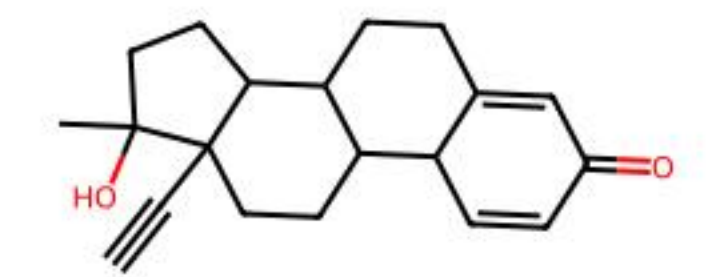

Reward: 0.78  
C#CC12CCC3C4C=CC(=O)C=C4CCC3C1CCC2(C)O

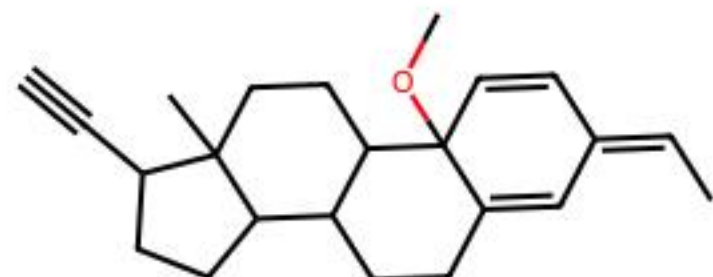

Reward: 0.74  
C#CC1CCC2C3CCC4=CC(=CC)C=CC4(OC)C3CCC12C

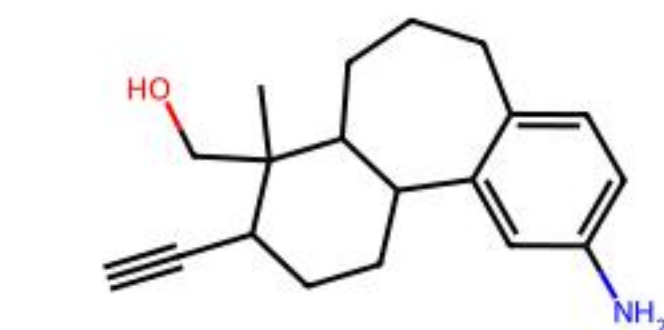

Reward: 0.71  
C#CC1CCC2c3cc(N)ccc3CCCC2C1(C)CO

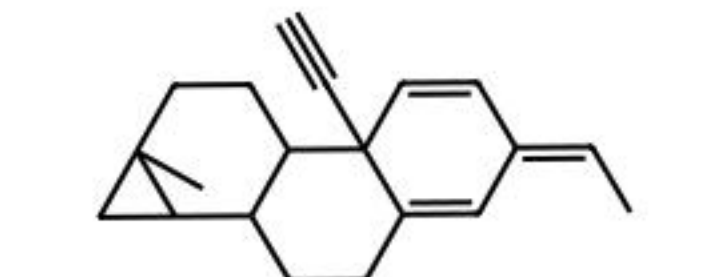

Reward: 0.64  
C#CC12C=CC(=CC)C=C1CCC1C3CC3(C)CCC12

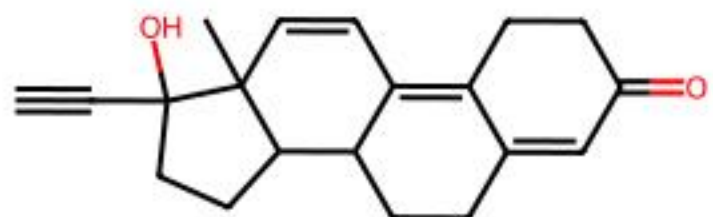

Reward: 0.63  
C#CC1(O)CCC2C3CCC4=CC(=O)CCC4=C3C=CC21C
