# Supplementary material
Source: ML conference proceedings conference paper supplement (https://openreview.net/forum?id=Qdu92a5DiM)
Supplement: supplementary_material [file vocab_cuda:0.pdf › ICLR/plots/tdc/osimertinib_mpo/vocab_cuda:0.pdf]

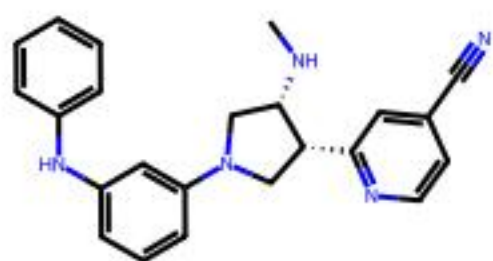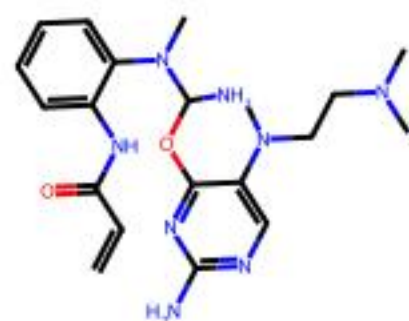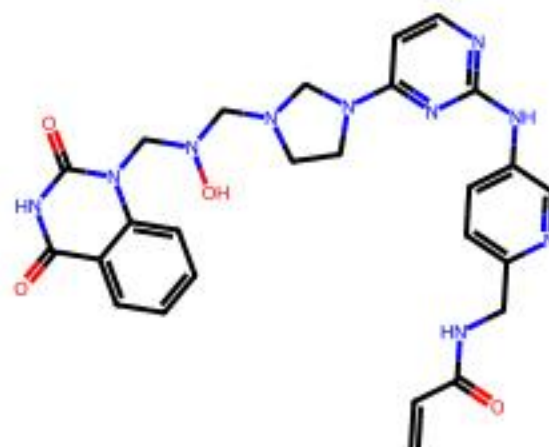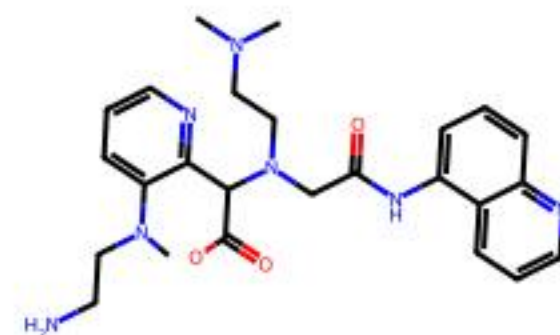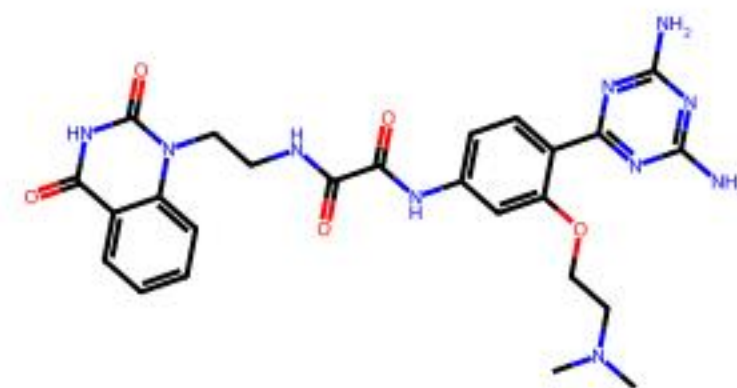

Target  
CN[C@H]1CN[C[C@H]1C2=NC=CC(=C2)C#N)C3=CC(=CC=C3)NC4=CC=CC=C4

Reward: 0.91  
C=CC(=O)Nc1ccccc1N(C)C(N)Oc1nc(N)ncc1N(C)CCN(C)C

Reward: 0.88  
C=CC(=O)Nc1ccc(Nc2ncoc(N3CCN(CN(O)Cn4c(-O)[nH]c(-O)c5ccccc54)C3)n2)en1

Reward: 0.87  
CN(C)CCN(CC(=O)Nc1ccccc1ncccc12)C(C(=O)[O-])c1ncccc1N(C)CCN

Reward: 0.87  
CN(C)CCOc1cc(NC(=O)C(=O)Nc2c(-O)[nH]c(-O)c3ccccc32)ccc1-c1nc(N)nc(N)n1

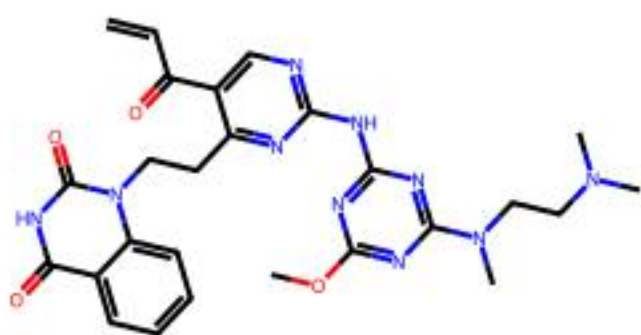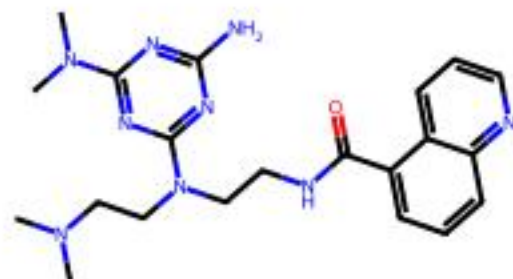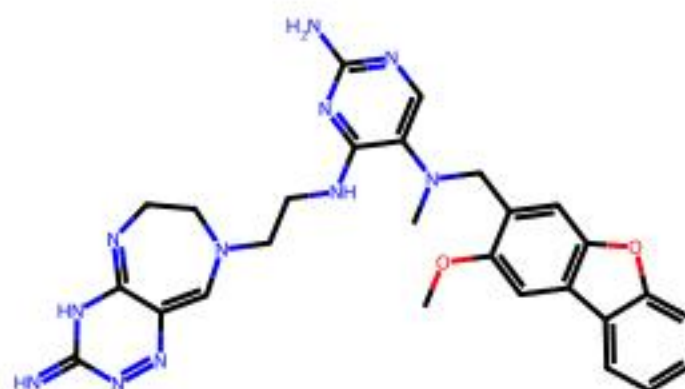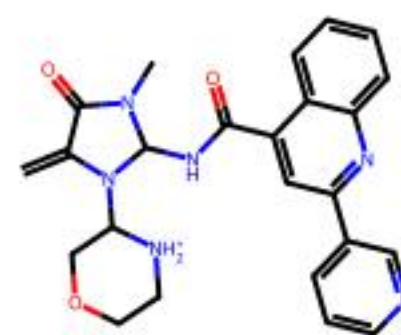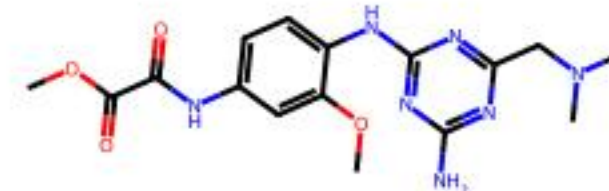

Reward: 0.87  
C=CC(=O)c1nc(Nc2nc(OC)nc(N(C)CCN(C)C)n2)nc1CCn1c(-O)[nH]c(-O)c2ccccc21

Reward: 0.85  
CN(C)CCN(CCNC(=O)c1ccccc1ncccc12)c1nc(N)nc(N(C)C)n1

Reward: 0.84  
COc1cc2c(cc1CN(C)c1nc(N)nc1NCCN1C=c3nnc(-N)[nH]c3=NCC1)oc1ccccc12

Reward: 0.84  
C=C1C(=O)N(C)C(NC(=O)c2ccc(-c3ccccc3)nc3ccccc23)N1C1COCC(NH2+)]1

Reward: 0.84  
COC(=O)C(=O)Nc1ccc(Nc2nc(N)nc(CN(C)C)n2)c(OC)c1

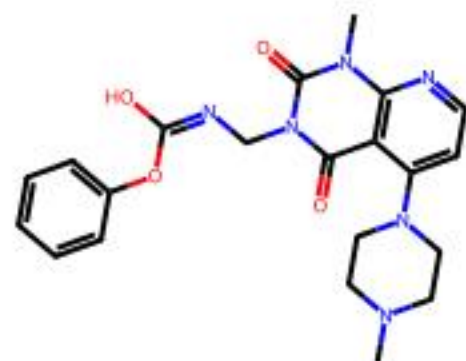

Reward: 0.83  
CN1CCN(c2ccnc3c2c(=O)n(CN=C(O)Oc2ccccc2)c(=O)n3C)CC1
