# Supplementary material
Source: ML conference proceedings conference paper supplement (https://openreview.net/forum?id=Qdu92a5DiM)
Supplement: supplementary_material [file vocab_cuda:0.pdf › ICLR/plots/tdc/perindopril_mpo/vocab_cuda:0.pdf]

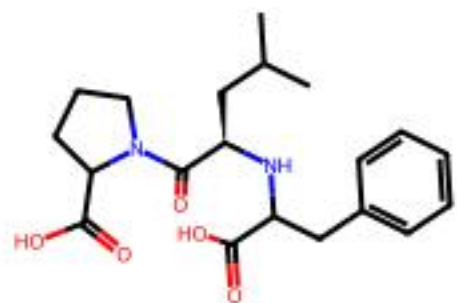

Target  
CC(C)C[C@H](C(=O)N1CCCC1C(=O)O)NC(CC2=CC=CC=C2)C(=O)O

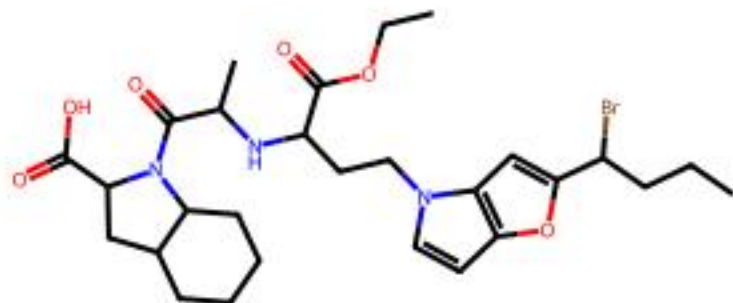

Reward: 0.81  
CCCC(Br)c1cc2c(ccn2CCC(NC(C)C(=O)N2C(C(=O)O)CC3CCCCC32)C(=O)OCC)O1

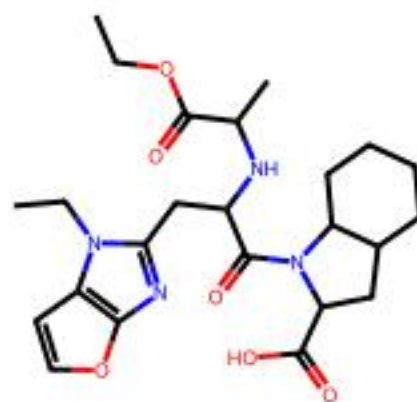

Reward: 0.78  
CCOC(=O)C(C)NC(Cc1nc2occc2n1CC)C(=O)N1C(C(=O)O)CC2CCCCC21

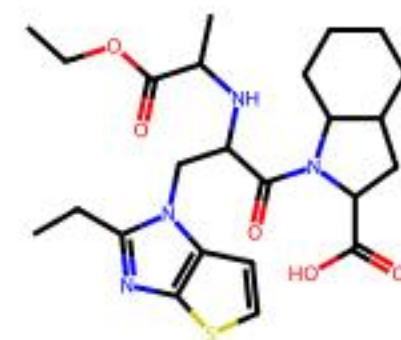

Reward: 0.78  
CCOC(=O)C(C)NC(Cn1c(CC)nc2scce21)C(=O)N1C(C(=O)O)CC2CCCCC21

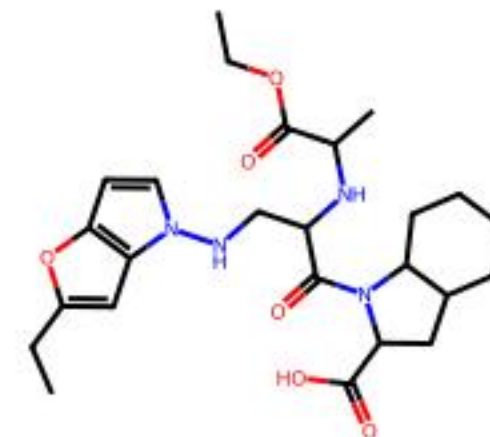

Reward: 0.77  
CCOC(=O)C(C)NC(CNn1ccc2oc(CC)cc21)C(=O)N1C(C(=O)O)CC2CCCCC21

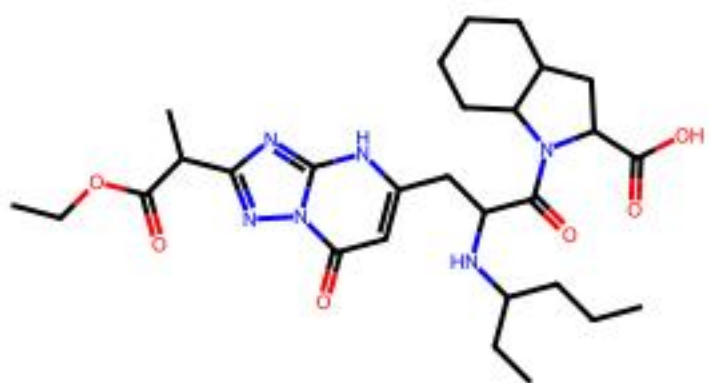

Reward: 0.74  
CCCC(CC)NC(Cc1cc(=O)n2nc(C(C)C(=O)O)OCC)nc2[nH]1)C(=O)N1C(C(=O)O)CC2CCCCC21

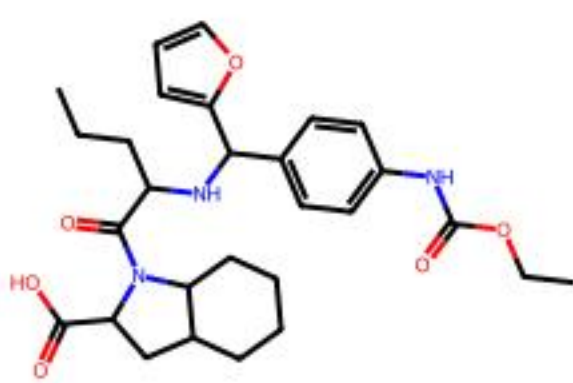

Reward: 0.73  
CCCC(NC(c1ccc(NC(=O)OCC)cc1)c1ccco1)C(=O)N1C(C(=O)O)CC2CCCCC21

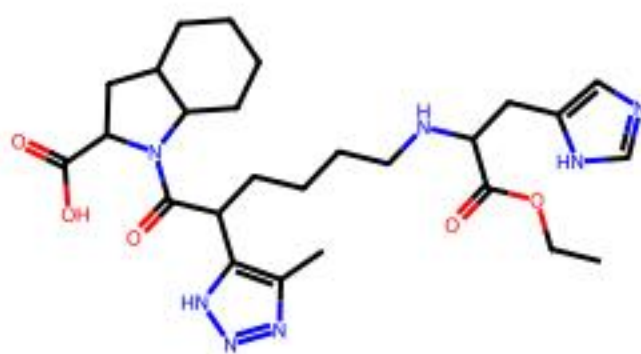

Reward: 0.70  
CCOC(=O)C(C)C(c1nc[nH]1)NCCCCC(C(=O)N1C(C(=O)O)CC2CCCCC21)c1[nH]nnc1C

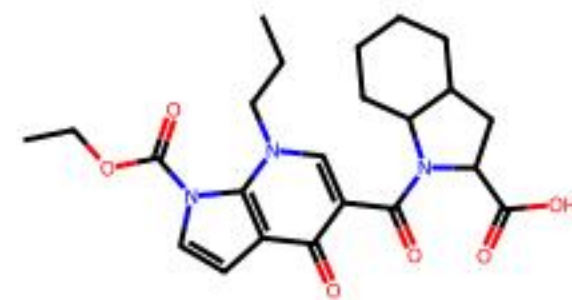

Reward: 0.68  
CCCn1cc(C(=O)N2C(C(=O)O)CC3CCCCC32)c(=O)c2ccn(C(=O)OCC)c21

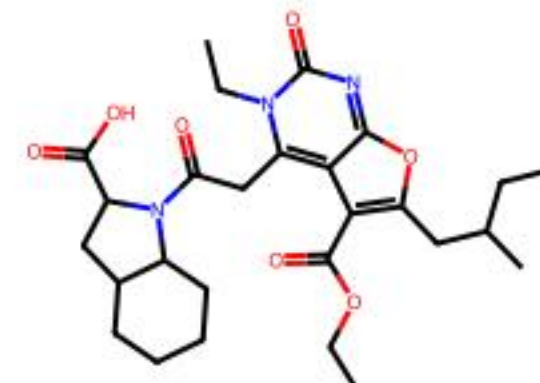

Reward: 0.66  
CCOC(=O)c1c(CC(C)CC)oc2nc(=O)n(CC)c(CC(=O)N3C(C(=O)O)CC4CCCCC43)c12

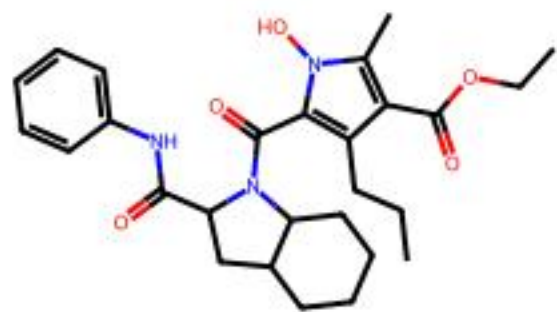

Reward: 0.64  
CCCCc1c(C(=O)OCC)c(C)n(O)c1C(=O)N1C(C(=O)O)Nc2ccccc2)CC2CCCCC21
