# Supplementary material
Source: ML conference proceedings conference paper supplement (https://openreview.net/forum?id=Qdu92a5DiM)
Supplement: supplementary_material [file vocab_cuda:0.pdf › ICLR/plots/tdc/qed/vocab_cuda:0.pdf]

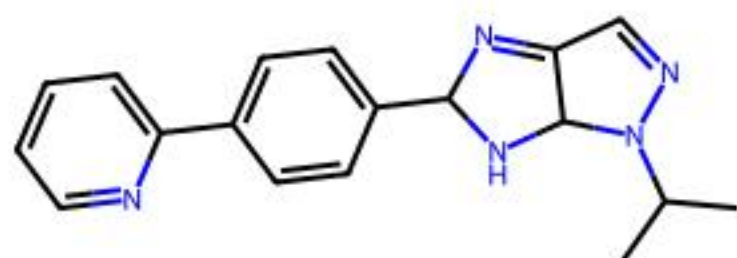

Reward: 0.95  
CC(C)N1N=CC2=NC(c3ccc(-c4cccn4)cc3)NC21

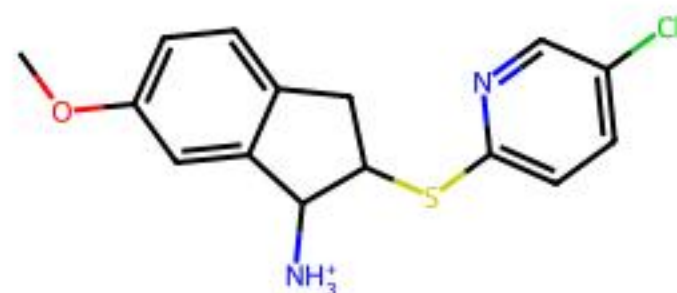

Reward: 0.95  
COc1ccc2c(c1)C([NH3+])C(Sc1ccc(Cl)cn1)C2

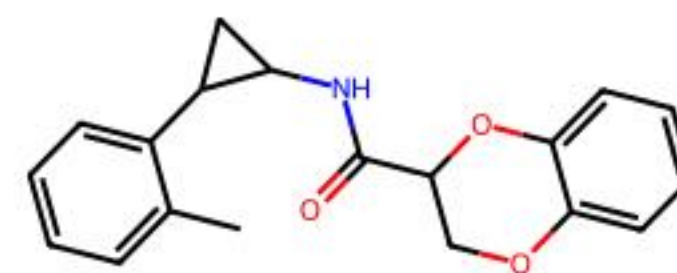

Reward: 0.95  
Cc1ccccc1C1CC1NC(=O)C1COc2ccccc2O1

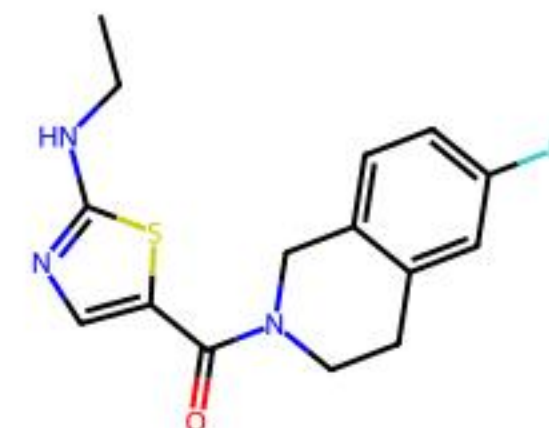

Reward: 0.95  
CCNc1ncc(C(=O)N2CCc3cc(F)ccc3C2)s1

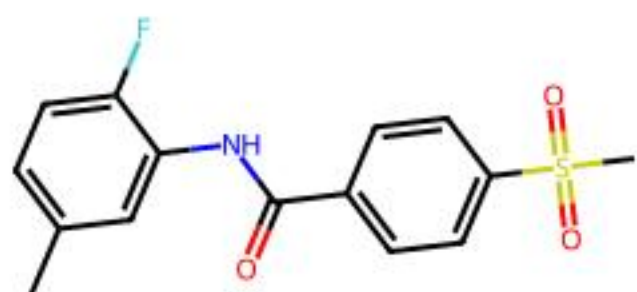

Reward: 0.95  
Cc1ccc(F)c(NC(=O)c2ccc(S(=O)(=O)C)cc2)c1

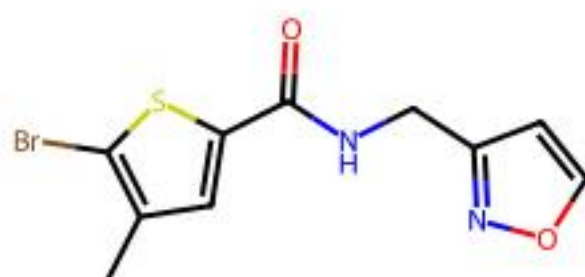

Reward: 0.95  
Cc1cc(C(=O)NCc2con2)sc1Br

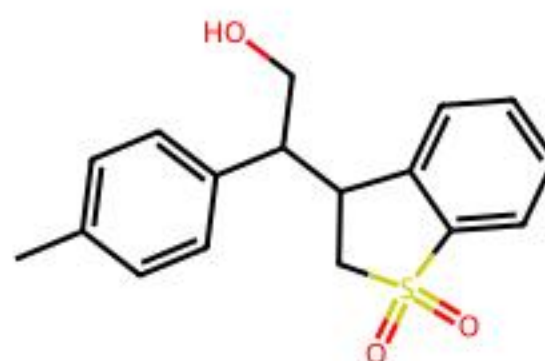

Reward: 0.95  
Cc1ccc(C(CO)C2CS(=O)(=O)c3ccccc32)cc1

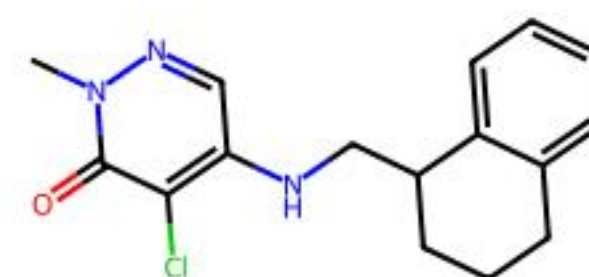

Reward: 0.95  
Cn1ncc(NCC2CCCc3ccccc32)c(Cl)c1=O

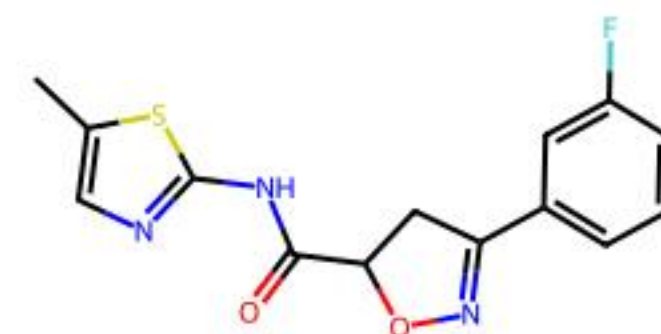

Reward: 0.95  
Cc1cnc(NC(=O)C2CC(c3ccccc3F)c3)=NO2)s1

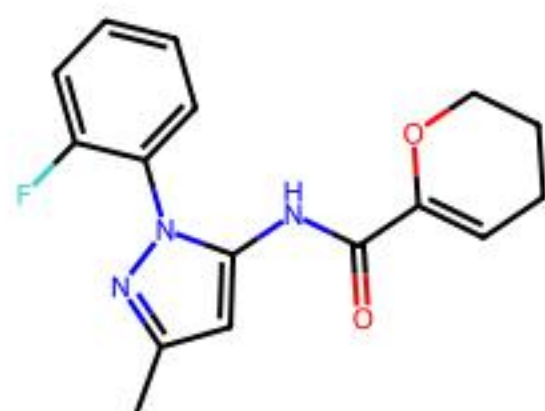

Reward: 0.95  
Cc1cc(NC(=O)C2=CCCCO2)n(-c2ccccc2F)n1
