# Supplementary material
Source: ML conference proceedings conference paper supplement (https://openreview.net/forum?id=Qdu92a5DiM)
Supplement: supplementary_material [file vocab_cuda:0.pdf › ICLR/plots/tdc/ranolazine_mpo/vocab_cuda:0.pdf]

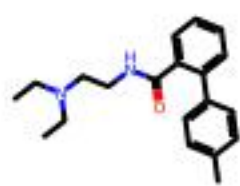

Target  
CC1=CC=C(C=C1)C2=CC=CC=C2C(=O)NCCN(CC)CC

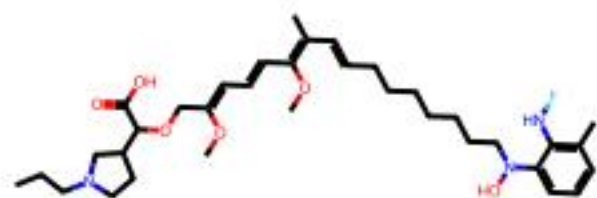

Reward: 0.89  
CCCN1CCC(C)OCC(=CC=CC(OC)=C(C)C=CCCCCNC1O)c2ccccc2c2NF(OC)C(=O)O)C1

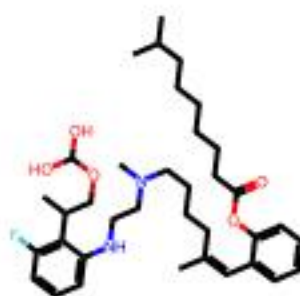

Reward: 0.86  
CC(=Cc1ccccc1OC(=O)CCCCCCC(C)C)CCCCN(C)CCNc1ccccc1F)c1C(C)COC(O)O

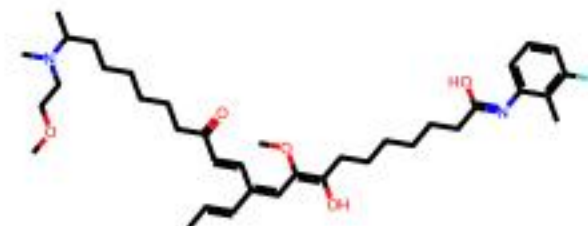

Reward: 0.86  
CC=CC(C=CC(=O)CCCCCCC(C)N(C)C(COC)=CC(OC)=C(O)CCCCCCC(O)=Nc1ccccc1F)c1C

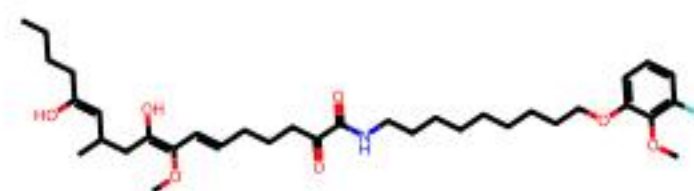

Reward: 0.85  
CCCCC(O)=CC(C)CC(O)=C(C=CCCC(=O)C(=O)NCCCCCCCCCOCc1ccccc1F)c1OC)OC

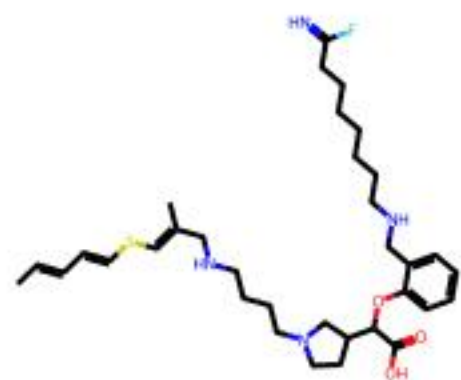

Reward: 0.85  
CC=CC=CSC=C(C)CNCCCCN1CCC(C)Oc2ccccc2CNCCCCCCCC(=N)F)C(=O)O)C1

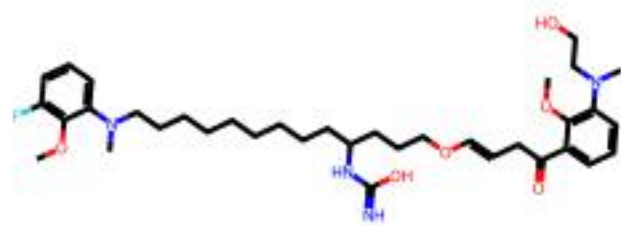

Reward: 0.85  
COc1c(F)cccc1N(C)CCCCCCCCC(CCCOC=CCC(=O)c1ccccc1N(C)CCO)c1OC)N(C)=N)O

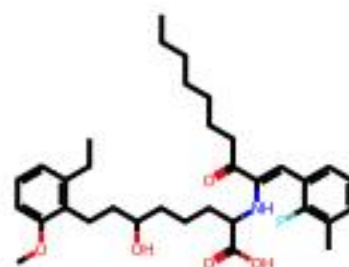

Reward: 0.85  
CCCCCCCC(=O)C(=Cc1ccccc1C=IF)N(C)CCCC(O)CCc1c(CC)cccc1OC)C(=O)O

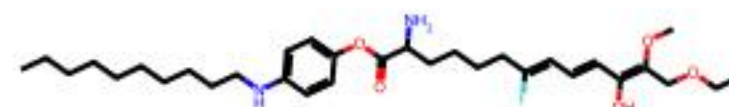

Reward: 0.83  
CCCCCCCCCNc1ccc(OC(=O)C(N)CCCC(F)=CC=CC(O)=C(COCC)OC)cc1

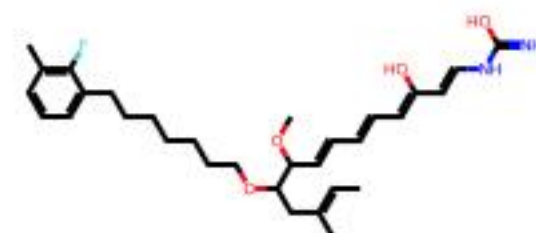

Reward: 0.83  
CC=C(C)CC(OCCCCCCCCc1ccccc1C1F)C(C=CC=CC(O)C=CNC(=N)O)OC

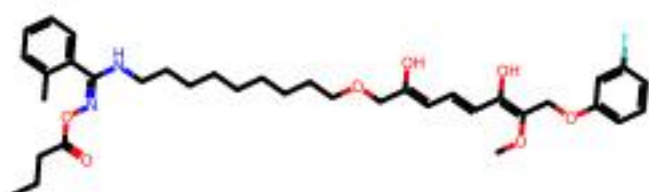

Reward: 0.83  
CCCC(=O)ON=C(NCCCCCCCCCOCC(O)=CC=CC(O)=C(COc1ccccc1F)c1OC)c1ccccc1C
