# Supplementary material
Source: ML conference proceedings conference paper supplement (https://openreview.net/forum?id=Qdu92a5DiM)
Supplement: supplementary_material [file vocab_cuda:0.pdf › ICLR/plots/tdc/scaffold_hop/vocab_cuda:0.pdf]

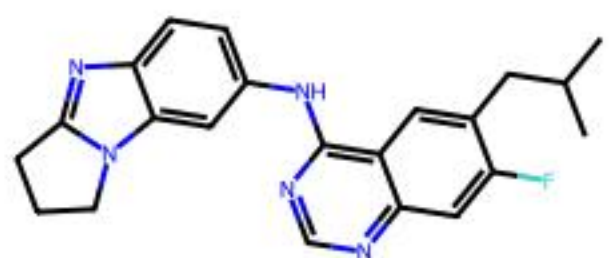

Reward: 0.67  
CC(C)Cc1cc2c(Nc3ccc4nc5n(c4c3)CCC5)ncnc2cc1F

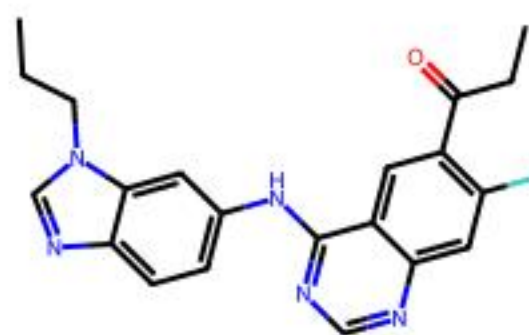

Reward: 0.67  
CCCN1cnc2ccc(Nc3ncnc4cc(F)c(C(=O)CC)cc34)cc21

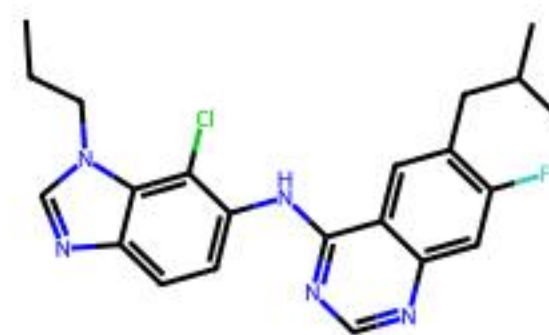

Reward: 0.67  
CCCN1cnc2ccc(Nc3ncnc4cc(F)c(CC(C)C)cc34)c(Cl)c21

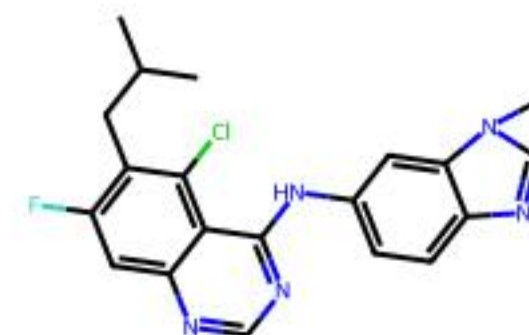

Reward: 0.67  
CC(C)Cc1c(F)cc2ncnc(Nc3ccc4nc5n(c4c3)C5)c2c1Cl

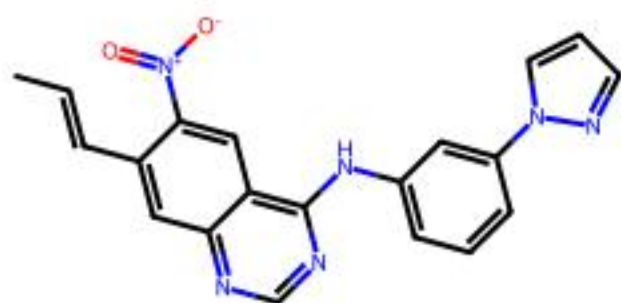

Reward: 0.65  
CC=Cc1cc2ncnc(Nc3ccc(-n4cccn4)c3)c2cc1[N+](=O)[O-]

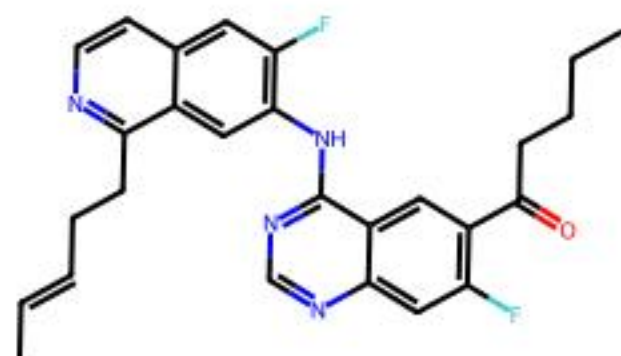

Reward: 0.64  
CC=CCc1nccc2cc(F)c(Nc3ncnc4cc(F)c(C(=O)CCCC)cc34)cc12

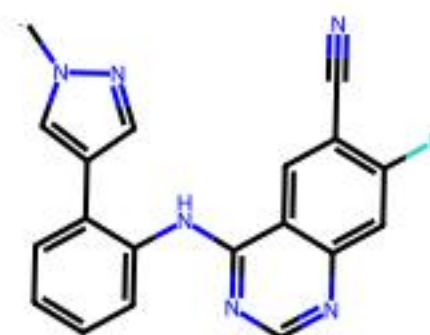

Reward: 0.61  
[CH2]n1cc(-c2ccccc2Nc2ncnc3cc(F)c(C#N)cc23)cn1

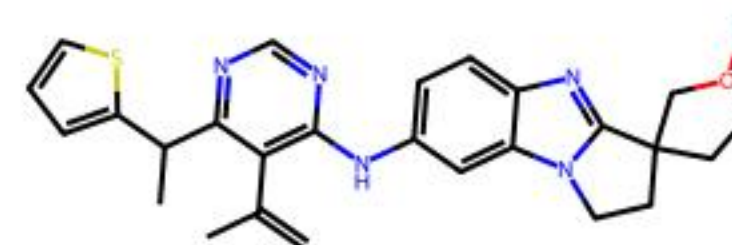

Reward: 0.58  
C=C(C)c1c(Nc2ccc3nc4n(c3c2)CCC4(CC)COF)ncnc1C(C)c1cccs1

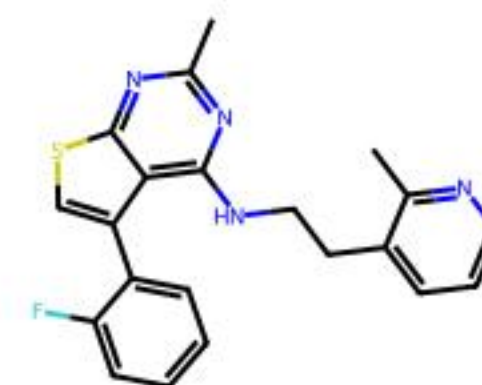

Reward: 0.57  
Cc1nc(NCCc2cccn2C)c2c(-c3ccccc3F)csc2n1

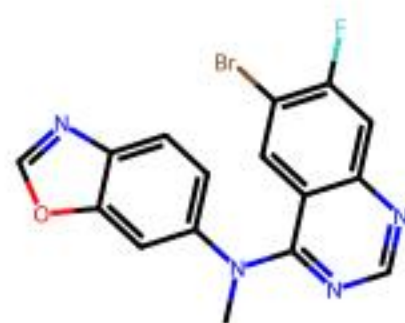

Reward: 0.56  
CN(c1ccc2ncoc2c1)c1ncnc2cc(F)c(Br)cc12
