# Supplementary material
Source: ML conference proceedings conference paper supplement (https://openreview.net/forum?id=Qdu92a5DiM)
Supplement: supplementary_material [file vocab_cuda:0.pdf › ICLR/plots/tdc/thiothixene_rediscovery/vocab_cuda:0.pdf]

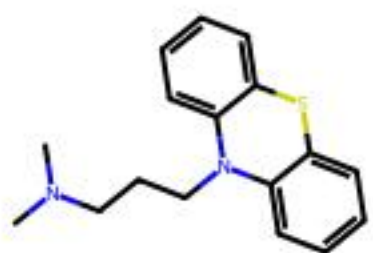

Target  
CN(C)CCCN1C2=CC=CC=C2SC3=CC=CC=C13

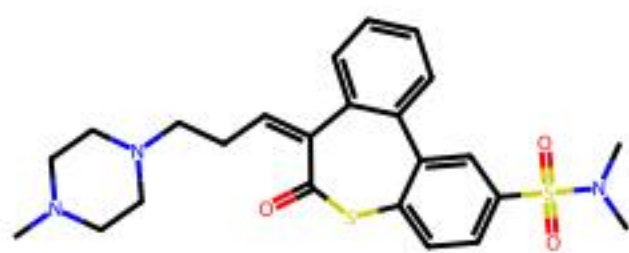

Reward: 0.80  
CN1CCN(CCC=C2C(=O)Sc3ccc(S(=O)(=O)N(C)C)cc3-c3ccccc32)CC1

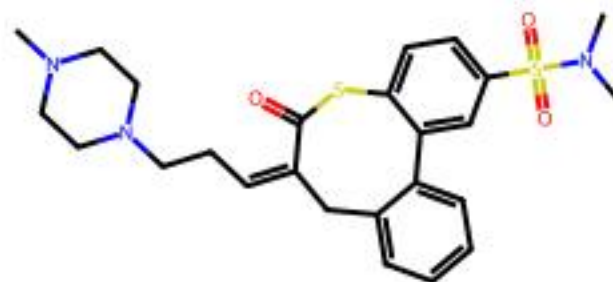

Reward: 0.75  
CN1CCN(CCC=C2Cc3ccccc3-c3cc(S(=O)(=O)N(C)C)ccc3SC2=O)CC1

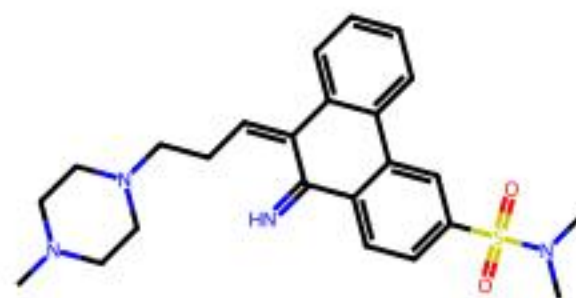

Reward: 0.74  
CN1CCN(CCC=C2C(=N)c3ccc(S(=O)(=O)N(C)C)cc3-c3ccccc32)CC1

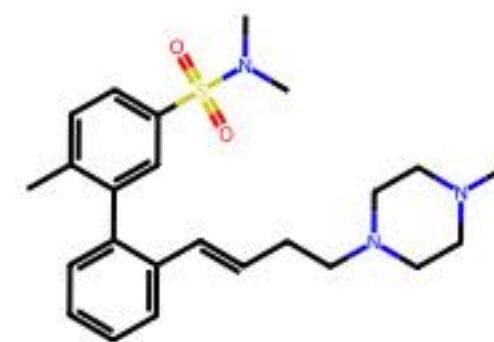

Reward: 0.67  
Cc1ccc(S(=O)(=O)N(C)C)cc1-c1ccccc1C=CCCN1CCN(C)CC1

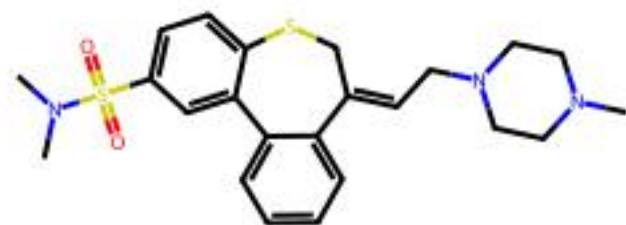

Reward: 0.67  
CN1CCN(CC=C2CSc3ccc(S(=O)(=O)N(C)C)cc3-c3ccccc32)CC1

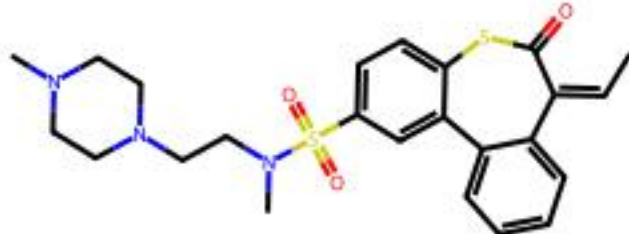

Reward: 0.65  
CC=C1C(=O)Sc2ccc(S(=O)(=O)N(C)CCN3CCN(C)CC3)cc2-c2ccccc21

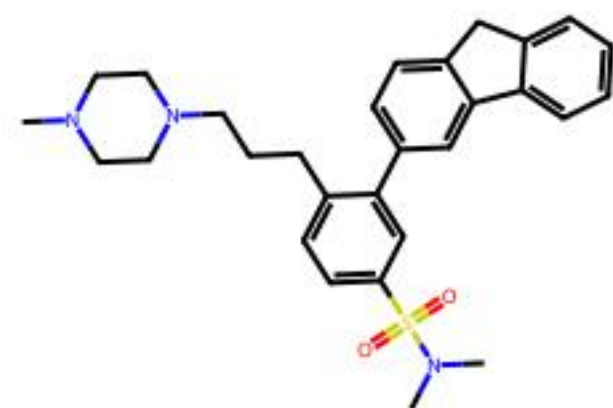

Reward: 0.55  
CN1CCN(CCCc2ccc(S(=O)(=O)N(C)C)cc2-c2ccc3c(c2)-c2ccccc2C3)CC1

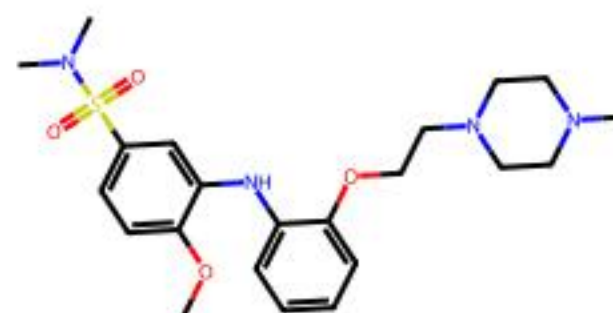

Reward: 0.55  
COc1ccc(S(=O)(=O)N(C)C)cc1Nc1ccccc1OCCN1CCN(C)CC1

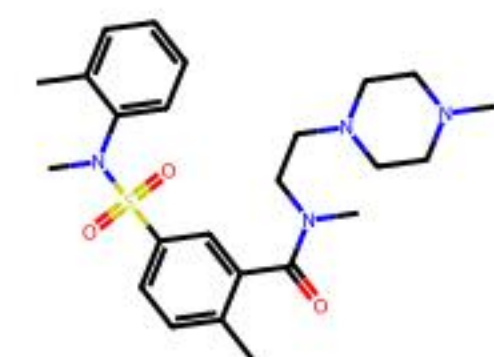

Reward: 0.50  
Cc1ccc(S(=O)(=O)N(C)C)cc1C(=O)N(C)CCN1CCN(C)CC1

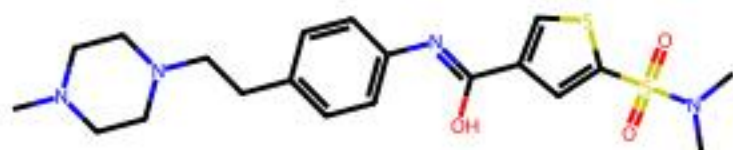

Reward: 0.46  
CN1CCN(CCCc2ccc(N=C(O)c3csc(S(=O)(=O)N(C)C)c3)cc2)CC1
