# Supplementary material
Source: ML conference proceedings conference paper supplement (https://openreview.net/forum?id=Qdu92a5DiM)
Supplement: supplementary_material [file vocab_cuda:0.pdf › ICLR/plots/tdc/troglitazone_rediscovery/vocab_cuda:0.pdf]

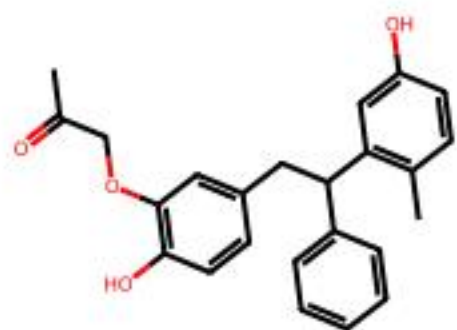

Target  
CC1=C(C=C(C=C1)O)C(CC2=CC(=C(C=C2)O)OCC(=O)C)C3=CC=CC=C3

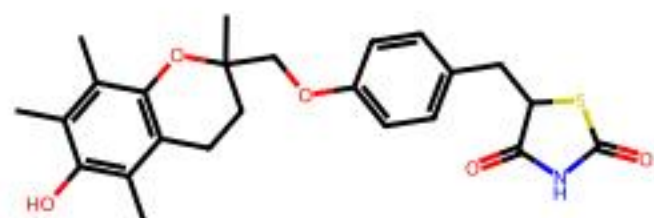

Reward: 1.00  
Cc1c(C)c2c(c(C)c1O)CCC(C)(COC1ccc(CC3SC(=O)NC3=O)cc1)O2

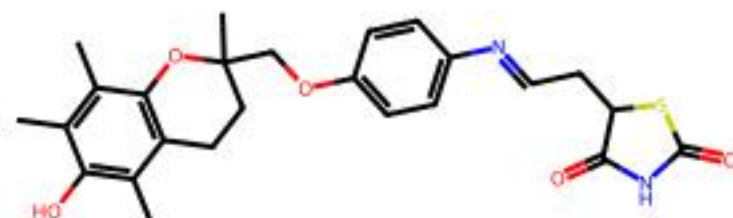

Reward: 0.80  
Cc1c(C)c2c(c(C)c1O)CCC(C)(COC1ccc(N=CCC3SC(=O)NC3=O)cc1)O2

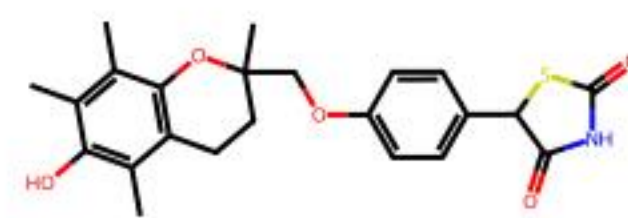

Reward: 0.80  
Cc1c(C)c2c(c(C)c1O)CCC(C)(COC1ccc(C3SC(=O)NC3=O)cc1)O2

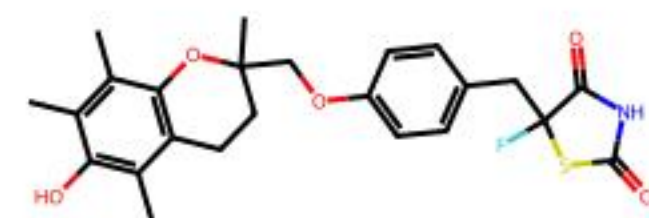

Reward: 0.74  
Cc1c(C)c2c(c(C)c1O)CCC(C)(COC1ccc(CC3(F)SC(=O)NC3=O)cc1)O2

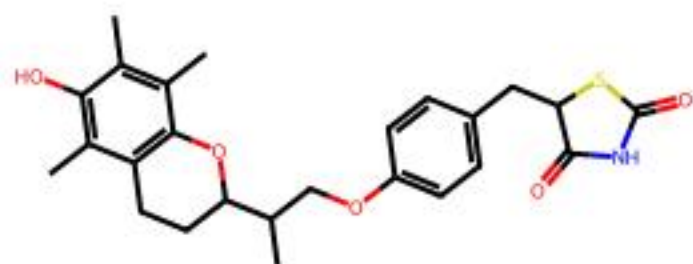

Reward: 0.72  
Cc1c(C)c2c(c(C)c1O)CCC(C)(COC1ccc(CC3SC(=O)NC3=O)cc1)O2

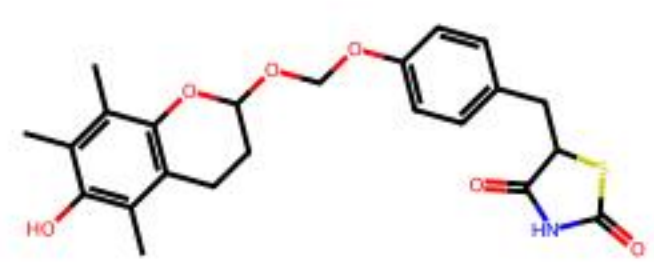

Reward: 0.71  
Cc1c(C)c2c(c(C)c1O)CCC(OCO1ccc(CC3SC(=O)NC3=O)cc1)O2

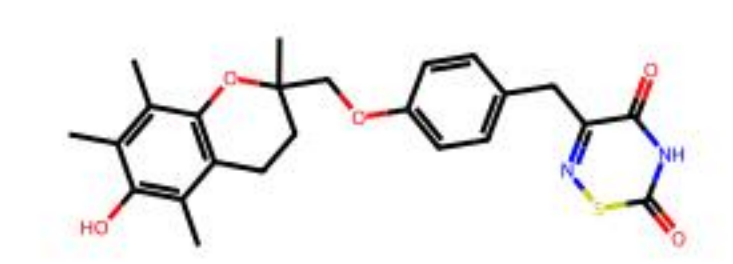

Reward: 0.70  
Cc1c(C)c2c(c(C)c1O)CCC(C)(COC1ccc(Cc3nsc(=O)[nH]c3=O)cc1)O2

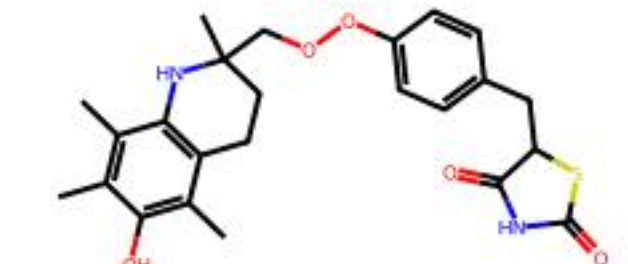

Reward: 0.70  
Cc1c(C)c2c(c(C)c1O)CCC(C)(COO1ccc(CC3SC(=O)NC3=O)cc1)N2

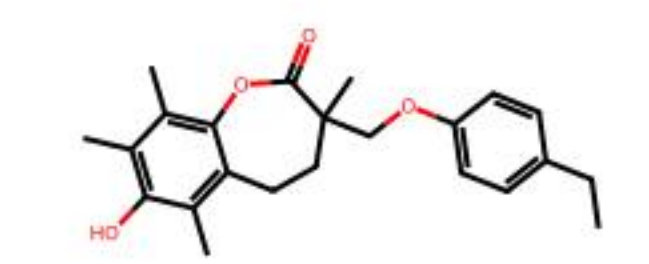

Reward: 0.60  
CCc1ccc(OCC2(C)CCc3c(C)c(O)c(C)c(C)c3OC2=O)cc1

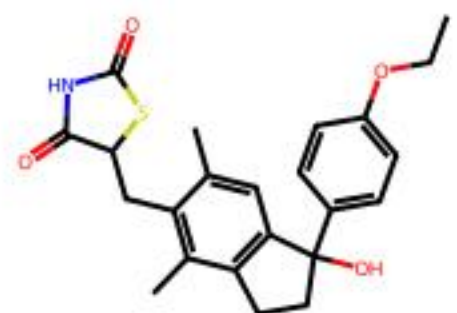

Reward: 0.52  
CCOc1ccc(C2(O)CCc3c2cc(C)c(CC2SC(=O)NC2=O)c3C)cc1
