# Supplementary material
Source: ML conference proceedings conference paper supplement (https://openreview.net/forum?id=Qdu92a5DiM)
Supplement: supplementary_material [file vocab_cuda:0.pdf › ICLR/plots/tdc/valsartan_smarts/vocab_cuda:0.pdf]

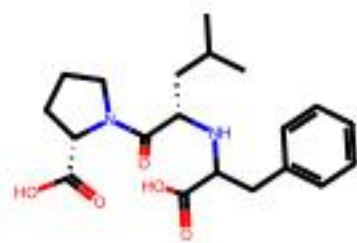

Target  
CC(C)[C@H](C(=O)N1CCC[C@H]1C(=O)O)NC(Cc2ccccc2)C(=O)O

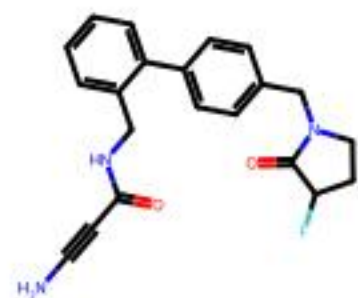

Reward: 0.98  
NC#CC(=O)NCc1ccccc1-c1ccc(CN2CCC(F)C2=O)cc1

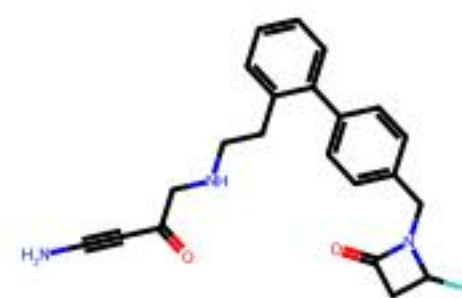

Reward: 0.94  
NC#CC(=O)CNCCc1ccccc1-c1ccc(CN2C(=O)CC2F)cc1

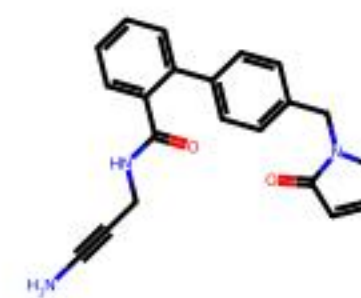

Reward: 0.94  
NC#CCNC(=O)c1ccccc1-c1ccc(CN2CC=CC2=O)cc1

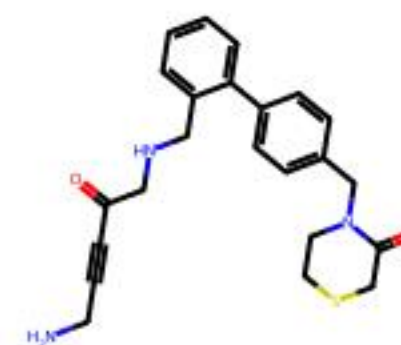

Reward: 0.93  
NCC#CC(=O)CNCCc1ccccc1-c1ccc(CN2CCSCC2=O)cc1

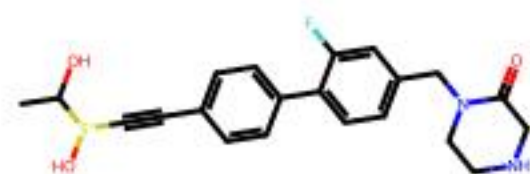

Reward: 0.84  
CC(O)[S+](O)C#Cc1ccc(-c2ccc(CN3CCNCC3=O)cc2F)cc1

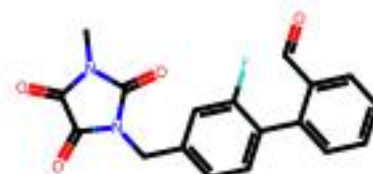

Reward: 0.83  
CN1C(=O)C(=O)N(Cc2ccc(-c3ccccc3C=O)c(F)c2)C1=O

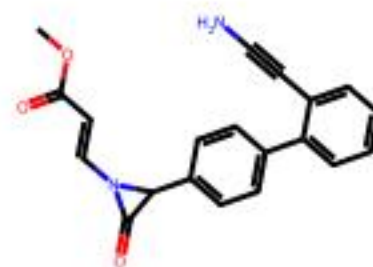

Reward: 0.81  
COC(=O)C=CN1C(=O)C1c1ccc(-c2ccccc2C#CN)cc1

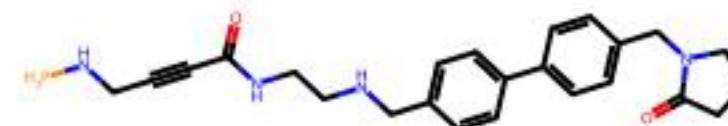

Reward: 0.77  
O=C(C#CCNP)NCCNCc1ccc(-c2ccc(CN3CCCC3=O)cc2)cc1

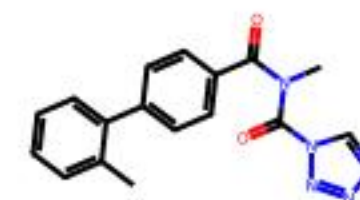

Reward: 0.55  
Cc1ccccc1-c1ccc(C(=O)N(C)C(=O)n2cnnn2)cc1

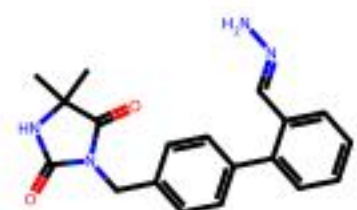

Reward: 0.19  
CC1(C)NC(=O)N(Cc2ccc(-c3ccccc3C=NN)cc2)C1=O
