# Supplementary material
Source: ML conference proceedings conference paper supplement (https://openreview.net/forum?id=Qdu92a5DiM)
Supplement: supplementary_material [file vocab_cuda:0.pdf › ICLR/plots/tdc/zaleplon_mpo/vocab_cuda:0.pdf]

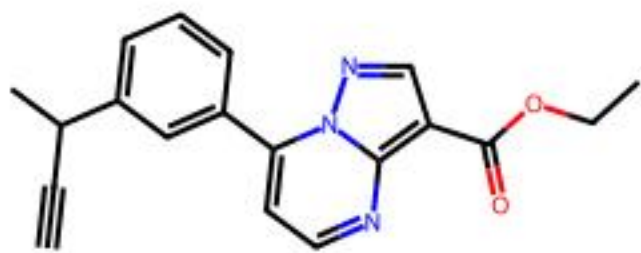

Reward: 0.72  
C#CC(C)c1cccc(-c2ccnc3c(C(=O)OCC)cnn23)c1

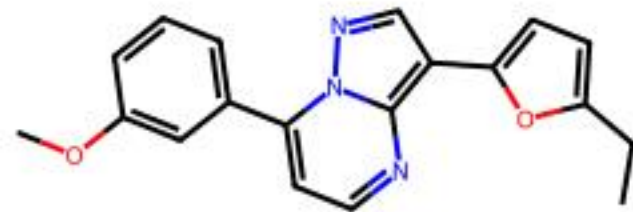

Reward: 0.66  
CCc1ccc(-c2cnn3c(-c4cccc(OC)c4)ccnc23)o1

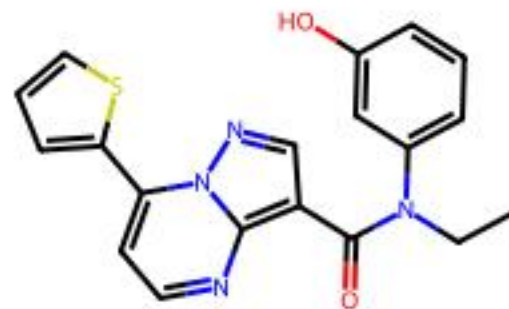

Reward: 0.63  
CCN(C(=O)c1cnn2c(-c3cccs3)ccnc12)c1cccc(O)c1

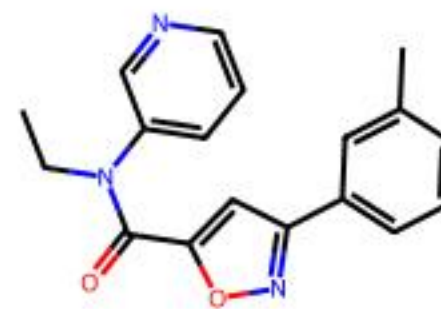

Reward: 0.59  
CCN(C(=O)c1cc(-c2cccc(C)c2)no1)c1cccnc1

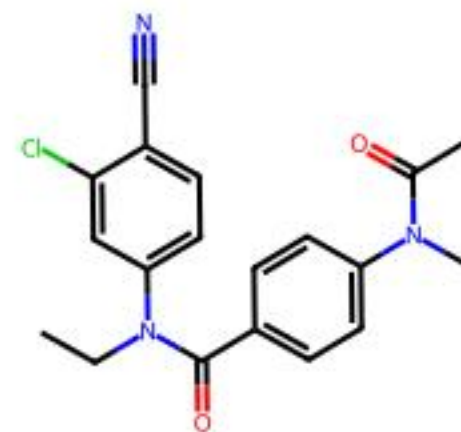

Reward: 0.56  
CCN(C(=O)c1ccc(N(C)C(C)=O)cc1)c1ccc(C#N)c(Cl)c1

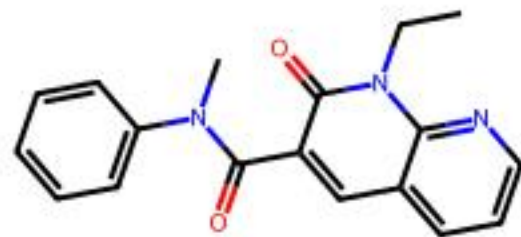

Reward: 0.55  
CCn1c(=O)c(C(=O)N(C)c2ccccc2)cc2cccnc21

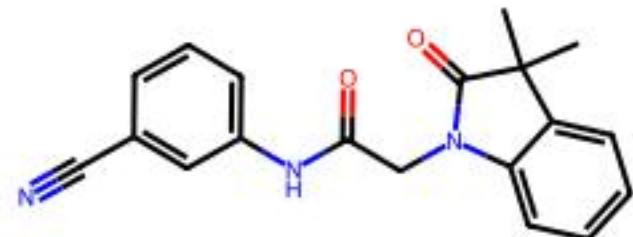

Reward: 0.53  
CC1(C)C(=O)N(CC(=O)Nc2cccc(C#N)c2)c2ccccc21

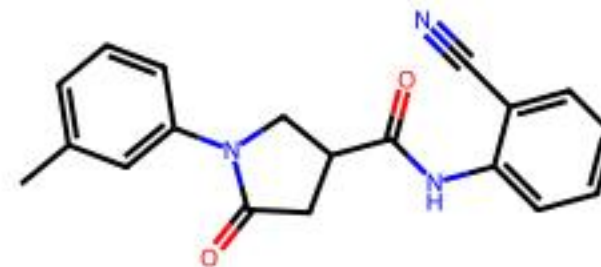

Reward: 0.53  
Cc1cccc(N2CC(C(=O)Nc3ccccc3C#N)CC2=O)c1

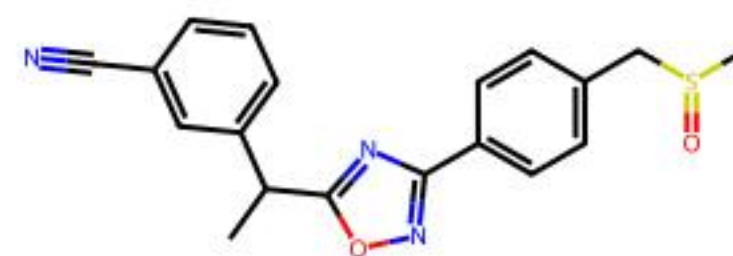

Reward: 0.51  
CC(c1cccc(C#N)c1)c1nc(-c2ccc(CS(C)=O)cc2)no1

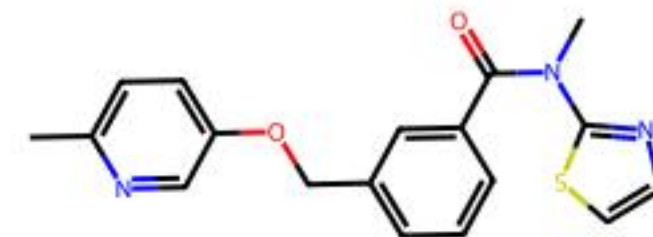

Reward: 0.51  
Cc1ccc(OCc2cccc(C(=O)N(C)c3nccs3)c2)cn1
