# Supplementary material
Source: ML conference proceedings conference paper supplement (https://openreview.net/forum?id=Qdu92a5DiM)

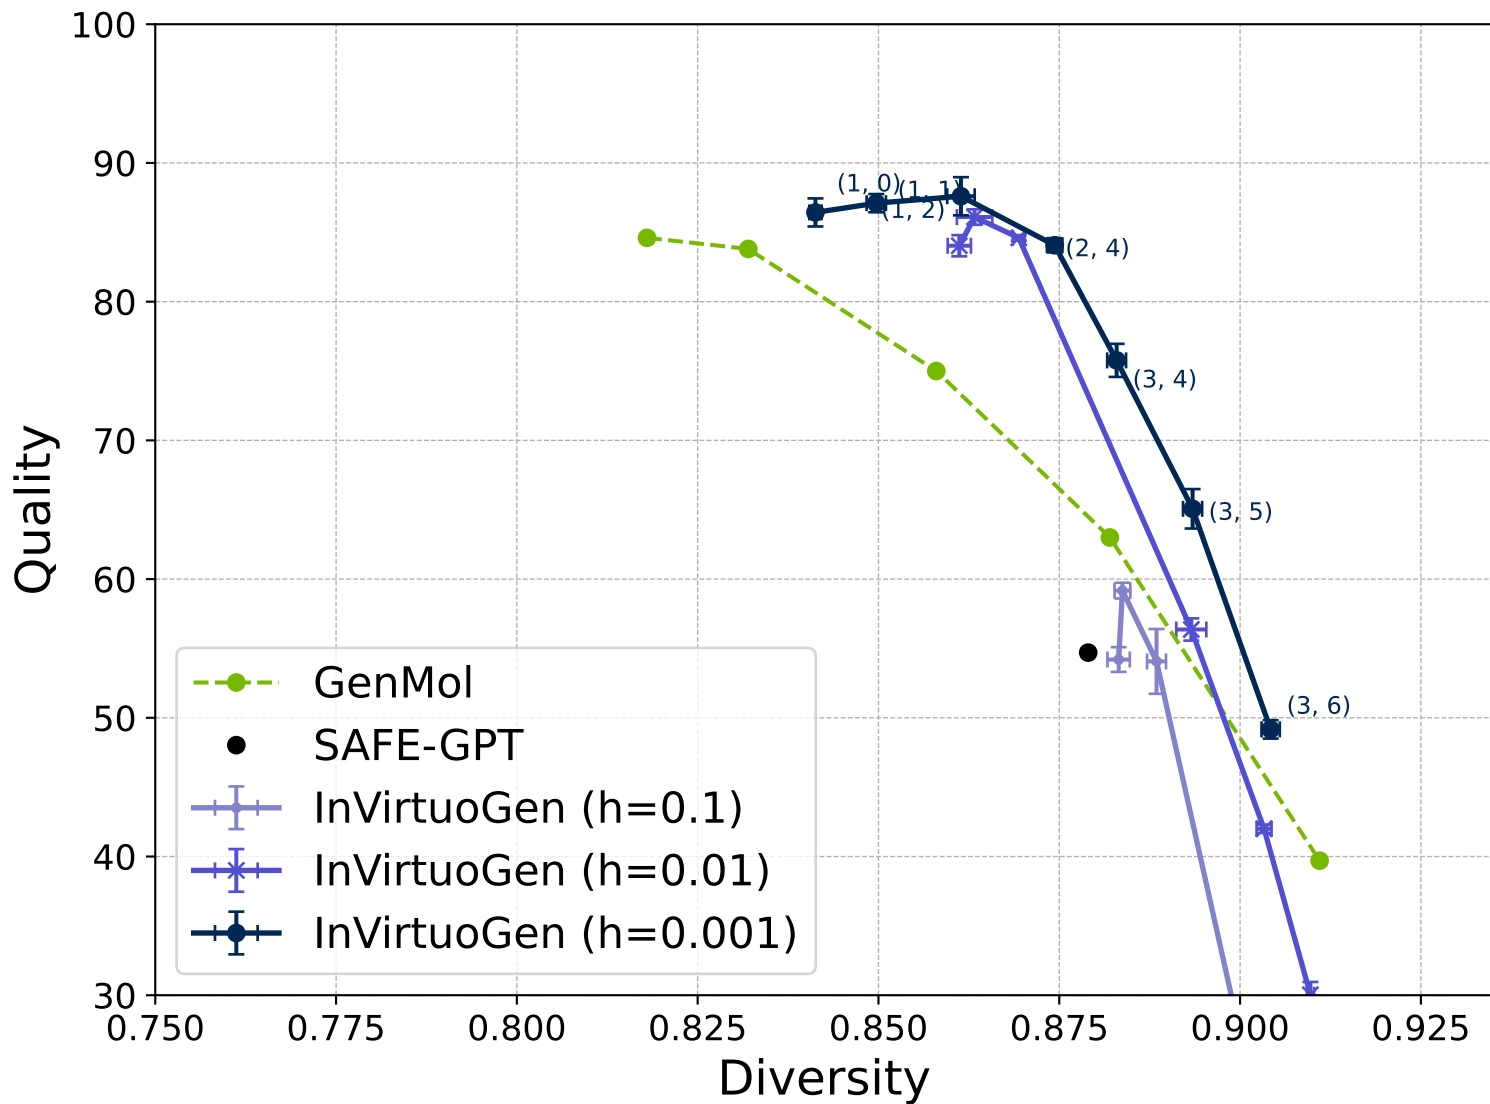

Supplement: supplementary_material [file quality_vs_diversity_dt_scan.pdf › ICLR/plots/denovo/quality_vs_diversity_dt_scan.pdf]

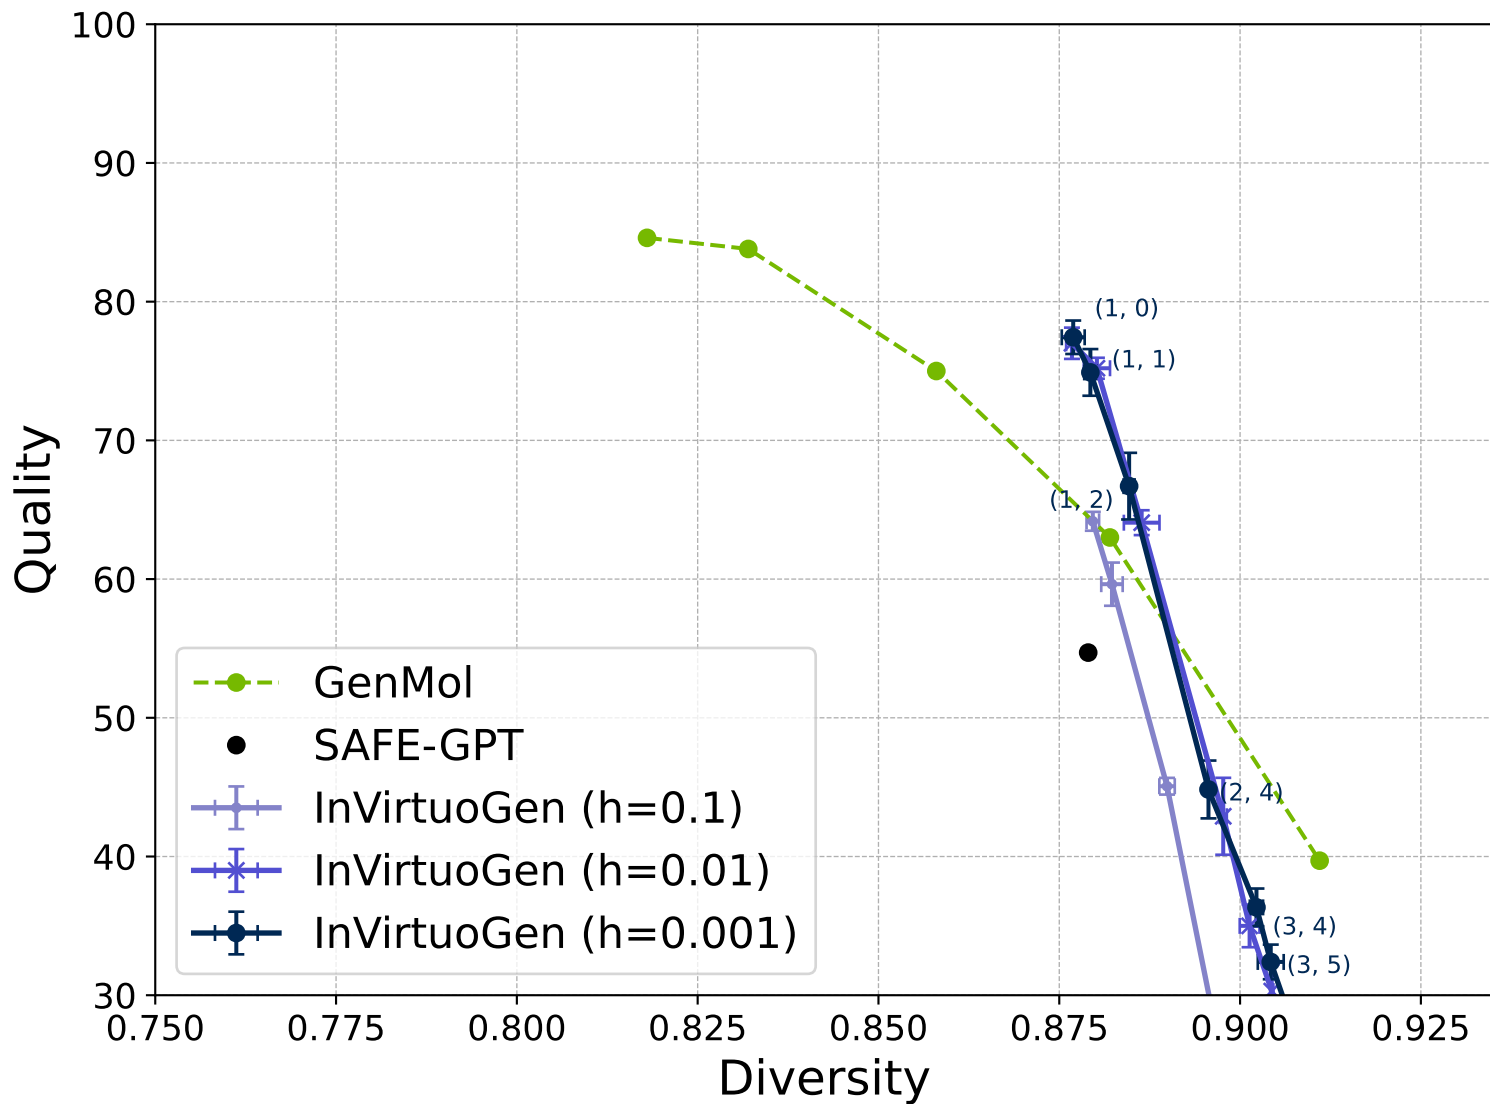

Supplement: supplementary_material [file quality_vs_diversity_dt_scan_eta_1.pdf › ICLR/plots/denovo/quality_vs_diversity_dt_scan_eta_1.pdf]

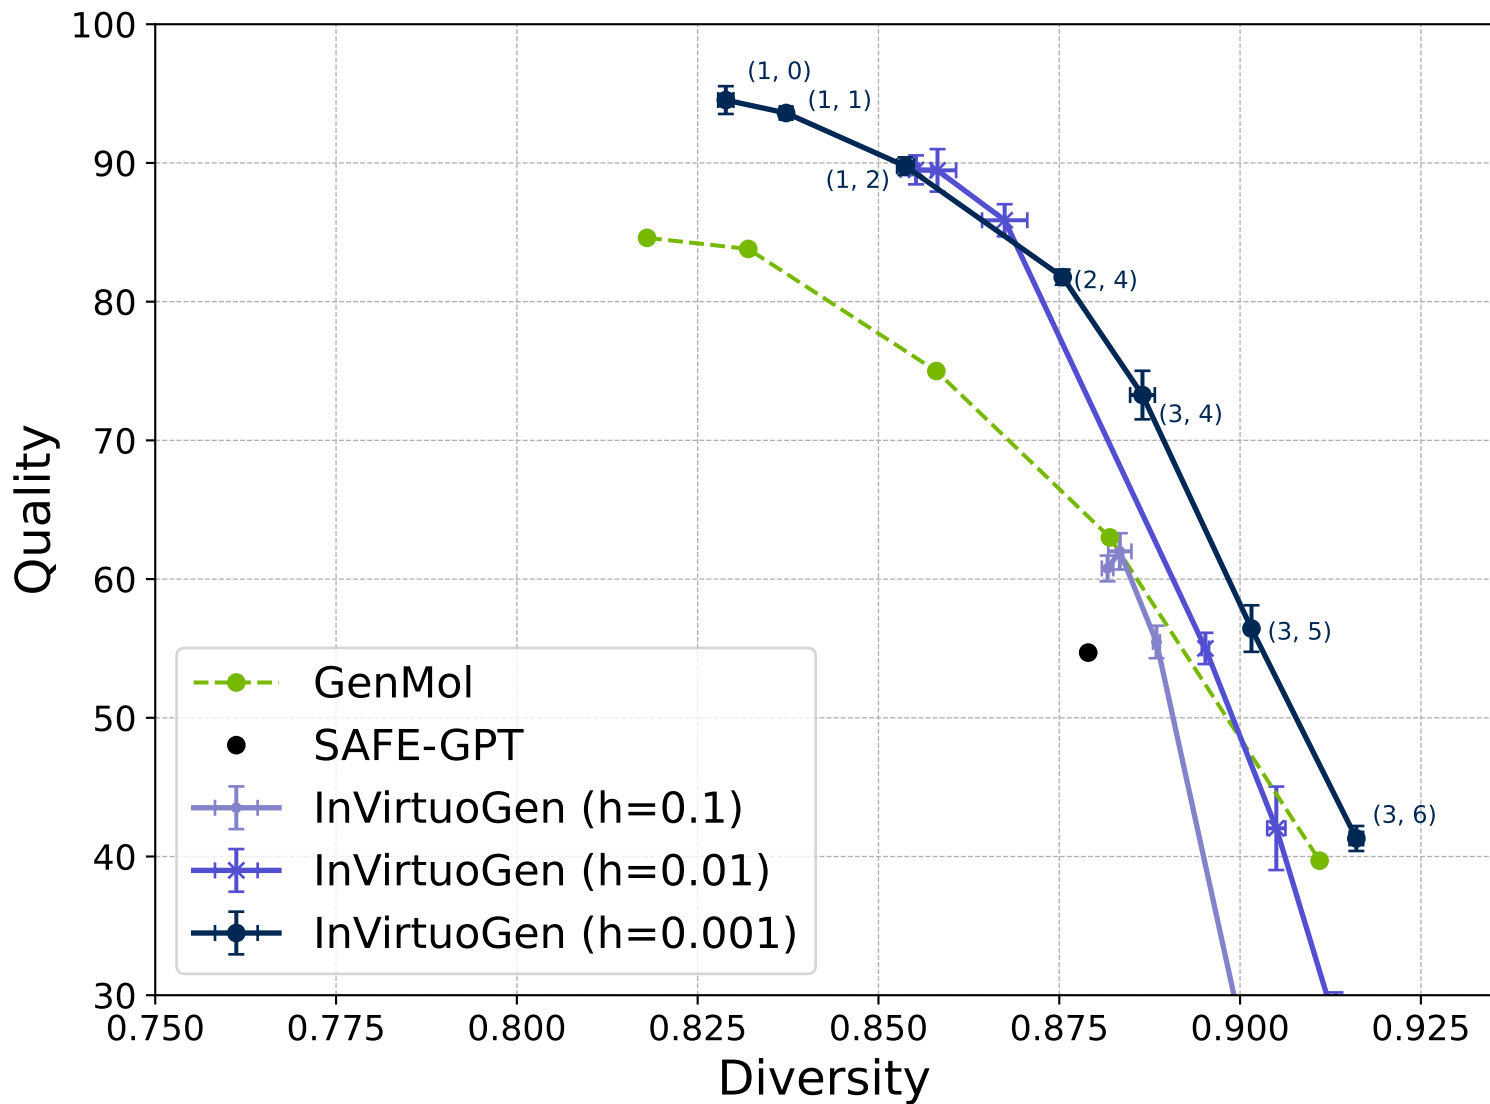

Supplement: supplementary_material [file quality_vs_diversity_eta_999.0.pdf › ICLR/plots/denovo/quality_vs_diversity_eta_999.0.pdf]

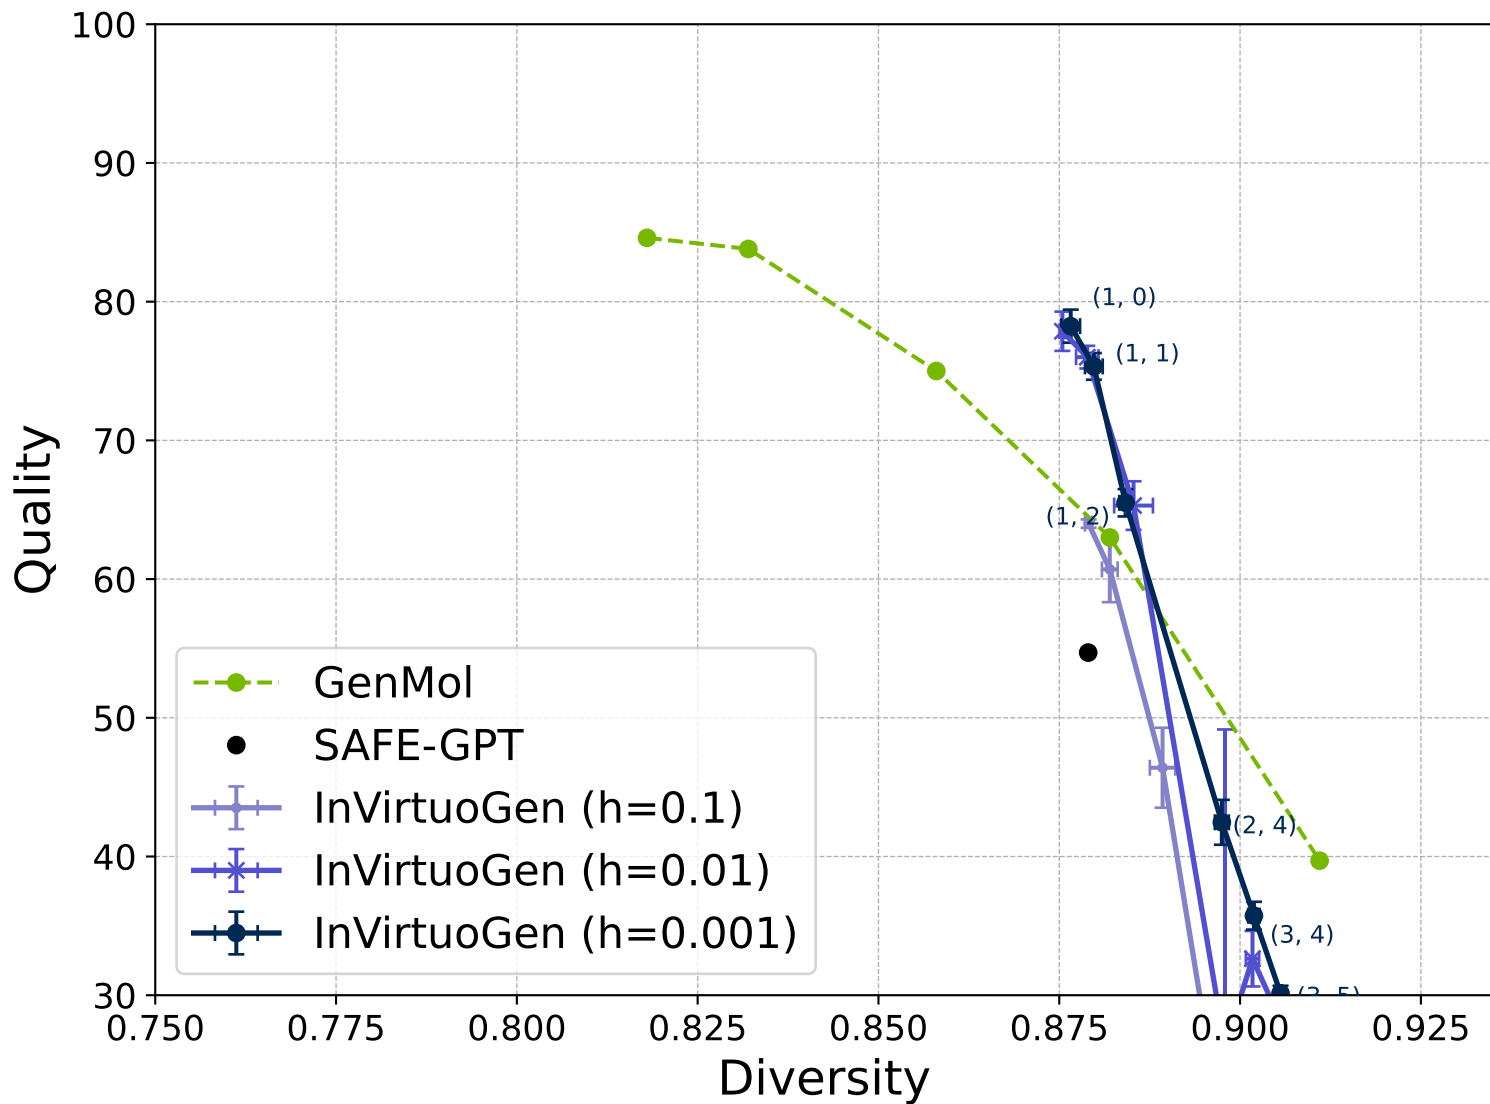

Supplement: supplementary_material [file quality_vs_diversity_no_timeweight_1.0.pdf › ICLR/plots/denovo/quality_vs_diversity_no_timeweight_1.0.pdf]



Supplement: supplementary_material [file quality_vs_diversity_no_timeweight_999.0.pdf › ICLR/plots/denovo/quality_vs_diversity_no_timeweight_999.0.pdf]

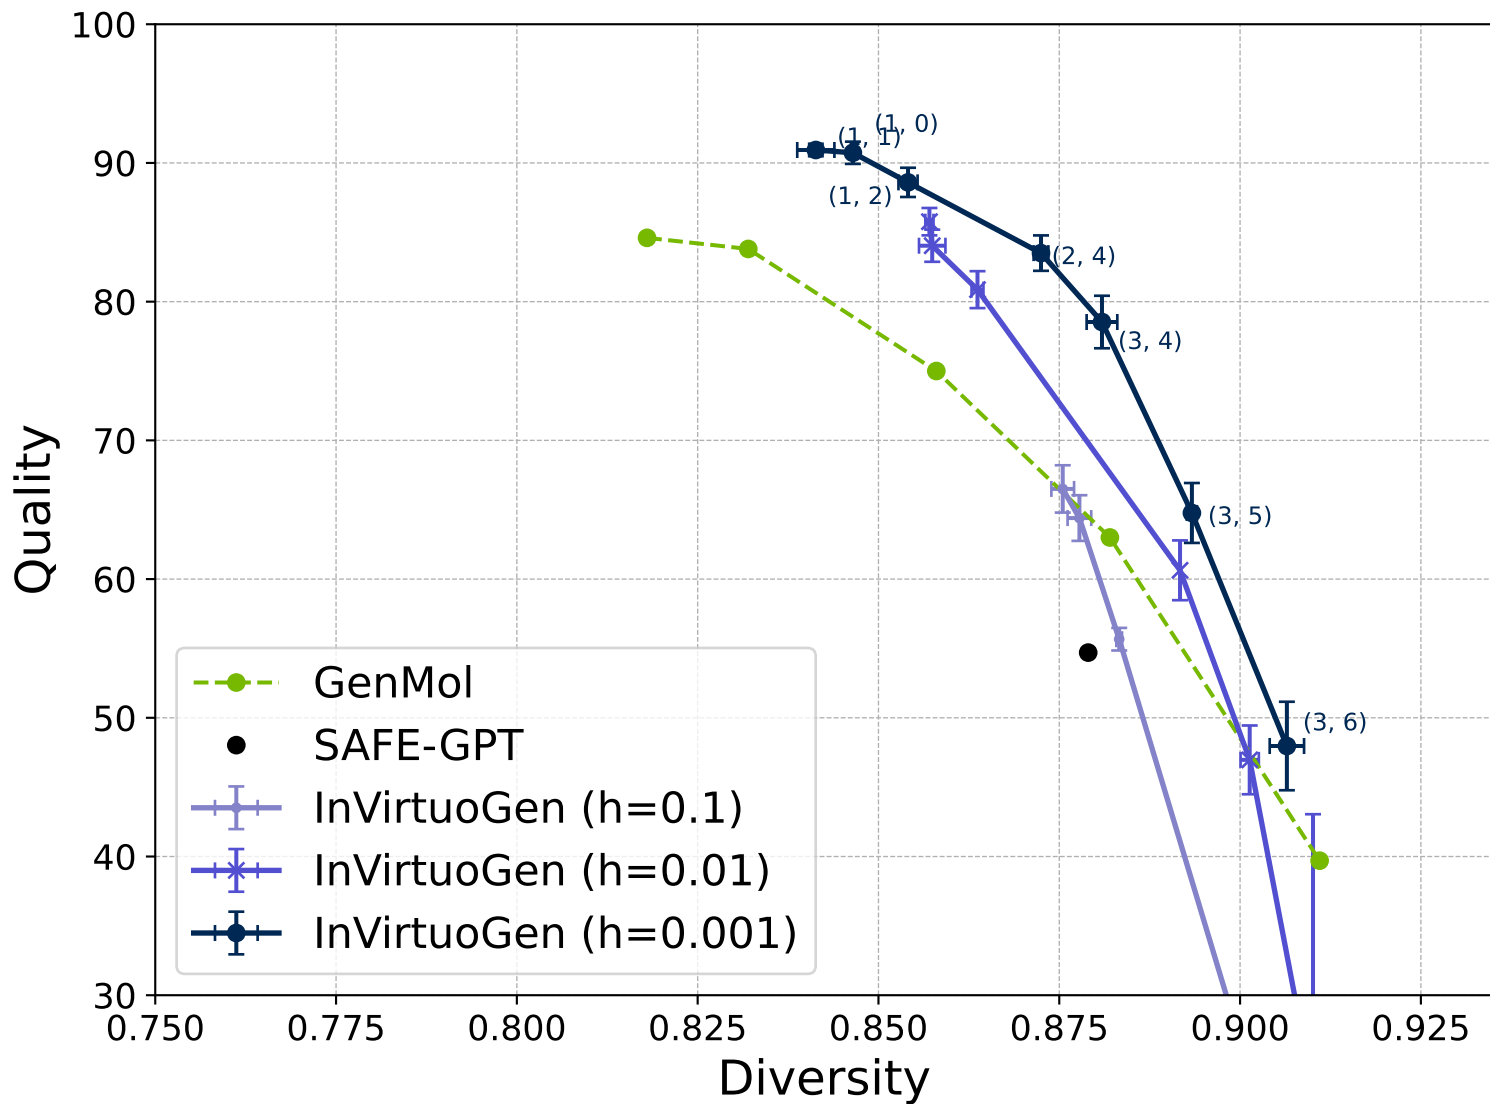

Supplement: supplementary_material [file quality_vs_diversity_small_eta_999.0.pdf › ICLR/plots/denovo/quality_vs_diversity_small_eta_999.0.pdf]
